# Supplementary material for: Phylogenomics of Plant-Associated Botryosphaeriaceae Species
Source: PubMed Central journal article supplement (PMC8012773; doi:10.3389/fmicb.2021.652802), 2021-03-18
Supplement: Image_2.pdf [file Image_2.pdf]

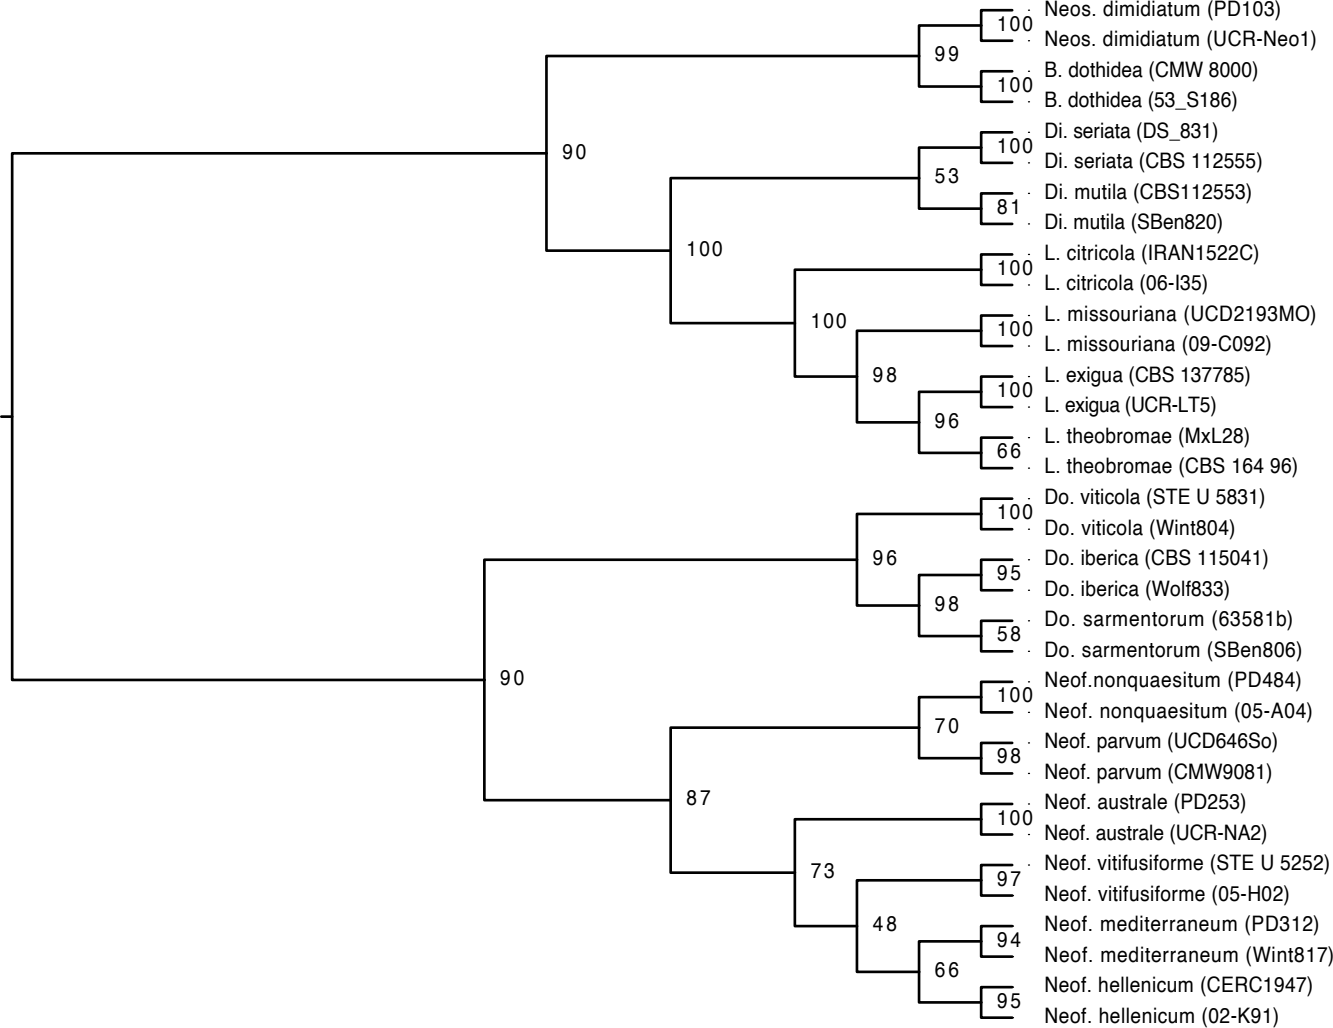

**Supplementary Figure 2.** Maximum-likelihood tree from ITS and TEF markers from different isolates of the Botryosphaeriaceae species in this study.
