# Supplementary material for: Phylogenomics of Plant-Associated Botryosphaeriaceae Species
Source: Front Microbiol. 2021 Mar 18;12:652802. doi: 10.3389/fmicb.2021.652802 (PMC8012773; doi:10.3389/fmicb.2021.652802)
Supplement: Supplementary file 3 [file Table_1.XLSX]

## Sheet: Table 1
Additional file 1 Table1. Extended summary of the Genome assembly statistics of the species analyzed
Specie	Isolate	Read counts	Coverage	Expected Genome size	Total assembly size (bp)	N. of scaffolds	Ave. scaffold size (bp)	Median scaffold zise (bp)	N25 (bp)	N50 (bp)	N75 (bp)	Max scaffold size (bp)	GC content (%)	GC St.Dev	L50 scaffolds number
Botryosphaeria dothidea	0053	49587798	161.715	45415379	45995678	2425	18967.3	157	826712	506185	218393	1826807	46.53	7.83	28
Diplodia mutila	SBen820	54103256	177.198	50393817	45799008	4003	11441.2	214	346966	174885	59896	826787	43.22	9.92	67
Diplodia seriata	DS_831	23582404	94.3498	38203014	37491995	811	46229.3	299	526204	300735	149414	1288528	51.23	11.28	39
Dothiorella iberica	Wolf833	48590324	199.143	44206195	36599565	636	57546.5	200.5	731578	412000	222981	1025072	36.33	15.77	28
Dothiorella sarmentorum	SBen806	55590662	198.779	38882781	41948998	1664	25209.7	375.5	356175	242172	139439	849929	38.88	11.01	57
Dothiorella viticola	Wint804	49429892	202.787	44865777	36562887	2477	14761	495	767601	482240	253893	1280368	63.82	9.73	25
Lasiodiplodia citricola	06I-35	54719116	188.078	48655423	43640822	216	202041	1040.5	1904118	1067051	772283	2431954	49.63	11.71	13
Lasiodiplodia exigua	UCR-LT5	45436366	156.371	47759935	43585289	340	128192	629.5	1618949	719558	448229	2625781	47.4	12.97	15
Lasiodiplodia missouriana	09-C092	50998086	173.69	47821973	44042295	324	135933	1021.5	1328575	882625	575486	3430492	50.13	11.49	17
Lasiodiplodia theobromae	MxL28	49123082	168.504	47565097	43728636	193	226573	1230	1432351	882800	556440	3908985	50.22	10.64	16
Neofusicoccum australe	UCR-NA2	54825522	196.925	47756288	41761143	2218	18828.3	186	580997	384877	159959	1065432	52.83	10.68	35
Neofusicoccum hellenicum	02-K91	55812340	196.407	47848446	42624928	221	192873	5463	1307678	767511	408331	2282710	52.2	14.38	19
Neofusicoccum mediterraneum	Wint817	48558328	171.716	48197305	42417465	196	216416	118654	859614	551229	262070	2193285	54.7	11.84	24
Neofusicoccum nonquaesitum	05-A04	52560980	183.62	47321957	42937372	316	135878	4187	1258027	667038	284353	1787513	51.07	11.1	19
Neofusicoccum parvum	N646So	15724002	54.3495	43850700	43396948	2452	17698.6	257	318647	167734	83988	880606	47.15	10.81	74
Neofusicoccum vitifusiforme	05-H02	57420734	206.306	47248552	41749193	288	144962	1527.5	962907	505638	307316	1891561	49.8	14	24
Neoscytalidium dimidiatum	UCR-Neo1	51728564	184.38	48421053	42083147	478	88040.1	1465	763134	418801	248516	1710720	49.28	10.46	31

## Sheet: Table 2
Additional file 1 Table2. Repeat content analysis of the Botryosphaeriaceae species in this study
Specie	Isolate	Total genome length (bp)	Bases masked (bp)	Bases masked %	Total interspersed repeats (bp)	Total interspersed repeats %	LTR elements (bp)	LTR elements %	DNA elements (bp)	DNA elements %	Non-LTR elements (bp)	Non-LTR elements %	Unclassified (bp)	Unclassified %	Satellites (bp)	Satellites %	Simple repeats (bp)	Simple repeats %	Low complexity (bp)	Low complexity %
Botryosphaeria dothidea	53_S186	45995678	2608021	0.0567	2175267	0.0473	314547	0.0068	65755	0.0014	23789	0.000517201	1771176	0.0385	1412	3.06985e-05	380343	0.0082691	51465	0.00111891
Diplodia mutila	SBen820	45799008	2877891	0.0628	2081405	0.0454	182980	0.004	17321	0.0004	31399	0.000685583	1849705	0.0404	1157	2.52626e-05	700005	0.0152843	96646	0.00211022
Diplodia seriata	DS_831	37491995	1144284	0.0305	482577	0.0129	73902	0.002	16258	0.0004	17593	0.000469247	374824	0.01	685	1.82706e-05	576898	0.0153872	85429	0.00227859
Dothiorella iberica	Wolf833	36599565	1350049	0.0369	770353	0.021	71016	0.0019	14870	0.0004	18806	0.000513831	665661	0.0182	1411	3.85524e-05	496162	0.0135565	82927	0.00226579
Dothiorella sarmentorum	SBen806	41948998	1687353	0.0402	1067074	0.0254	37491	0.0009	16387	0.0004	19238	0.000458605	993958	0.0237	964	2.29803e-05	531363	0.0126669	88227	0.0021032
Dothiorella viticola	Wint804	36562887	950252	0.026	375733	0.0103	43148	0.0012	14236	0.0004	17200	0.000470422	301149	0.0082	301	8.23239e-06	481165	0.0131599	94106	0.00257381
Lasiodiplodia citricola	06I-35	43640822	825529	0.0189	370030	0.0085	33267	0.0008	14514	0.0003	14841	0.000340072	307408	0.007	1286	2.94678e-05	390753	0.00895384	64284	0.00147302
Lasiodiplodia exigua	UCR-LT5	43585289	771071	0.0177	311228	0.0071	32622	0.0007	15163	0.0003	16382	0.000375861	247061	0.0057	886	2.0328e-05	392486	0.00900501	67422	0.0015469
Lasiodiplodia missouriana	09-C092	44042295	833148	0.0189	376309	0.0085	31178	0.0007	20540	0.0005	15173	0.00034451	309418	0.007	1235	2.80412e-05	392171	0.00890442	64596	0.00146668
Lasiodiplodia theobromae	MxL28	43728636	820166	0.0188	365762	0.0084	37804	0.0009	13378	0.0003	17508	0.000400378	297072	0.0068	921	2.10617e-05	391355	0.00894963	63151	0.00144416
Neofusicoccum australe	UCR-NA2	41761143	2055816	0.0492	1368843	0.0328	71245	0.0017	99409	0.0024	46490	0.00111324	1151699	0.0276	2826	6.76706e-05	614204	0.0147075	78817	0.00188733
Neofusicoccum hellenicum	02-K91	42624928	1078449	0.0253	581189	0.0136	25081	0.0006	8243	0.0002	10560	0.000247742	537305	0.0126	962	2.2569e-05	430101	0.0100904	66542	0.00156111
Neofusicoccum mediterraneum	Wint817	42417465	960302	0.0226	417823	0.0099	21126	0.0005	9407	0.0002	9155	0.000215831	378135	0.0089	1280	3.01762e-05	472599	0.0111416	68978	0.00162617
Neofusicoccum nonquaesitum	05-A04	42937372	1010201	0.0235	461187	0.0107	36202	0.0008	11763	0.0003	12803	0.000298178	400419	0.0093	3213	7.48299e-05	477137	0.0111124	69086	0.00160899
Neofusicoccum parvum	N646so	43396948	2170098	0.05	1549193	0.0357	47840	0.0011	23651	0.0005	14885	0.000342996	1462817	0.0337	1373	3.16382e-05	544648	0.0125504	75328	0.00173579
Neofusicoccum vitifusiforme	05-H02	41749193	1405151	0.0337	911093	0.0218	50299	0.0012	9172	0.0002	9185	0.000220004	842437	0.0202	895	2.14375e-05	425193	0.0101845	68472	0.00164008
Neoscytalidium dimidiatum	UCR-Neo1	42083147	1099801	0.0261	429726	0.0102	26420	0.0006	21776	0.0005	20479	0.000486632	361051	0.0086	1055	2.50694e-05	593134	0.0140943	76811	0.00182522
Average						0.0193824		0.00155294		0.000535294		0.000441196		0.0168471		3.03698e-05		0.0116481		0.00178035
SE						0.00324443		0.00038674		0.000133929		5.14199e-05		0.00286345		4.07483e-06		0.000593814		9.11672e-05

## Sheet: Table 3
Additional file 1 Table3. Functional annotation of the predicted proteins of the species analyzed
Specie	Protein ID	Antismash known Sec. metabolite clusters	Antismash Sec. metabolites	Cyped P450 homologoous family	Cyped P450 family	dbCAN2 CAZymes	Secreted CAZymes	fPoxDB peroxidase	Pfam domain	SignalP5 peptide	TCDB Superfamily code	TCBD Superfamily	TCDB class	TCDB Code	GO description	GO Names
B. dothidea	53_S186_L007_g4798.t1			hfid_12	CYP1				p450						cytochrome p450 monooxygenase	F:binding; F:oxidoreductase activity
B. dothidea	53_S186_L007_g1024.t1			hfid_755	CYP102				NAD_binding_1;FAD_binding_6		5.B.1	The_Phagocyte_(gp91<sup>phox</sup>)_NADPH_Oxidase_Family	_Transmembrane_Electron_Carriers	5.B.1.2.4	oxidoreductase NAD-binding domain-containing protein	C:membrane; F:oxidoreductase activity
B. dothidea	53_S186_L007_g1073.t1			hfid_757	CYP102				Abhydrolase_3						putative lipase 2 protein	F:hydrolase activity
B. dothidea	53_S186_L007_g10892.t1			hfid_762	CYP102				p450;NAD_binding_1;Flavodoxin_1;FAD_binding_1						bifunctional P-450/NADPH-P450 reductase	F:iron ion binding; F:FMN binding; F:oxidoreductase activity, acting on paired donors, with incorporation or reduction of molecular oxygen; F:heme binding; P:oxidation-reduction process
B. dothidea	53_S186_L007_g11049.t1			hfid_757	CYP102				Abhydrolase_3						putative alpha beta hydrolase fold protein	F:hydrolase activity
B. dothidea	53_S186_L007_g11395.t1	Fumonisin	NRPS	hfid_748	CYP102				p450;NAD_binding_1;Flavodoxin_1;FAD_binding_1						NADPH--cytochrome P450 reductase	F:binding; F:oxidoreductase activity
B. dothidea	53_S186_L007_g11398.t1			hfid_757	CYP102				Abhydrolase_3						triacylglycerol lipase	F:hydrolase activity
B. dothidea	53_S186_L007_g11449.t1			hfid_764	CYP102				NAD_binding_1;Flavodoxin_1;NO_synthase						nitric oxide synthase	F:nitric-oxide synthase activity; P:nitric oxide biosynthetic process; F:FMN binding; P:oxidation-reduction process
B. dothidea	53_S186_L007_g11520.t1			hfid_757	CYP102				Abhydrolase_3						putative lipase 2 protein	C:nucleus; C:cytosol; F:hydrolase activity
B. dothidea	53_S186_L007_g12040.t1			hfid_757	CYP102				p450;NAD_binding_1;Flavodoxin_1;FAD_binding_1						bifunctional P-450:NADPH-P450 reductase	F:binding; F:oxidoreductase activity
B. dothidea	53_S186_L007_g12096.t1		T1PKS	hfid_757	CYP102				Abhydrolase_3						Alpha/beta hydrolase fold-3	F:hydrolase activity
B. dothidea	53_S186_L007_g1420.t1			hfid_757	CYP102				Abhydrolase_3						alpha/beta hydrolase fold-3	F:hydrolase activity
B. dothidea	53_S186_L007_g1925.t1			hfid_764	CYP102				p450;NAD_binding_1;Flavodoxin_1;FAD_binding_1						bifunctional P-450:NADPH-P450 reductase	F:NADPH-hemoprotein reductase activity; F:iron ion binding; F:FMN binding; F:heme binding; P:oxidation-reduction process; F:aromatase activity
B. dothidea	53_S186_L007_g1957.t1			hfid_757	CYP102				Abhydrolase_3						predicted protein	F:hydrolase activity
B. dothidea	53_S186_L007_g2249.t1			hfid_757	CYP102				Abhydrolase_3						potassium transporter protein	C:integral component of plasma membrane; F:potassium ion transmembrane transporter activity; F:hydrolase activity; P:cellular potassium ion homeostasis; P:potassium ion transmembrane transport
B. dothidea	53_S186_L007_g2564.t1			hfid_757	CYP102				Abhydrolase_3						Alpha/beta hydrolase fold-3	C:cellular_component; F:hydrolase activity
B. dothidea	53_S186_L007_g3518.t1			hfid_757	CYP102				Abhydrolase_3						alpha/beta hydrolase fold-3 domain-containing protein	F:hydrolase activity
B. dothidea	53_S186_L007_g45.t1			hfid_757	CYP102				Abhydrolase_3						alpha/beta hydrolase fold-3 domain-containing protein	F:hydrolase activity
B. dothidea	53_S186_L007_g4847.t1			hfid_757	CYP102				Abhydrolase_3						putative esterase lipase thioesterase protein	F:hydrolase activity
B. dothidea	53_S186_L007_g4969.t1			hfid_757	CYP102				Abhydrolase_3						triacylglycerol lipase	F:hydrolase activity
B. dothidea	53_S186_L007_g5074.t1			hfid_757	CYP102				Abhydrolase_3						alpha/beta hydrolase fold protein	C:cellular_component; F:hydrolase activity
B. dothidea	53_S186_L007_g5173.t1			hfid_750	CYP102										predicted protein	C:membrane; C:integral component of membrane
B. dothidea	53_S186_L007_g5221.t1			hfid_757	CYP102				Abhydrolase_3						putative alpha beta hydrolase fold-3 domain-containing protein	F:hydrolase activity
B. dothidea	53_S186_L007_g5390.t1			hfid_757	CYP102				Peptidase_S9;Abhydrolase_3						putative myb dna-binding domain protein	F:hydrolase activity
B. dothidea	53_S186_L007_g5870.t1			hfid_757	CYP102				Abhydrolase_3						alpha/beta hydrolase fold-3 domain-containing protein	F:hydrolase activity
B. dothidea	53_S186_L007_g5950.t1			hfid_757	CYP102				Abhydrolase_3						esterase/lipase, putative	F:hydrolase activity
B. dothidea	53_S186_L007_g6023.t1			hfid_757	CYP102				Abhydrolase_3						predicted protein	F:hydrolase activity
B. dothidea	53_S186_L007_g6085.t1			hfid_757	CYP102				DLH;Abhydrolase_3						polyketide synthase	F:hydrolase activity
B. dothidea	53_S186_L007_g6653.t1			hfid_759	CYP102				Flavodoxin_1;NIR_SIR;POR_N;NIR_SIR_ferr						sulfite reductase hemo protein beta-component	F:sulfite reductase (NADPH) activity; P:cellular amino acid biosynthetic process; C:sulfite reductase complex (NADPH); F:FMN binding; F:sulfite reductase activity; F:heme binding; F:sulfite reductase (ferredoxin) activity; F:NADP binding; F:4 iron, 4 sulfur cluster binding; P:oxidation-reduction process
B. dothidea	53_S186_L007_g7131.t1			hfid_750	CYP102				p450						bifunctional P-450:NADPH-P450 reductase	F:monooxygenase activity; F:iron ion binding; F:FMN binding; C:membrane; F:oxidoreductase activity, acting on paired donors, with incorporation or reduction of molecular oxygen; F:heme binding; P:oxidation-reduction process
B. dothidea	53_S186_L007_g7132.t1			hfid_751	CYP102				NAD_binding_1;Flavodoxin_1;FAD_binding_1						bifunctional P-450:NADPH-P450 reductase	F:oxidoreductase activity; F:ion binding
B. dothidea	53_S186_L007_g7718.t1			hfid_757	CYP102				Abhydrolase_3						esterase, putative	F:hydrolase activity
B. dothidea	53_S186_L007_g7721.t1			hfid_757	CYP102				Abhydrolase_3						lipase 2	F:hydrolase activity
B. dothidea	53_S186_L007_g7805.t1			hfid_770	CYP102				p450;NAD_binding_1;Flavodoxin_1;FAD_binding_1						bifunctional P-450/NADPH-P450 reductase	P:sulfur amino acid metabolic process; F:nucleotide binding; F:monooxygenase activity; F:oxidoreductase activity, acting on paired donors, with incorporation or reduction of molecular oxygen; F:anion binding; F:metal ion binding; F:coenzyme binding; P:alpha-amino acid metabolic process
B. dothidea	53_S186_L007_g8506.t1			hfid_757	CYP102				Abhydrolase_3						carboxylesterase, putative	F:hydrolase activity
B. dothidea	53_S186_L007_g8562.t1			hfid_755	CYP102				NAD_binding_1;FAD_binding_1						FAD binding domain-containing protein	F:NADPH-hemoprotein reductase activity; C:cytosol; P:methionine biosynthetic process; F:FMN binding; F:[methionine synthase] reductase activity; F:flavin adenine dinucleotide binding; P:homocysteine metabolic process; P:oxidation-reduction process
B. dothidea	53_S186_L007_g8632.t1			hfid_757	CYP102				Abhydrolase_3						lipase 2	F:hydrolase activity
B. dothidea	53_S186_L007_g9725.t1			hfid_757	CYP102				Abhydrolase_3						alpha/beta hydrolase fold-3 domain-containing protein	F:hydrolase activity
B. dothidea	53_S186_L007_g9833.t1			hfid_757	CYP102				Abhydrolase_3						putative lipase 2 protein	F:hydrolase activity
B. dothidea	53_S186_L007_g637.t1			hfid_774	CYP105			Linoleate_diol_synthase_(PGHS_like)	An_peroxidase;H_lectin						linoleate diol synthase	F:binding; P:metabolic process; P:cellular process; C:membrane; F:oxidoreductase activity; P:response to stimulus
B. dothidea	53_S186_L007_g10840.t1			hfid_844	CYP107			Linoleate_diol_synthase_(PGHS_like)	p450;An_peroxidase						heme peroxidase	F:peroxidase activity; F:iron ion binding; P:response to oxidative stress; F:oxidoreductase activity, acting on paired donors, with incorporation or reduction of molecular oxygen; F:heme binding; P:oxylipin biosynthetic process; P:oxidation-reduction process; P:cellular oxidant detoxification
B. dothidea	53_S186_L007_g2904.t1			hfid_900	CYP107			Linoleate_diol_synthase_(PGHS_like)	p450;An_peroxidase						fatty acid oxygenase	F:peroxidase activity; F:iron ion binding; P:response to oxidative stress; F:oxidoreductase activity, acting on paired donors, with incorporation or reduction of molecular oxygen; F:heme binding; P:oxylipin biosynthetic process; P:oxidation-reduction process; P:cellular oxidant detoxification
B. dothidea	53_S186_L007_g10742.t1			hfid_829	CYP107	AA3			GMC_oxred_N;GMC_oxred_C						putative choline dehydrogenase protein	F:aryl-alcohol oxidase activity; F:flavin adenine dinucleotide binding; P:oxidation-reduction process
B. dothidea	53_S186_L007_g9871.t1			hfid_836	CYP107				DAHP_synth_2						phospho-2-dehydro-3-deoxyheptonate aldolase	F:3-deoxy-7-phosphoheptulonate synthase activity; P:aromatic amino acid family biosynthetic process; P:chorismate biosynthetic process
B. dothidea	53_S186_L007_g8027.t1			hfid_948	CYP110				Dynamin_N;Dynamin_M		1.I.1	The_Eukaryotic_Nuclear_Pore_Complex_(E-NPC)_Family	_Channels/Pores	1.I.1.1.3	dynamin GTPase, putative	F:binding
B. dothidea	53_S186_L007_g10160.t1	Leucinostatins	T1PKS|NRPS	hfid_971	CYP116				Cyt-b5;NAD_binding_1;FAD_binding_6;FSH1		5.B.1	The_Phagocyte_(gp91<sup>phox</sup>)_NADPH_Oxidase_Family	_Transmembrane_Electron_Carriers	5.B.1.2.4	Cytochrome b5	F:oxidoreductase activity; F:transferase activity; F:phosphopantetheine binding; P:oxidation-reduction process
B. dothidea	53_S186_L007_g6594.t1			hfid_971	CYP116				NAD_binding_1;FAD_binding_6		5.B.1	The_Phagocyte_(gp91<sup>phox</sup>)_NADPH_Oxidase_Family	_Transmembrane_Electron_Carriers	5.B.1.2.4	NADH-cytochrome b5 reductase 1	F:cytochrome-b5 reductase activity, acting on NAD(P)H; C:mitochondrial outer membrane; C:endoplasmic reticulum membrane; C:integral component of membrane; P:oxidation-reduction process
B. dothidea	53_S186_L007_g754.t1			hfid_971	CYP116				NAD_binding_1;FAD_binding_6		5.B.1	The_Phagocyte_(gp91<sup>phox</sup>)_NADPH_Oxidase_Family	_Transmembrane_Electron_Carriers	5.B.1.2.4	NADH-cytochrome b5 reductase 2	F:cytochrome-b5 reductase activity, acting on NAD(P)H; C:mitochondrial intermembrane space; P:ergosterol biosynthetic process; C:integral component of mitochondrial outer membrane; P:cellular response to oxidative stress; P:oxidation-reduction process
B. dothidea	53_S186_L007_g7828.t1			hfid_971	CYP116				Cyt-b5;NAD_binding_1;FAD_binding_6		5.B.1	The_Phagocyte_(gp91<sup>phox</sup>)_NADPH_Oxidase_Family	_Transmembrane_Electron_Carriers	5.B.1.3.2	cytochrome B5	C:integral component of membrane; F:oxidoreductase activity; P:oxidation-reduction process
B. dothidea	53_S186_L007_g7876.t1			hfid_971	CYP116				NAD_binding_1;FAD_binding_6						putative cytochrome c mitochondrial import factor protein	F:binding; P:cellular amino acid biosynthetic process; F:oxidoreductase activity; P:oxidation-reduction process
B. dothidea	53_S186_L007_g6513.t1			hfid_1005	CYP125			Linoleate_diol_synthase_(PGHS_like)	p450;An_peroxidase						prostaglandin-endoperoxide synthase 1	F:peroxidase activity; F:iron ion binding; P:response to oxidative stress; F:oxidoreductase activity, acting on paired donors, with incorporation or reduction of molecular oxygen; F:heme binding; P:oxylipin biosynthetic process; P:oxidation-reduction process; P:cellular oxidant detoxification
B. dothidea	53_S186_L007_g10173.t1	Leucinostatins	T1PKS|NRPS	hfid_1003	CYP125				AMP-binding;AMP-binding_C		4.C.1	The_Fatty_Acid_Transporter_(FAT)_Family	_Group_Translocators	4.C.1.1.7	putative phenylacetyl- ligase protein	F:ligase activity
B. dothidea	53_S186_L007_g10360.t1			hfid_1003	CYP125				AMP-binding;AMP-binding_C		4.C.1	The_Fatty_Acid_Transporter_(FAT)_Family	_Group_Translocators	4.C.1.1.7	Acetyl-CoA synthetase-like protein	F:ligase activity
B. dothidea	53_S186_L007_g10383.t1		betalactone	hfid_1003	CYP125				AMP-binding;AMP-binding_C		4.C.1	The_Fatty_Acid_Transporter_(FAT)_Family	_Group_Translocators	4.C.1.1.4	4-coumarate-CoA ligase	F:catalytic activity; F:ligase activity
B. dothidea	53_S186_L007_g10553.t1			hfid_1003	CYP125				AMP-binding;AMP-binding_C	SP(Sec/SPI)	4.C.1	The_Fatty_Acid_Transporter_(FAT)_Family	_Group_Translocators	4.C.1.1.7	Acetyl-CoA synthetase-like protein	F:catalytic activity
B. dothidea	53_S186_L007_g10640.t1			hfid_1003	CYP125				AMP-binding;AMP-binding_C;ACAS_N		4.C.1	The_Fatty_Acid_Transporter_(FAT)_Family	_Group_Translocators	4.C.1.1.7	acetate--CoA ligase	F:acetate-CoA ligase activity; F:ATP binding; F:AMP binding; P:acetyl-CoA biosynthetic process from acetate
B. dothidea	53_S186_L007_g10816.t1		NRPS-like	hfid_1003	CYP125				AMP-binding;PP-binding;Thioesterase		4.C.1	The_Fatty_Acid_Transporter_(FAT)_Family	_Group_Translocators	4.C.1.1.4	putative non-ribosomal peptide synthase-like protein	F:catalytic activity; P:terrequinone A biosynthetic process
B. dothidea	53_S186_L007_g11148.t1		NRPS	hfid_1003	CYP125				AMP-binding;PP-binding;Condensation		4.C.1	The_Fatty_Acid_Transporter_(FAT)_Family	_Group_Translocators	4.C.1.1.4	nonribosomal peptide synthetase 2	P:biosynthetic process; P:cellular process; F:ligase activity; F:phosphopantetheine binding
B. dothidea	53_S186_L007_g11388.t1	Fumonisin	NRPS	hfid_1003	CYP125				AMP-binding;AMP-binding_C		4.C.1	The_Fatty_Acid_Transporter_(FAT)_Family	_Group_Translocators	4.C.1.1.6	acetyl-CoA synthetase-like protein	F:catalytic activity
B. dothidea	53_S186_L007_g11930.t1			hfid_1003	CYP125				AMP-binding		4.C.1	The_Fatty_Acid_Transporter_(FAT)_Family	_Group_Translocators	4.C.1.1.14	acetyl-CoA synthetase-like protein	F:ligase activity
B. dothidea	53_S186_L007_g12297.t1			hfid_1003	CYP125				AMP-binding;AMP-binding_C		4.C.1	The_Fatty_Acid_Transporter_(FAT)_Family	_Group_Translocators	4.C.1.1.2	acetyl-CoA synthetase-like protein	F:ligase activity
B. dothidea	53_S186_L007_g12421.t1			hfid_1003	CYP125				AMP-binding;AMP-binding_C		4.C.1	The_Fatty_Acid_Transporter_(FAT)_Family	_Group_Translocators	4.C.1.1.7	4-coumarate-CoA ligase-like protein	F:ligase activity
B. dothidea	53_S186_L007_g1359.t1			hfid_1003	CYP125				AMP-binding;AMP-binding_C		4.C.1	The_Fatty_Acid_Transporter_(FAT)_Family	_Group_Translocators	4.C.1.1.4	acetyl-CoA synthetase-like protein	C:integral component of membrane; F:ligase activity
B. dothidea	53_S186_L007_g1471.t1			hfid_1003	CYP125				AMP-binding;HET;AMP-binding_C		4.C.1	The_Fatty_Acid_Transporter_(FAT)_Family	_Group_Translocators	4.C.1.1.7	phenylacetyl-CoA ligase	P:fatty acid metabolic process; F:oxidoreductase activity; F:ligase activity
B. dothidea	53_S186_L007_g255.t1			hfid_1003	CYP125				AMP-binding;AMP-binding_C		4.C.1	The_Fatty_Acid_Transporter_(FAT)_Family	_Group_Translocators	4.C.1.1.6	Acetyl-CoA synthetase-like protein	F:ligase activity
B. dothidea	53_S186_L007_g3217.t1			hfid_1003	CYP125				AMP-binding;AMP-binding_C		4.C.1	The_Fatty_Acid_Transporter_(FAT)_Family	_Group_Translocators	4.C.1.1.7	acetyl-CoA synthetase-like protein	F:ligase activity
B. dothidea	53_S186_L007_g3540.t1			hfid_1003	CYP125				AMP-binding;AMP-binding_C		4.C.1	The_Fatty_Acid_Transporter_(FAT)_Family	_Group_Translocators	4.C.1.1.7	4-coumarate-CoA ligase	F:catalytic activity
B. dothidea	53_S186_L007_g393.t1			hfid_1003	CYP125				AMP-binding;AMP-binding_C		4.C.1	The_Fatty_Acid_Transporter_(FAT)_Family	_Group_Translocators	4.C.1.1.7	4-coumarate-CoA ligase 2	C:membrane; F:ligase activity
B. dothidea	53_S186_L007_g4080.t1	Hexadehydro-astechrome_(HAS)	NRPS	hfid_1003	CYP125				AMP-binding;PP-binding;Condensation;AMP-binding_C		4.C.1	The_Fatty_Acid_Transporter_(FAT)_Family	_Group_Translocators	4.C.1.1.4	nonribosomal peptide synthase GliP2	F:catalytic activity; P:secondary metabolite biosynthetic process
B. dothidea	53_S186_L007_g4211.t1		NRPS	hfid_1003	CYP125				AMP-binding;PP-binding;Condensation		4.C.1	The_Fatty_Acid_Transporter_(FAT)_Family	_Group_Translocators	4.C.1.1.16	non-ribosomal peptide synthetase	F:catalytic activity
B. dothidea	53_S186_L007_g4525.t1			hfid_1003	CYP125				AMP-binding;AMP-binding_C		4.C.1	The_Fatty_Acid_Transporter_(FAT)_Family	_Group_Translocators	4.C.1.1.5	long-chain fatty acid transporter-like protein	F:catalytic activity
B. dothidea	53_S186_L007_g4590.t1	Brefeldin	T1PKS|NRPS	hfid_1003	CYP125				AMP-binding;PP-binding;Condensation		4.C.1	The_Fatty_Acid_Transporter_(FAT)_Family	_Group_Translocators	4.C.1.1.16	Acetyl-CoA synthetase-like protein	F:ligase activity; F:phosphopantetheine binding
B. dothidea	53_S186_L007_g473.t1	ACT-Toxin	NRPS-like|NRPS|T1PKS	hfid_1003	CYP125				AMP-binding;PP-binding;Condensation		4.C.1	The_Fatty_Acid_Transporter_(FAT)_Family	_Group_Translocators	4.C.1.1.16	HC-toxin synthetase	F:catalytic activity
B. dothidea	53_S186_L007_g5360.t1			hfid_1003	CYP125				AMP-binding;AMP-binding_C		4.C.1	The_Fatty_Acid_Transporter_(FAT)_Family	_Group_Translocators	4.C.1.1.7	AMP-binding enzyme	F:catalytic activity
B. dothidea	53_S186_L007_g5569.t1	HC-toxin	NRPS	hfid_1003	CYP125				AMP-binding;PP-binding;Condensation;AMP-binding_C		4.C.1	The_Fatty_Acid_Transporter_(FAT)_Family	_Group_Translocators	4.C.1.1.4	Nonribosomal siderophore peptide synthase SidC	P:cellular response to iron ion starvation; P:ferricrocin biosynthetic process; P:siderophore-dependent iron import into cell
B. dothidea	53_S186_L007_g5647.t1			hfid_1003	CYP125				AMP-binding		4.C.1	The_Fatty_Acid_Transporter_(FAT)_Family	_Group_Translocators	4.C.1.1.4	amino acid adenylation domain-containing protein	F:catalytic activity; C:integral component of membrane
B. dothidea	53_S186_L007_g5778.t1			hfid_1003	CYP125				SNF2_N;Helicase_C;AMP-binding;DUF3535;AMP-binding_C		4.C.1	The_Fatty_Acid_Transporter_(FAT)_Family	_Group_Translocators	4.C.1.1.6	TBP associated factor (Mot1)	F:protein serine/threonine kinase activity; F:ATP binding; P:protein phosphorylation
B. dothidea	53_S186_L007_g6042.t1	Aspirochlorine	NRPS	hfid_1003	CYP125				AMP-binding;Condensation;AMP-binding_C		4.C.1	The_Fatty_Acid_Transporter_(FAT)_Family	_Group_Translocators	4.C.1.1.4	nonribosomal peptide synthase GliP-like protein	F:nucleotide binding; P:metabolic process; F:ligase activity; F:anion binding
B. dothidea	53_S186_L007_g6441.t1			hfid_1003	CYP125				AMP-binding;AMP-binding_C		4.C.1	The_Fatty_Acid_Transporter_(FAT)_Family	_Group_Translocators	4.C.1.1.4	acetyl-CoA synthetase-like protein	F:ligase activity
B. dothidea	53_S186_L007_g6557.t1		NRPS-like	hfid_1003	CYP125				AMP-binding;AMP-binding_C		4.C.1	The_Fatty_Acid_Transporter_(FAT)_Family	_Group_Translocators	4.C.1.1.7	4-coumarate-CoA ligase-like protein	C:integral component of membrane; F:ligase activity; F:Photinus-luciferin 4-monooxygenase (ATP-hydrolyzing) activity; P:oxidation-reduction process
B. dothidea	53_S186_L007_g7206.t1		NRPS	hfid_1003	CYP125				AMP-binding;AMP-binding_C		4.C.1	The_Fatty_Acid_Transporter_(FAT)_Family	_Group_Translocators	4.C.1.1.4	long-chain acyl-CoA synthetase	C:membrane; F:ligase activity
B. dothidea	53_S186_L007_g7207.t1		NRPS	hfid_1003	CYP125				AMP-binding;PP-binding;Condensation;AMP-binding_C		4.C.1	The_Fatty_Acid_Transporter_(FAT)_Family	_Group_Translocators	4.C.1.1.4	Nonribosomal siderophore peptide synthase SidC	F:catalytic activity; P:intracellular sequestering of iron ion; P:cellular response to iron ion starvation; P:ferricrocin biosynthetic process; F:phosphopantetheine binding; P:siderophore-dependent iron import into cell; P:cellular response to oxidative stress
B. dothidea	53_S186_L007_g8446.t1			hfid_1003	CYP125				AMP-binding;AMP-binding_C		4.C.1	The_Fatty_Acid_Transporter_(FAT)_Family	_Group_Translocators	4.C.1.1.2	acetyl-CoA synthetase-like protein	F:ligase activity
B. dothidea	53_S186_L007_g8495.t1			hfid_1003	CYP125				AMP-binding;AMP-binding_C		4.C.1	The_Fatty_Acid_Transporter_(FAT)_Family	_Group_Translocators	4.C.1.1.7	4-coumarate-CoA ligase	F:catalytic activity
B. dothidea	53_S186_L007_g8574.t1			hfid_1003	CYP125				AMP-binding;AMP-binding_C		4.C.1	The_Fatty_Acid_Transporter_(FAT)_Family	_Group_Translocators	4.C.1.1.4	acetyl-CoA synthetase-like protein	P:long-chain fatty acid metabolic process; F:acyl-CoA ligase activity; F:long-chain fatty acid-CoA ligase activity; F:decanoate-CoA ligase activity
B. dothidea	53_S186_L007_g8579.t1			hfid_1003	CYP125				AMP-binding;AMP-binding_C		4.C.1	The_Fatty_Acid_Transporter_(FAT)_Family	_Group_Translocators	4.C.1.1.7	phenylacetyl-CoA ligase	P:long-chain fatty acid metabolic process; F:acyl-CoA ligase activity; F:long-chain fatty acid-CoA ligase activity; F:decanoate-CoA ligase activity
B. dothidea	53_S186_L007_g8590.t1		NRPS	hfid_1003	CYP125				AMP-binding;PP-binding;Condensation;AMP-binding_C		4.C.1	The_Fatty_Acid_Transporter_(FAT)_Family	_Group_Translocators	4.C.1.1.4	nonribosomal peptide synthase, putative	F:catalytic activity; P:biosynthetic process; F:phosphopantetheine binding
B. dothidea	53_S186_L007_g8956.t1			hfid_1003	CYP125				AMP-binding;AMP-binding_C		4.C.1	The_Fatty_Acid_Transporter_(FAT)_Family	_Group_Translocators	4.C.1.1.7	acetyl-CoA synthetase-like protein	F:catalytic activity
B. dothidea	53_S186_L007_g9054.t1			hfid_1003	CYP125				AMP-binding;AMP-binding_C		4.C.1	The_Fatty_Acid_Transporter_(FAT)_Family	_Group_Translocators	4.C.1.1.7	4-coumarate-CoA ligase	C:integral component of membrane; F:ligase activity
B. dothidea	53_S186_L007_g9237.t1		NRPS-like	hfid_1003	CYP125				AMP-binding;PP-binding;Thioesterase		4.C.1	The_Fatty_Acid_Transporter_(FAT)_Family	_Group_Translocators	4.C.1.1.4	predicted protein	P:biosynthetic process; F:hydrolase activity, acting on ester bonds
B. dothidea	53_S186_L007_g9693.t1			hfid_1003	CYP125				AMP-binding		4.C.1	The_Fatty_Acid_Transporter_(FAT)_Family	_Group_Translocators	4.C.1.1.15	long-chain-fatty-acid-CoA ligase 1	F:ligase activity
B. dothidea	53_S186_L007_g10074.t1	Aflatrem	T1PKS|terpene	hfid_1064	CYP149				ketoacyl-synt;PP-binding;Acyl_transf_1;Ketoacyl-synt_C;Methyltransf_12;PS-DH;KAsynt_C_assoc						Polyketide synthase	P:metabolic process; F:transferase activity
B. dothidea	53_S186_L007_g10161.t1	Leucinostatins	T1PKS|NRPS	hfid_1064	CYP149				ketoacyl-synt;PP-binding;Acyl_transf_1;Ketoacyl-synt_C;ADH_N;KR;PS-DH;KAsynt_C_assoc						PKSN polyketide synthase for alternapyrone biosynthesis	F:transferase activity
B. dothidea	53_S186_L007_g10170.t1	Leucinostatins	T1PKS|NRPS	hfid_1064	CYP149				ketoacyl-synt						polyketide synthase	F:methyltransferase activity; F:oxidoreductase activity; F:transferase activity, transferring acyl groups; P:secondary metabolic process; F:phosphopantetheine binding; P:methylation; P:oxidation-reduction process
B. dothidea	53_S186_L007_g10529.t1			hfid_1064	CYP149				ketoacyl-synt;Ketoacyl-synt_C;KAsynt_C_assoc						KR domain-containing protein	C:integral component of membrane; F:oxidoreductase activity; F:transferase activity; F:hydrolase activity; P:secondary metabolic process; F:phosphopantetheine binding; P:oxidation-reduction process
B. dothidea	53_S186_L007_g11266.t1	Isoflavipucine	NRPS|T1PKS	hfid_1064	CYP149				ketoacyl-synt;AMP-binding;PP-binding;Condensation;Acyl_transf_1;Ketoacyl-synt_C;NAD_binding_4;KR;PS-DH;KAsynt_C_assoc		4.C.1	The_Fatty_Acid_Transporter_(FAT)_Family	_Group_Translocators	4.C.1.1.4	Beta-ketoacyl synthase	F:catalytic activity; P:secondary metabolite biosynthetic process; P:pseurotin A biosynthetic process
B. dothidea	53_S186_L007_g11269.t1	Isoflavipucine	NRPS|T1PKS	hfid_1064	CYP149				ketoacyl-synt;AMP-binding;PP-binding;Ketoacyl-synt_C;AMP-binding_C		4.C.1	The_Fatty_Acid_Transporter_(FAT)_Family	_Group_Translocators	4.C.1.1.4	amino acid adenylation domain protein	F:catalytic activity
B. dothidea	53_S186_L007_g11276.t1	Isoflavipucine	NRPS|T1PKS	hfid_1064	CYP149				ketoacyl-synt;PP-binding;Acyl_transf_1;Ketoacyl-synt_C;ADH_N;KR;ADH_zinc_N_2;PS-DH;KAsynt_C_assoc						polyketide synthase	F:oxidoreductase activity; F:transferase activity; F:phosphopantetheine binding; P:oxidation-reduction process
B. dothidea	53_S186_L007_g11279.t1	Yanuthone_D	T1PKS	hfid_1064	CYP149				ketoacyl-synt;PP-binding;Acyl_transf_1;Ketoacyl-synt_C;KR;PS-DH;KAsynt_C_assoc						6-methylsalicylic acid synthase	F:transferase activity; F:phosphopantetheine binding
B. dothidea	53_S186_L007_g12100.t1		T1PKS	hfid_1064	CYP149				ketoacyl-synt;PP-binding;Acyl_transf_1;Thioesterase;Ketoacyl-synt_C;PS-DH;KAsynt_C_assoc						polyketide synthase	F:transferase activity
B. dothidea	53_S186_L007_g12303.t1	Hypothemycin	T1PKS	hfid_1064	CYP149				ketoacyl-synt;PP-binding;Acyl_transf_1;Thioesterase;Ketoacyl-synt_C;PS-DH;SAT						polyketide synthase	P:biosynthetic process; F:transferase activity; F:hydrolase activity, acting on ester bonds; F:phosphopantetheine binding
B. dothidea	53_S186_L007_g2990.t1		T1PKS	hfid_1064	CYP149				ADH_zinc_N;ketoacyl-synt;PP-binding;Acyl_transf_1;Ketoacyl-synt_C;ADH_N;KR;PS-DH;KAsynt_C_assoc						polyketide synthase	F:oxidoreductase activity; F:transferase activity; F:phosphopantetheine binding; P:oxidation-reduction process
B. dothidea	53_S186_L007_g3503.t1	Alternapyrone	T1PKS	hfid_1064	CYP149				ketoacyl-synt;PP-binding;Acyl_transf_1;Ketoacyl-synt_C;Methyltransf_12;KR;ADH_zinc_N_2;PS-DH;KAsynt_C_assoc						beta-ketoacyl synthase domain-containing protein	F:oxidoreductase activity; F:transferase activity; F:phosphopantetheine binding; P:oxidation-reduction process
B. dothidea	53_S186_L007_g4002.t1	Melanin	T1PKS	hfid_1064	CYP149				ketoacyl-synt;PP-binding;Acyl_transf_1;Thioesterase;Ketoacyl-synt_C;PS-DH;SAT;KAsynt_C_assoc						polyketide synthase	P:biosynthetic process; F:transferase activity; F:hydrolase activity, acting on ester bonds; F:phosphopantetheine binding
B. dothidea	53_S186_L007_g4579.t1	Brefeldin	T1PKS|NRPS	hfid_1064	CYP149				ketoacyl-synt;PP-binding;Acyl_transf_1;Ketoacyl-synt_C;ADH_N;KR;ADH_zinc_N_2;PS-DH;KAsynt_C_assoc						polyketide synthase	F:zinc ion binding; F:oxidoreductase activity; F:transferase activity; F:phosphopantetheine binding; P:oxidation-reduction process
B. dothidea	53_S186_L007_g477.t1	ACT-Toxin	NRPS-like|NRPS|T1PKS	hfid_1064	CYP149				ketoacyl-synt;PP-binding;Acyl_transf_1;Ketoacyl-synt_C;Methyltransf_12;KR;PS-DH;KAsynt_C_assoc						putative pks-nrps protein	P:metabolic process; F:transferase activity
B. dothidea	53_S186_L007_g5101.t1	NG-391	NRPS|T1PKS	hfid_1064	CYP149				ketoacyl-synt;AMP-binding;PP-binding;Condensation;Acyl_transf_1;Ketoacyl-synt_C;NAD_binding_4;Methyltransf_12;KR;PS-DH;KAsynt_C_assoc		4.C.1	The_Fatty_Acid_Transporter_(FAT)_Family	_Group_Translocators	4.C.1.1.4	hybrid PKS-NRPS protein	F:catalytic activity; P:metabolic process
B. dothidea	53_S186_L007_g5410.t1	Patulin	T1PKS	hfid_1064	CYP149				ketoacyl-synt;PP-binding;Acyl_transf_1;Ketoacyl-synt_C;KR;PS-DH;KAsynt_C_assoc						6-methylsalicylic acid synthase	P:metabolic process; F:transferase activity, transferring acyl groups; F:phosphopantetheine binding
B. dothidea	53_S186_L007_g6111.t1		T1PKS	hfid_1064	CYP149				ketoacyl-synt;PP-binding;Acyl_transf_1;Thioesterase;Ketoacyl-synt_C;PS-DH;SAT;KAsynt_C_assoc						polyketide synthase	P:metabolic process; F:transferase activity, transferring acyl groups
B. dothidea	53_S186_L007_g6125.t1		T1PKS	hfid_1064	CYP149				ketoacyl-synt;PP-binding;Acyl_transf_1;Ketoacyl-synt_C;Abhydrolase_3;Methyltransf_12;Hydrolase_4;PS-DH;SAT;KAsynt_C_assoc						polyketide synthase, putative	F:transferase activity
B. dothidea	53_S186_L007_g6141.t1	Phomopsins	NRPS-like|T1PKS	hfid_1064	CYP149				ketoacyl-synt;Peptidase_S9;PP-binding;Acyl_transf_1;Ketoacyl-synt_C;Abhydrolase_3;Methyltransf_12;PS-DH;SAT;KAsynt_C_assoc						Thiolase-like protein	P:metabolic process; F:transferase activity
B. dothidea	53_S186_L007_g6736.t1	Brefeldin	T1PKS	hfid_1064	CYP149				ketoacyl-synt;Ketoacyl-synt_C;KAsynt_C_assoc						beta-ketoacyl synthase domain-containing protein	F:catalytic activity
B. dothidea	53_S186_L007_g6741.t1	Brefeldin	T1PKS	hfid_1064	CYP149				ADH_zinc_N;ketoacyl-synt;PP-binding;Acyl_transf_1;Ketoacyl-synt_C;KR;PS-DH;KAsynt_C_assoc						Beta-ketoacyl synthase	F:catalytic activity; F:ion binding
B. dothidea	53_S186_L007_g7865.t1	Mycophenolic_acid	T1PKS	hfid_1064	CYP149				ketoacyl-synt;PP-binding;Acyl_transf_1;Ketoacyl-synt_C;Abhydrolase_3;Methyltransf_12;PS-DH;SAT;KAsynt_C_assoc						polyketide synthase, putative	F:catalytic activity
B. dothidea	53_S186_L007_g7925.t1	(-)-Mellein	T1PKS	hfid_1064	CYP149				ketoacyl-synt;PP-binding;Acyl_transf_1;Ketoacyl-synt_C;KR;PS-DH;KAsynt_C_assoc						6-methylsalicylic acid synthase	P:metabolic process; F:transferase activity, transferring acyl groups; F:phosphopantetheine binding
B. dothidea	53_S186_L007_g8058.t1	PR	T1PKS|NRPS|terpene	hfid_1064	CYP149				ketoacyl-synt;Acyl_transf_1;Ketoacyl-synt_C;KAsynt_C_assoc						putative pks-nrps protein	F:transferase activity, transferring acyl groups; F:isomerase activity; P:secondary metabolic process
B. dothidea	53_S186_L007_g8246.t1		T1PKS	hfid_1064	CYP149				ketoacyl-synt;PP-binding;Acyl_transf_1;Ketoacyl-synt_C;ADH_N;Methyltransf_12;KR;ADH_zinc_N_2;PS-DH;KAsynt_C_assoc						polyketide synthase	F:catalytic activity
B. dothidea	53_S186_L007_g8391.t1		T1PKS	hfid_1064	CYP149				ketoacyl-synt;PP-binding;Acyl_transf_1;Ketoacyl-synt_C;ADH_N;KR;PS-DH;KAsynt_C_assoc						polyketide synthase	F:catalytic activity; F:zinc ion binding; F:oxidoreductase activity; F:transferase activity; F:phosphopantetheine binding; P:oxidation-reduction process
B. dothidea	53_S186_L007_g8612.t1		T1PKS	hfid_1064	CYP149				ketoacyl-synt;PP-binding;Acyl_transf_1;Ketoacyl-synt_C;ADH_N;Methyltransf_12;KR;ADH_zinc_N_2;PS-DH;KAsynt_C_assoc						lovastatin nonaketide synthase	F:zinc ion binding; F:oxidoreductase activity; F:transferase activity; F:phosphopantetheine binding; P:oxidation-reduction process
B. dothidea	53_S186_L007_g9091.t1		T1PKS	hfid_1064	CYP149				ADH_zinc_N;ketoacyl-synt;PP-binding;Acyl_transf_1;Ketoacyl-synt_C;ADH_N;Methyltransf_12;KR;PS-DH;KAsynt_C_assoc						polyketide synthase	P:metabolic process; F:transferase activity
B. dothidea	53_S186_L007_g11368.t1			hfid_1138	CYP163				AMP-binding						AMP-dependent synthetase/ligase	F:ligase activity
B. dothidea	53_S186_L007_g5281.t1			hfid_1144	CYP165				Tautomerase_2						4-oxalocrotonate tautomerase	F:isomerase activity
B. dothidea	53_S186_L007_g9682.t1			hfid_309	CYP17				p450						Cytochrome p450	F:monooxygenase activity; F:iron ion binding; C:integral component of membrane; F:oxidoreductase activity, acting on paired donors, with incorporation or reduction of molecular oxygen; F:heme binding; P:oxidation-reduction process
B. dothidea	53_S186_L007_g11278.t1	Yanuthone_D	T1PKS	hfid_58	CYP2				p450	SP(Sec/SPI)					cytochrome P450	F:iron ion binding; F:oxidoreductase activity, acting on paired donors, with incorporation or reduction of molecular oxygen; F:heme binding; F:protein dimerization activity; P:oxidation-reduction process
B. dothidea	53_S186_L007_g11342.t1			hfid_45	CYP2				p450						cytochrome p450	F:monooxygenase activity; F:iron ion binding; C:integral component of membrane; F:oxidoreductase activity, acting on paired donors, with incorporation or reduction of molecular oxygen; F:heme binding; P:oxidation-reduction process
B. dothidea	53_S186_L007_g12140.t1			hfid_20	CYP2				p450						cytochrome P450	F:binding; F:oxidoreductase activity
B. dothidea	53_S186_L007_g1492.t1			hfid_18	CYP2				Ribosomal_S5;Ribosomal_S5_C						40S ribosomal protein S2	F:structural constituent of ribosome; P:rRNA export from nucleus; C:cytosolic small ribosomal subunit; C:small-subunit processome; P:positive regulation of translational fidelity; F:small ribosomal subunit rRNA binding
B. dothidea	53_S186_L007_g2125.t1			hfid_20	CYP2				p450	SP(Sec/SPI)					cytochrome P450	F:monooxygenase activity; F:iron ion binding; C:integral component of membrane; F:oxidoreductase activity, acting on paired donors, with incorporation or reduction of molecular oxygen; F:heme binding; P:oxidation-reduction process
B. dothidea	53_S186_L007_g323.t1			hfid_63	CYP2				p450						putative cytochrome p450 protein	F:iron ion binding; C:membrane; C:integral component of membrane; F:oxidoreductase activity, acting on paired donors, with incorporation or reduction of molecular oxygen; F:heme binding; P:oxidation-reduction process
B. dothidea	53_S186_L007_g351.t1			hfid_58	CYP2				Glyoxalase						putative glyoxalase family protein	C:mitochondrion; P:ubiquinone biosynthetic process; C:integral component of membrane; F:oxidoreductase activity
B. dothidea	53_S186_L007_g4524.t1			hfid_45	CYP2				p450;MFS_1		2.A.1	The_Major_Facilitator_Superfamily_(MFS)	_Electrochemical_Potential-driven_Transporters	2.A.1.2.33	putative mfs transporter protein	F:monooxygenase activity; F:iron ion binding; C:integral component of plasma membrane; P:drug transmembrane transport; F:oxidoreductase activity, acting on paired donors, with incorporation or reduction of molecular oxygen; F:heme binding; P:oxidation-reduction process
B. dothidea	53_S186_L007_g5319.t1			hfid_53	CYP2				p450						cytochrome P450 oxidoreductase	F:monooxygenase activity; F:iron ion binding; F:oxidoreductase activity, acting on paired donors, with incorporation or reduction of molecular oxygen; F:heme binding; P:oxidation-reduction process
B. dothidea	53_S186_L007_g5346.t1			hfid_45	CYP2				p450						cytochrome p450	F:monooxygenase activity; F:iron ion binding; C:integral component of membrane; F:oxidoreductase activity, acting on paired donors, with incorporation or reduction of molecular oxygen; F:heme binding; P:oxidation-reduction process
B. dothidea	53_S186_L007_g5411.t1	Patulin	T1PKS	hfid_53	CYP2				p450						putative cytochrome p450 protein	C:membrane; F:oxidoreductase activity; F:metal ion binding
B. dothidea	53_S186_L007_g5413.t1	Patulin	T1PKS	hfid_54	CYP2				p450						Cytochrome P450 oxidoreductase, putative	F:monooxygenase activity; F:iron ion binding; C:integral component of membrane; F:oxidoreductase activity, acting on paired donors, with incorporation or reduction of molecular oxygen; F:heme binding; P:oxidation-reduction process
B. dothidea	53_S186_L007_g5548.t1			hfid_63	CYP2				p450						putative cytochrome p450 protein	F:iron ion binding; C:membrane; F:oxidoreductase activity, acting on paired donors, with incorporation or reduction of molecular oxygen; F:heme binding; P:oxidation-reduction process
B. dothidea	53_S186_L007_g5602.t1			hfid_45	CYP2				p450						cytochrome P450	F:binding; F:oxidoreductase activity
B. dothidea	53_S186_L007_g6411.t1			hfid_27	CYP2				p450	SP(Sec/SPI)					cytochrome P450	F:iron ion binding; C:membrane; F:oxidoreductase activity, acting on paired donors, with incorporation or reduction of molecular oxygen; F:heme binding; P:oxidation-reduction process
B. dothidea	53_S186_L007_g6584.t1			hfid_30	CYP2				RINGv		3.A.16	The_Endoplasmic_Reticular_Retrotranslocon_(ER-RT)_Family	_Primary_Active_Transporters	3.A.16.1.2	RING finger membrane protein	F:zinc ion binding; C:membrane; C:integral component of membrane; F:ligase activity; F:metal ion binding
B. dothidea	53_S186_L007_g8934.t1			hfid_58	CYP2				Glyoxalase						trihydroxytoluene oxygenase	P:metabolic process; F:oxidoreductase activity
B. dothidea	53_S186_L007_g921.t1			hfid_58	CYP2				p450						cytochrome P450	F:iron ion binding; F:oxidoreductase activity, acting on paired donors, with incorporation or reduction of molecular oxygen; F:heme binding; P:oxidation-reduction process
B. dothidea	53_S186_L007_g9475.t1		NRPS-like	hfid_45	CYP2				p450						cytochrome P450	C:membrane; F:oxidoreductase activity; F:metal ion binding
B. dothidea	53_S186_L007_g4287.t1			hfid_333	CYP27				Methyltransf_4						tRNA (guanine-N(7)-)-methyltransferase	F:tRNA binding; C:nucleus; F:tRNA (guanine-N7-)-methyltransferase activity; P:tRNA (guanine-N7)-methylation
B. dothidea	53_S186_L007_g10185.t1	Leucinostatins	T1PKS|NRPS	hfid_102	CYP3				p450						cytochrome P450	F:monooxygenase activity; F:iron ion binding; F:oxidoreductase activity, acting on paired donors, with incorporation or reduction of molecular oxygen; F:transferase activity; F:heme binding; P:oxidation-reduction process
B. dothidea	53_S186_L007_g10190.t1	Leucinostatins	T1PKS|NRPS	hfid_102	CYP3				p450						putative benzoate 4-monooxygenase cytochrome p450 protein	F:monooxygenase activity; F:iron ion binding; C:integral component of membrane; F:oxidoreductase activity, acting on paired donors, with incorporation or reduction of molecular oxygen; F:heme binding; P:oxidation-reduction process
B. dothidea	53_S186_L007_g11366.t1			hfid_67	CYP3				p450						cytochrome P450 3A9	F:monooxygenase activity; F:iron ion binding; F:FMN binding; C:membrane; F:oxidoreductase activity, acting on paired donors, with incorporation or reduction of molecular oxygen; F:heme binding; P:oxidation-reduction process
B. dothidea	53_S186_L007_g11700.t1			hfid_96	CYP3				AA_permease_2		2.A.3	The_Amino_Acid-Polyamine-Organocation_(APC)_Family	_Electrochemical_Potential-driven_Transporters	2.A.3.4.2	amino acid permease	P:amino acid transport; C:integral component of membrane; F:transmembrane transporter activity; P:transmembrane transport
B. dothidea	53_S186_L007_g12192.t1			hfid_96	CYP3				AA_permease_2		2.A.3	The_Amino_Acid-Polyamine-Organocation_(APC)_Family	_Electrochemical_Potential-driven_Transporters	2.A.3.4.1	amino acid permease	P:phospholipid biosynthetic process; C:integral component of membrane; F:phosphotransferase activity, for other substituted phosphate groups; F:transmembrane transporter activity; P:transmembrane transport
B. dothidea	53_S186_L007_g2392.t1			hfid_96	CYP3				p450						Unspecific monooxygenase	F:binding; F:oxidoreductase activity
B. dothidea	53_S186_L007_g3059.t1			hfid_81	CYP3				p450	SP(Sec/SPI)					cytochrome P450	F:binding; F:oxidoreductase activity
B. dothidea	53_S186_L007_g3103.t1			hfid_114	CYP3				p450						cytochrome P450	F:monooxygenase activity; F:iron ion binding; C:integral component of membrane; F:oxidoreductase activity, acting on paired donors, with incorporation or reduction of molecular oxygen; F:heme binding; P:oxidation-reduction process
B. dothidea	53_S186_L007_g3601.t1			hfid_94	CYP3				p450						cytochrome p450	F:monooxygenase activity; F:iron ion binding; C:cellular_component; C:membrane; C:integral component of membrane; F:oxidoreductase activity; F:oxidoreductase activity, acting on paired donors, with incorporation or reduction of molecular oxygen; F:heme binding; F:metal ion binding; P:oxidation-reduction process
B. dothidea	53_S186_L007_g4200.t1			hfid_64	CYP3				p450						cytochrome P450	C:membrane; F:oxidoreductase activity; F:metal ion binding
B. dothidea	53_S186_L007_g4586.t1	Brefeldin	T1PKS|NRPS	hfid_102	CYP3				p450						cytochrome P450	F:monooxygenase activity; F:iron ion binding; F:oxidoreductase activity, acting on paired donors, with incorporation or reduction of molecular oxygen; F:heme binding; P:oxidation-reduction process
B. dothidea	53_S186_L007_g5405.t1			hfid_102	CYP3				p450	SP(Sec/SPI)					cytochrome P450	F:binding; F:oxidoreductase activity
B. dothidea	53_S186_L007_g5462.t1			hfid_101	CYP3				p450						benzoate 4-monooxygenase cytochrome P450	F:binding; F:oxidoreductase activity
B. dothidea	53_S186_L007_g5482.t1			hfid_96	CYP3				AA_permease_2		2.A.3	The_Amino_Acid-Polyamine-Organocation_(APC)_Family	_Electrochemical_Potential-driven_Transporters	2.A.3.4.1	amino acid permease	C:integral component of membrane; F:transmembrane transporter activity; P:transmembrane transport
B. dothidea	53_S186_L007_g6124.t1		T1PKS	hfid_114	CYP3				p450						benzoate 4-monooxygenase cytochrome P450	C:membrane; F:oxidoreductase activity; F:metal ion binding
B. dothidea	53_S186_L007_g6547.t1			hfid_69	CYP3				p450						benzoate 4-monooxygenase cytochrome P450	C:membrane; F:oxidoreductase activity; F:metal ion binding
B. dothidea	53_S186_L007_g6590.t1			hfid_96	CYP3				AA_permease_2		2.A.3	The_Amino_Acid-Polyamine-Organocation_(APC)_Family	_Electrochemical_Potential-driven_Transporters	2.A.3.4.2	GABA permease	P:amino acid transport; C:integral component of membrane; F:transmembrane transporter activity; P:transmembrane transport
B. dothidea	53_S186_L007_g6711.t1			hfid_88	CYP3				p450						cytochrome P450	F:iron ion binding; C:integral component of membrane; F:oxidoreductase activity, acting on paired donors, with incorporation or reduction of molecular oxygen; F:heme binding; P:oxidation-reduction process
B. dothidea	53_S186_L007_g681.t1			hfid_94	CYP3				p450	SP(Sec/SPI)					Cytochrome P450	F:monooxygenase activity; F:iron ion binding; C:membrane; F:oxidoreductase activity, acting on paired donors, with incorporation or reduction of molecular oxygen; F:heme binding; P:oxidation-reduction process
B. dothidea	53_S186_L007_g7178.t1			hfid_99	CYP3				p450						cytochrome P450	F:iron ion binding; F:oxidoreductase activity, acting on paired donors, with incorporation or reduction of molecular oxygen; F:heme binding; P:oxidation-reduction process
B. dothidea	53_S186_L007_g7480.t1			hfid_96	CYP3				AA_permease_2		2.A.3	The_Amino_Acid-Polyamine-Organocation_(APC)_Family	_Electrochemical_Potential-driven_Transporters	2.A.3.4.2	polyamine transporter TPO5	C:integral component of membrane; F:transmembrane transporter activity; P:transmembrane transport
B. dothidea	53_S186_L007_g8390.t1		T1PKS	hfid_88	CYP3				p450						cytochrome P450	F:iron ion binding; C:membrane; F:oxidoreductase activity, acting on paired donors, with incorporation or reduction of molecular oxygen; F:heme binding; P:oxidation-reduction process
B. dothidea	53_S186_L007_g8778.t1			hfid_111	CYP3				p450						Isotrichodermin C-15 hydroxylase	F:monooxygenase activity; F:iron ion binding; C:integral component of membrane; F:oxidoreductase activity, acting on paired donors, with incorporation or reduction of molecular oxygen; F:heme binding; P:oxidation-reduction process
B. dothidea	53_S186_L007_g9010.t1			hfid_95	CYP3				p450						cytochrome P450 monooxygenase	F:monooxygenase activity; F:iron ion binding; P:steroid metabolic process; F:oxidoreductase activity, acting on paired donors, with incorporation or reduction of molecular oxygen; F:heme binding; P:oxidation-reduction process
B. dothidea	53_S186_L007_g9082.t1			hfid_96	CYP3				AA_permease_2		2.A.3	The_Amino_Acid-Polyamine-Organocation_(APC)_Family	_Electrochemical_Potential-driven_Transporters	2.A.3.4.1	amino acid permease, putative	C:integral component of membrane; F:transmembrane transporter activity; P:transmembrane transport
B. dothidea	53_S186_L007_g9177.t1		betalactone	hfid_101	CYP3				p450;AMP-binding						acetyl-CoA synthetase-like protein	F:ligase activity
B. dothidea	53_S186_L007_g9247.t1			hfid_96	CYP3				AA_permease_2		2.A.3	The_Amino_Acid-Polyamine-Organocation_(APC)_Family	_Electrochemical_Potential-driven_Transporters	2.A.3.4.2	amino acid permease	C:integral component of membrane; F:transmembrane transporter activity; P:transmembrane transport
B. dothidea	53_S186_L007_g9347.t1			hfid_96	CYP3				AA_permease_2		2.A.3	The_Amino_Acid-Polyamine-Organocation_(APC)_Family	_Electrochemical_Potential-driven_Transporters	2.A.3.4.1	choline transport protein	P:amino acid transport; F:choline transmembrane transporter activity; P:choline transport; C:integral component of membrane; P:glycine betaine transport; F:ethanolamine transmembrane transporter activity; P:ethanolamine transport; F:(R)-carnitine transmembrane transporter activity; P:(R)-carnitine transmembrane transport
B. dothidea	53_S186_L007_g9606.t1			hfid_99	CYP3				p450						cytochrome P450	F:monooxygenase activity; F:iron ion binding; C:membrane; C:integral component of membrane; F:oxidoreductase activity; F:oxidoreductase activity, acting on paired donors, with incorporation or reduction of molecular oxygen; F:heme binding; F:metal ion binding; P:oxidation-reduction process
B. dothidea	53_S186_L007_g11253.t1			hfid_149	CYP4				p450						putative cytochrome p450 protein	F:oxidoreductase activity; F:metal ion binding
B. dothidea	53_S186_L007_g11788.t1			hfid_186	CYP4				PHD;ARID;JmjC;JmjN;zf-C5HC2;PLU-1						histone demethylase JARID1D	F:DNA binding; P:chromatin remodeling; P:histone demethylation; F:histone demethylase activity (H3-trimethyl-K4 specific); C:histone methyltransferase complex; F:metal ion binding
B. dothidea	53_S186_L007_g1191.t1			hfid_126	CYP4				p450						putative cytochrome p450 protein	F:iron ion binding; C:integral component of membrane; F:oxidoreductase activity, acting on paired donors, with incorporation or reduction of molecular oxygen; F:heme binding; P:oxidation-reduction process
B. dothidea	53_S186_L007_g2055.t1			hfid_162	CYP4				Nop;NOP5NT						pre-rRNA processing nucleolar protein-like protein Sik1	C:integral component of membrane
B. dothidea	53_S186_L007_g7391.t1		NRPS	hfid_126	CYP4				p450						cytochrome P450 oxidoreductase	F:monooxygenase activity; F:iron ion binding; C:membrane; C:integral component of membrane; F:oxidoreductase activity; F:oxidoreductase activity, acting on paired donors, with incorporation or reduction of molecular oxygen; F:heme binding; F:metal ion binding; P:oxidation-reduction process
B. dothidea	53_S186_L007_g7864.t1	Mycophenolic_acid	T1PKS	hfid_126	CYP4				p450						cytochrome P450	F:oxidoreductase activity
B. dothidea	53_S186_L007_g8095.t1			hfid_155	CYP4						1.F.2	The_Octameric_Exocyst_(Exocyst)_Family	_Channels/Pores	1.F.2.1.1	putative involucrin repeat protein
B. dothidea	53_S186_L007_g8420.t1			hfid_151	CYP4										predicted protein	F:molecular_function; C:cellular_component; P:biological_process; C:membrane; C:integral component of membrane
B. dothidea	53_S186_L007_g8429.t1			hfid_149	CYP4				p450						putative cytochrome p450 protein	F:monooxygenase activity; F:iron ion binding; F:oxidoreductase activity, acting on paired donors, with incorporation or reduction of molecular oxygen; F:heme binding; P:oxidation-reduction process
B. dothidea	53_S186_L007_g9484.t1			hfid_149	CYP4				p450;Arylsulfotran_2	SP(Sec/SPI)					cytochrome P450, putative	F:oxidoreductase activity; F:metal ion binding
B. dothidea	53_S186_L007_g10315.t1			hfid_369	CYP46				p450						putative cytochrome p450 protein	C:membrane; F:oxidoreductase activity; F:metal ion binding
B. dothidea	53_S186_L007_g10843.t1			hfid_368	CYP46				p450						putative cytochrome p450 protein	C:membrane; F:oxidoreductase activity; F:metal ion binding
B. dothidea	53_S186_L007_g11298.t1			hfid_368	CYP46				p450						putative cytochrome p450 protein	F:monooxygenase activity; F:iron ion binding; F:oxidoreductase activity, acting on paired donors, with incorporation or reduction of molecular oxygen; F:heme binding; P:oxidation-reduction process
B. dothidea	53_S186_L007_g12293.t1			hfid_370	CYP46				p450						cytochrome P450	F:monooxygenase activity; F:iron ion binding; C:membrane; C:integral component of membrane; F:oxidoreductase activity; F:oxidoreductase activity, acting on paired donors, with incorporation or reduction of molecular oxygen; F:heme binding; F:metal ion binding; P:oxidation-reduction process
B. dothidea	53_S186_L007_g3614.t1			hfid_368	CYP46				p450						putative cytochrome p450 protein	F:monooxygenase activity; F:iron ion binding; C:integral component of membrane; F:oxidoreductase activity, acting on paired donors, with incorporation or reduction of molecular oxygen; F:heme binding; P:oxidation-reduction process
B. dothidea	53_S186_L007_g3760.t1			hfid_368	CYP46				p450						putative cytochrome p450 protein	C:membrane; F:oxidoreductase activity; F:metal ion binding
B. dothidea	53_S186_L007_g3960.t1			hfid_368	CYP46				p450;HET						putative cytochrome p450 protein	F:binding; F:oxidoreductase activity
B. dothidea	53_S186_L007_g5106.t1	NG-391	NRPS|T1PKS	hfid_365	CYP46				p450;Aldedh						cytochrome P450 CYP5313	F:monooxygenase activity; F:iron ion binding; C:membrane; F:oxidoreductase activity, acting on paired donors, with incorporation or reduction of molecular oxygen; F:heme binding; P:oxidation-reduction process
B. dothidea	53_S186_L007_g5464.t1			hfid_368	CYP46				p450						putative cytochrome p450 protein	C:membrane; F:oxidoreductase activity; F:metal ion binding
B. dothidea	53_S186_L007_g5749.t1			hfid_370	CYP46				p450						putative cytochrome p450 protein	F:monooxygenase activity; F:iron ion binding; F:oxidoreductase activity, acting on paired donors, with incorporation or reduction of molecular oxygen; F:heme binding; P:oxidation-reduction process
B. dothidea	53_S186_L007_g5938.t1			hfid_368	CYP46				p450						putative cytochrome p450 protein	F:monooxygenase activity; F:iron ion binding; C:integral component of membrane; F:oxidoreductase activity, acting on paired donors, with incorporation or reduction of molecular oxygen; F:heme binding; P:oxidation-reduction process
B. dothidea	53_S186_L007_g5963.t1			hfid_368	CYP46				p450						putative cytochrome p450 protein	F:binding; F:oxidoreductase activity
B. dothidea	53_S186_L007_g6033.t1			hfid_368	CYP46				p450						putative cytochrome p450 protein	F:oxidoreductase activity; F:metal ion binding
B. dothidea	53_S186_L007_g6120.t1		T1PKS	hfid_368	CYP46				p450						putative cytochrome p450 protein	F:monooxygenase activity; F:iron ion binding; C:integral component of membrane; F:oxidoreductase activity, acting on paired donors, with incorporation or reduction of molecular oxygen; F:heme binding; P:oxidation-reduction process
B. dothidea	53_S186_L007_g6347.t1			hfid_370	CYP46				p450						putative cytochrome p450 protein	F:oxidoreductase activity; F:metal ion binding
B. dothidea	53_S186_L007_g6821.t1			hfid_368	CYP46				p450						putative cytochrome p450 protein	F:binding; F:oxidoreductase activity
B. dothidea	53_S186_L007_g7561.t1			hfid_368	CYP46				p450						putative cytochrome p450 protein	F:monooxygenase activity; F:iron ion binding; F:oxidoreductase activity, acting on paired donors, with incorporation or reduction of molecular oxygen; F:heme binding; P:oxidation-reduction process
B. dothidea	53_S186_L007_g7900.t1			hfid_366	CYP46				p450						putative cytochrome p450 protein	F:oxidoreductase activity; F:metal ion binding
B. dothidea	53_S186_L007_g8254.t1			hfid_368	CYP46				p450;SIR2						putative cytochrome p450 protein	F:monooxygenase activity; F:iron ion binding; F:zinc ion binding; C:integral component of membrane; P:histone deacetylation; F:oxidoreductase activity, acting on paired donors, with incorporation or reduction of molecular oxygen; F:NAD-dependent histone deacetylase activity; F:heme binding; P:oxidation-reduction process; F:NAD+ binding
B. dothidea	53_S186_L007_g8606.t1		T1PKS	hfid_368	CYP46				p450						putative cytochrome p450 protein	C:membrane; F:oxidoreductase activity; F:metal ion binding
B. dothidea	53_S186_L007_g8631.t1			hfid_368	CYP46				p450						putative cytochrome p450 protein	F:binding; F:oxidoreductase activity
B. dothidea	53_S186_L007_g9492.t1			hfid_370	CYP46				p450						cytochrome P450	F:oxidoreductase activity; F:metal ion binding
B. dothidea	53_S186_L007_g9660.t1			hfid_368	CYP46				p450						putative cytochrome p450 protein	F:oxidoreductase activity; F:metal ion binding
B. dothidea	53_S186_L007_g9972.t1			hfid_368	CYP46				p450						putative cytochrome p450 protein	F:monooxygenase activity; F:iron ion binding; C:integral component of membrane; F:oxidoreductase activity, acting on paired donors, with incorporation or reduction of molecular oxygen; F:heme binding; P:oxidation-reduction process
B. dothidea	53_S186_L007_g3876.t1			hfid_372	CYP49				DUF2722
B. dothidea	53_S186_L007_g4661.t1			hfid_372	CYP49				DUF2985						integral membrane protein	C:integral component of membrane
B. dothidea	53_S186_L007_g6764.t1			hfid_372	CYP49				NAD_kinase						ATP-NAD kinase	F:NAD+ kinase activity; P:NADP biosynthetic process; P:phosphorylation; P:NAD metabolic process
B. dothidea	53_S186_L007_g10698.t1			hfid_188	CYP5				p450						cytochrome P450	F:monooxygenase activity; F:iron ion binding; F:oxidoreductase activity, acting on paired donors, with incorporation or reduction of molecular oxygen; F:heme binding; P:oxidation-reduction process
B. dothidea	53_S186_L007_g11873.t1			hfid_189	CYP5				p450						Pfs, NACHT and Ankyrin domain protein	F:nucleotide binding; C:membrane; F:oxidoreductase activity; F:metal ion binding
B. dothidea	53_S186_L007_g6046.t1	Aspirochlorine	NRPS	hfid_189	CYP5				p450						cytochrome P450	F:monooxygenase activity; F:iron ion binding; C:membrane; C:integral component of membrane; F:oxidoreductase activity; F:oxidoreductase activity, acting on paired donors, with incorporation or reduction of molecular oxygen; F:heme binding; F:metal ion binding; P:oxidation-reduction process
B. dothidea	53_S186_L007_g6109.t1		T1PKS	hfid_189	CYP5				p450						cytochrome P450	F:monooxygenase activity; F:iron ion binding; C:membrane; C:integral component of membrane; F:oxidoreductase activity; F:oxidoreductase activity, acting on paired donors, with incorporation or reduction of molecular oxygen; F:heme binding; F:metal ion binding; P:oxidation-reduction process
B. dothidea	53_S186_L007_g8822.t1			hfid_189	CYP5				p450						cytochrome P450	F:monooxygenase activity; F:iron ion binding; C:membrane; C:integral component of membrane; F:oxidoreductase activity; F:oxidoreductase activity, acting on paired donors, with incorporation or reduction of molecular oxygen; F:heme binding; F:metal ion binding; P:oxidation-reduction process
B. dothidea	53_S186_L007_g8068.t1	PR	T1PKS|NRPS|terpene	hfid_1398	CYP503				p450						cytochrome P450	F:monooxygenase activity; F:iron ion binding; C:membrane; C:integral component of membrane; F:oxidoreductase activity; F:oxidoreductase activity, acting on paired donors, with incorporation or reduction of molecular oxygen; F:heme binding; F:metal ion binding; P:oxidation-reduction process
B. dothidea	53_S186_L007_g8071.t1	PR	T1PKS|NRPS|terpene	hfid_1398	CYP503				p450						cytochrome P450	C:membrane; F:oxidoreductase activity; F:metal ion binding; F:cofactor binding; F:organic cyclic compound binding; F:heterocyclic compound binding
B. dothidea	53_S186_L007_g8084.t1			hfid_1398	CYP503				p450						Cytochrome P450	F:binding; F:oxidoreductase activity
B. dothidea	53_S186_L007_g10022.t1			hfid_1401	CYP504				adh_short_C2						glucose 1-dehydrogenase	F:glucose 1-dehydrogenase [NAD(P)] activity; P:oxidation-reduction process
B. dothidea	53_S186_L007_g10111.t1			hfid_1401	CYP504				adh_short;adh_short_C2						NAD(P)-binding protein	C:transcription export complex; C:THO complex part of transcription export complex; P:mRNA export from nucleus; C:membrane; C:integral component of membrane; F:oxidoreductase activity; P:oxidation-reduction process
B. dothidea	53_S186_L007_g10194.t1			hfid_1401	CYP504				Acetyltransf_1						GNAT family acetyltransferase, putative	F:protein kinase activity; F:ATP binding; P:protein phosphorylation; F:transferase activity
B. dothidea	53_S186_L007_g10243.t1			hfid_1401	CYP504				adh_short						retinol dehydrogenase 12
B. dothidea	53_S186_L007_g10316.t1			hfid_1401	CYP504				Acetyltransf_10						putative gnat family protein	F:transferase activity
B. dothidea	53_S186_L007_g10367.t1			hfid_1401	CYP504				adh_short_C2						short chain dehydrogenase/reductase family oxidoreductase
B. dothidea	53_S186_L007_g10422.t1			hfid_1401	CYP504				adh_short_C2						short chain dehydrogenase reductase	F:magnesium ion binding; F:oxidoreductase activity, acting on the CH-OH group of donors, NAD or NADP as acceptor; F:NAD binding; P:oxidation-reduction process
B. dothidea	53_S186_L007_g10423.t1			hfid_1401	CYP504				p450						phenylacetate 2-hydroxylase	F:iron ion binding; C:membrane; F:oxidoreductase activity, acting on paired donors, with incorporation or reduction of molecular oxygen; F:heme binding; P:oxidation-reduction process
B. dothidea	53_S186_L007_g10880.t1			hfid_1404	CYP504				p450						cytochrome P450 phenylacetate 2-hydroxylase, putative	F:iron ion binding; C:integral component of membrane; F:oxidoreductase activity, acting on paired donors, with incorporation or reduction of molecular oxygen; F:heme binding; P:oxidation-reduction process
B. dothidea	53_S186_L007_g10945.t1			hfid_1401	CYP504				adh_short;adh_short_C2						2-(R)-hydroxypropyl-CoM dehydrogenase	F:oxidoreductase activity; P:oxidation-reduction process
B. dothidea	53_S186_L007_g10988.t1			hfid_1401	CYP504				adh_short_C2						short chain dehydrogenase reductase family	F:oxidoreductase activity; P:oxidation-reduction process
B. dothidea	53_S186_L007_g11158.t1			hfid_1401	CYP504				adh_short						putative 3-oxoacyl-(acyl-carrier-protein) reductase protein	F:oxidoreductase activity; P:oxidation-reduction process
B. dothidea	53_S186_L007_g11321.t1			hfid_1401	CYP504				adh_short_C2						oxidoreductase, short chain dehydrogenase/reductase family	F:ribonuclease III activity; P:RNA processing; F:oxidoreductase activity; P:oxidation-reduction process; P:RNA phosphodiester bond hydrolysis, endonucleolytic
B. dothidea	53_S186_L007_g11407.t1			hfid_1401	CYP504				Acetyltransf_7						predicted protein	F:transferase activity; F:transferase activity, transferring acyl groups
B. dothidea	53_S186_L007_g11435.t1			hfid_1401	CYP504				adh_short_C2						NAD(P)-binding protein	F:oxidoreductase activity; P:oxidation-reduction process
B. dothidea	53_S186_L007_g11542.t1			hfid_1401	CYP504				adh_short_C2						L-xylulose reductase	F:oxidoreductase activity, acting on NAD(P)H, oxygen as acceptor; P:oxidation-reduction process
B. dothidea	53_S186_L007_g11722.t1			hfid_1401	CYP504				adh_short_C2						3-ketoacyl-acyl carrier protein reductase	C:membrane; C:integral component of membrane; F:oxidoreductase activity; P:transmembrane transport; P:oxidation-reduction process
B. dothidea	53_S186_L007_g11957.t1			hfid_1401	CYP504				adh_short_C2						putative short chain dehydrogenase/ reductase	F:oxidoreductase activity; P:oxidation-reduction process
B. dothidea	53_S186_L007_g12073.t1			hfid_1402	CYP504				p450						cytochrome P450 phenylacetate 2-hydroxylase, putative	F:iron ion binding; F:oxidoreductase activity, acting on paired donors, with incorporation or reduction of molecular oxygen; F:heme binding; P:oxidation-reduction process
B. dothidea	53_S186_L007_g12191.t1			hfid_1401	CYP504				adh_short						short chain dehydrogenase/reductase	F:oxidoreductase activity; P:oxidation-reduction process
B. dothidea	53_S186_L007_g1395.t1			hfid_1401	CYP504				adh_short_C2						oxidoreductase, short-chain dehydrogenase/reductase family	F:oxidoreductase activity; P:oxidation-reduction process
B. dothidea	53_S186_L007_g1631.t1			hfid_1401	CYP504				adh_short_C2						short chain dehydrogenase/reductase family oxidoreductase	F:oxidoreductase activity; P:oxidation-reduction process
B. dothidea	53_S186_L007_g1781.t1			hfid_1401	CYP504				adh_short_C2						gluconate 5-dehydrogenase	F:oxidoreductase activity; P:oxidation-reduction process
B. dothidea	53_S186_L007_g1837.t1			hfid_1401	CYP504										putative gnat family protein	F:transferase activity
B. dothidea	53_S186_L007_g1888.t1			hfid_1402	CYP504				p450						phenylacetate 2-hydroxylase	F:iron ion binding; C:integral component of membrane; F:heme binding; P:oxidation-reduction process; F:aromatase activity
B. dothidea	53_S186_L007_g1968.t1			hfid_1401	CYP504				adh_short_C2						short-chain dehydrogenase	F:oxidoreductase activity; P:oxidation-reduction process
B. dothidea	53_S186_L007_g2205.t1			hfid_1401	CYP504				adh_short_C2						putative short-chain dehydrogenase reductase protein	F:oxidoreductase activity; P:oxidation-reduction process
B. dothidea	53_S186_L007_g2349.t1			hfid_1401	CYP504				adh_short_C2						oxidoreductase, short-chain dehydrogenase/reductase family	C:cellular_component; F:oxidoreductase activity; P:oxidation-reduction process
B. dothidea	53_S186_L007_g2370.t1			hfid_1401	CYP504				adh_short_C2						sporulation protein SPS19
B. dothidea	53_S186_L007_g2737.t1			hfid_1401	CYP504				adh_short_C2						short chain dehydrogenase/reductase	F:oxidoreductase activity; P:oxidation-reduction process
B. dothidea	53_S186_L007_g3152.t1			hfid_1401	CYP504				adh_short_C2						oxidoreductase ucpA	F:protein kinase activity; F:ATP binding; P:protein phosphorylation; C:membrane; F:oxidoreductase activity; P:oxidation-reduction process
B. dothidea	53_S186_L007_g3363.t1			hfid_1401	CYP504				adh_short_C2						oxidoreductase, short-chain dehydrogenase/reductase family	F:gluconate 5-dehydrogenase activity; P:oxidation-reduction process
B. dothidea	53_S186_L007_g353.t1			hfid_1401	CYP504				Acetyltransf_10						acyl-CoA N-acyltransferase	F:transferase activity; F:transferase activity, transferring acyl groups
B. dothidea	53_S186_L007_g3655.t1			hfid_1401	CYP504				adh_short_C2						versicolorin reductase	F:oxidoreductase activity; P:oxidation-reduction process
B. dothidea	53_S186_L007_g3893.t1			hfid_1401	CYP504				adh_short_C2						short chain alcohol dehydrogenase	F:oxidoreductase activity; P:oxidation-reduction process
B. dothidea	53_S186_L007_g3934.t1			hfid_1402	CYP504				DAO;FAD_binding_3						mannitol 1-phosphate dehydrogenase	C:integral component of membrane; P:secondary metabolite biosynthetic process; F:FAD binding
B. dothidea	53_S186_L007_g4140.t1			hfid_1401	CYP504				adh_short_C2						tetrahydroxynaphthalene reductase	F:oxidoreductase activity; P:oxidation-reduction process
B. dothidea	53_S186_L007_g4236.t1			hfid_1401	CYP504				adh_short_C2						3-oxoacyl-(acyl-carrier-protein) reductase	F:3-oxoacyl-[acyl-carrier-protein] reductase (NADPH) activity; P:oxidation-reduction process; F:3-oxo-glutaryl-[acp] methyl ester reductase activity; F:3-oxo-pimeloyl-[acp] methyl ester reductase activity
B. dothidea	53_S186_L007_g4362.t1			hfid_1401	CYP504				adh_short						NAD(P)-binding protein	F:oxidoreductase activity; P:oxidation-reduction process
B. dothidea	53_S186_L007_g4473.t1			hfid_1401	CYP504				adh_short_C2						putative d-arabinitol 2-dehydrogenase protein	F:oxidoreductase activity; P:oxidation-reduction process
B. dothidea	53_S186_L007_g4485.t1			hfid_1401	CYP504				adh_short_C2						oxidoreductase, short chain dehydrogenase/reductase family	F:oxidoreductase activity; P:oxidation-reduction process
B. dothidea	53_S186_L007_g4716.t1			hfid_1401	CYP504				adh_short_C2						short chain dehydrogenase
B. dothidea	53_S186_L007_g4758.t1			hfid_1401	CYP504				adh_short						putative short-chain dehydrogenase/reductase	F:oxidoreductase activity; P:oxidation-reduction process
B. dothidea	53_S186_L007_g4963.t1			hfid_1401	CYP504				adh_short_C2						NAD(P)-binding protein	F:oxidoreductase activity; P:oxidation-reduction process
B. dothidea	53_S186_L007_g5078.t1			hfid_1401	CYP504				adh_short_C2						NAD(P)-binding protein	F:oxidoreductase activity, acting on the CH-OH group of donors, NAD or NADP as acceptor; P:oxidation-reduction process
B. dothidea	53_S186_L007_g5125.t1			hfid_1401	CYP504				adh_short_C2						short-chain dehydrogenase/reductase family protein	F:oxidoreductase activity; P:oxidation-reduction process
B. dothidea	53_S186_L007_g5427.t1			hfid_1401	CYP504				adh_short_C2						NAD(P)-binding protein	F:oxidoreductase activity; P:oxidation-reduction process
B. dothidea	53_S186_L007_g5483.t1			hfid_1401	CYP504				Acetyltransf_7						putative gnat family protein
B. dothidea	53_S186_L007_g5750.t1			hfid_1401	CYP504				adh_short_C2						NAD(P)-binding protein	F:oxidoreductase activity; P:oxidation-reduction process
B. dothidea	53_S186_L007_g576.t1			hfid_1401	CYP504				adh_short_C2						tropinone reductase 1	F:oxidoreductase activity; P:oxidation-reduction process
B. dothidea	53_S186_L007_g5915.t1			hfid_1401	CYP504				Acetyltransf_1						acyl-CoA N-acyltransferase	F:transferase activity
B. dothidea	53_S186_L007_g6032.t1			hfid_1401	CYP504				adh_short_C2						oxidoreductase, short chain dehydrogenase/reductase family	F:ribonuclease III activity; P:RNA processing; F:oxidoreductase activity, acting on NAD(P)H, oxygen as acceptor; P:oxidation-reduction process; P:RNA phosphodiester bond hydrolysis, endonucleolytic
B. dothidea	53_S186_L007_g6221.t1			hfid_1401	CYP504				adh_short_C2						oxidoreductase, short-chain dehydrogenase/reductase family	C:cellular_component
B. dothidea	53_S186_L007_g6251.t1			hfid_1401	CYP504				adh_short_C2						oxidoreductase, short chain dehydrogenase/reductase family	F:oxidoreductase activity, acting on the CH-OH group of donors, NAD or NADP as acceptor; P:oxidation-reduction process
B. dothidea	53_S186_L007_g6534.t1			hfid_1401	CYP504				adh_short_C2						short-chain dehydrogenase, putative	F:oxidoreductase activity; P:oxidation-reduction process
B. dothidea	53_S186_L007_g6542.t1			hfid_1401	CYP504				Acetyltransf_1						putative phenylacetate 2-hydroxylase protein	F:iron ion binding; F:oxidoreductase activity, acting on paired donors, with incorporation or reduction of molecular oxygen; F:heme binding; P:oxidation-reduction process
B. dothidea	53_S186_L007_g6543.t1			hfid_1401	CYP504				p450						phenylacetate 2-hydroxylase	F:iron ion binding; C:integral component of membrane; F:oxidoreductase activity, acting on paired donors, with incorporation or reduction of molecular oxygen; F:heme binding; P:oxidation-reduction process
B. dothidea	53_S186_L007_g6600.t1			hfid_1401	CYP504				adh_short_C2						D-arabinitol 2-dehydrogenase	F:oxidoreductase activity, acting on the CH-OH group of donors, NAD or NADP as acceptor; P:oxidation-reduction process
B. dothidea	53_S186_L007_g6720.t1			hfid_1401	CYP504				adh_short_C2						putative short chain dehydrogenase reductase family oxidoreductase protein
B. dothidea	53_S186_L007_g6858.t1			hfid_1401	CYP504				adh_short_C2						Short-chain dehydrogenase	F:oxidoreductase activity; P:oxidation-reduction process
B. dothidea	53_S186_L007_g6899.t1			hfid_1401	CYP504				adh_short_C2						NAD(P)-binding protein
B. dothidea	53_S186_L007_g6962.t1			hfid_1401	CYP504				adh_short;adh_short_C2						NAD(P)-binding protein	C:transcription export complex; P:metabolic process; C:integral component of membrane
B. dothidea	53_S186_L007_g7200.t1			hfid_1405	CYP504				p450						cytochrome P450	F:iron ion binding; C:integral component of membrane; F:heme binding; P:oxidation-reduction process; F:aromatase activity
B. dothidea	53_S186_L007_g7578.t1			hfid_1401	CYP504				adh_short						short chain dehydrogenase	F:DNA binding; C:nucleus; P:transcription, DNA-templated; F:zinc ion binding
B. dothidea	53_S186_L007_g7713.t1			hfid_1401	CYP504				adh_short_C2						gluconate 5-dehydrogenase	C:cellular_component; F:acetyltransferase activity; F:oxidoreductase activity; F:D-arabinitol 4-dehydrogenase activity; P:oxidation-reduction process
B. dothidea	53_S186_L007_g7870.t1	Mycophenolic_acid	T1PKS	hfid_1401	CYP504				adh_short						short-chain oxidoreductase, putative	C:integral component of membrane; F:oxidoreductase activity; P:oxidation-reduction process
B. dothidea	53_S186_L007_g7991.t1			hfid_1401	CYP504				adh_short						putative short-chain dehydrogenases protein
B. dothidea	53_S186_L007_g8433.t1			hfid_1401	CYP504				Acetyltransf_1						putative gnat family protein	F:transferase activity; F:transferase activity, transferring acyl groups
B. dothidea	53_S186_L007_g8551.t1		NRPS-like	hfid_1401	CYP504				adh_short_C2						short chain alcohol dehydrogenase	P:tRNA processing; F:oxidoreductase activity; P:oxidation-reduction process
B. dothidea	53_S186_L007_g8596.t1		NRPS	hfid_1401	CYP504				adh_short						short-chain dehydrogenase/reductase SDR	P:secondary metabolic process
B. dothidea	53_S186_L007_g8886.t1			hfid_1401	CYP504				Zn_clus;Fungal_trans_2;adh_short_C2						Catalytic activity	P:regulation of transcription, DNA-templated; F:oxidoreductase activity, acting on the CH-OH group of donors, NAD or NADP as acceptor
B. dothidea	53_S186_L007_g8888.t1			hfid_1401	CYP504				adh_short_C2						3-oxoacyl-(acyl-carrier-protein) reductase 2	F:oxidoreductase activity; P:oxidation-reduction process
B. dothidea	53_S186_L007_g9180.t1		betalactone	hfid_1401	CYP504				adh_short_C2						gluconate 5-dehydrogenase	F:oxidoreductase activity; P:oxidation-reduction process
B. dothidea	53_S186_L007_g9476.t1		NRPS-like	hfid_1401	CYP504				adh_short_C2						3-oxoacyl-[acyl-carrier protein] reductase	F:FAD binding
B. dothidea	53_S186_L007_g9598.t1		terpene	hfid_1401	CYP504				adh_short_C2						Oxidoreductase ucpA	F:oxidoreductase activity; P:polyketide biosynthetic process; P:oxidation-reduction process
B. dothidea	53_S186_L007_g9730.t1			hfid_1401	CYP504				adh_short_C2						gluconate 5-dehydrogenase	F:3-oxoacyl-[acyl-carrier-protein] reductase (NADPH) activity; F:tetrahydroxynaphthalene reductase activity; P:oxidation-reduction process; F:3-oxo-glutaryl-[acp] methyl ester reductase activity; F:3-oxo-pimeloyl-[acp] methyl ester reductase activity
B. dothidea	53_S186_L007_g9857.t1			hfid_1401	CYP504				Acetyltransf_7						putative gnat family protein	F:DNA-binding transcription factor activity, RNA polymerase II-specific; C:cellular_component; C:nucleus; P:regulation of transcription, DNA-templated; P:regulation of transcription by RNA polymerase II; P:biological_process; F:zinc ion binding; F:transferase activity
B. dothidea	53_S186_L007_g9859.t1			hfid_1401	CYP504				adh_short_C2						short-chain dehydrogenase reductase family	F:peroxidase activity; F:heme binding; P:oxidation-reduction process; P:cellular oxidant detoxification
B. dothidea	53_S186_L007_g9869.t1			hfid_1401	CYP504				adh_short_C2						short chain dehydrogenase	F:gluconate 5-dehydrogenase activity; P:oxidation-reduction process
B. dothidea	53_S186_L007_g10071.t1	Aflatrem	T1PKS|terpene	hfid_1411	CYP505				p450						putative cytochrome p450 protein	F:oxidoreductase activity, acting on paired donors, with incorporation or reduction of molecular oxygen; F:metal ion binding
B. dothidea	53_S186_L007_g10083.t1	Aflatrem	T1PKS|terpene	hfid_1410	CYP505				p450						benzoate 4-monooxygenase cytochrome P450, putative	F:monooxygenase activity; F:iron ion binding; C:integral component of membrane; F:oxidoreductase activity, acting on paired donors, with incorporation or reduction of molecular oxygen; F:heme binding; P:oxidation-reduction process
B. dothidea	53_S186_L007_g10304.t1			hfid_1406	CYP505				RRM_1		3.A.18	The_Nuclear_mRNA_Exporter_(mRNA-E)_Family	_Primary_Active_Transporters	3.A.18.1.1	nucleolin protein Nsr1	C:dense fibrillar component; F:RNA binding; P:rRNA processing; F:nuclear localization sequence binding; C:ribonucleoprotein complex
B. dothidea	53_S186_L007_g10740.t1			hfid_1406	CYP505				RRM_1;CDC45		9.A.60	The_Small_Nuclear_RNA_Exporter_(snRNA-E)	_Incompletely_Characterized_Transport_Systems	9.A.60.1.1	ribosome biogenesis (Nop4)	F:RNA binding; C:nucleolus; C:ribonucleoprotein complex
B. dothidea	53_S186_L007_g10893.t1			hfid_1411	CYP505				p450						cytochrome P450	C:membrane; F:oxidoreductase activity; F:metal ion binding
B. dothidea	53_S186_L007_g11073.t1			hfid_1410	CYP505				p450						benzoate 4-monooxygenase	F:monooxygenase activity; F:iron ion binding; F:oxidoreductase activity, acting on paired donors, with incorporation or reduction of molecular oxygen; F:heme binding; P:oxidation-reduction process
B. dothidea	53_S186_L007_g11089.t1			hfid_1408	CYP505				NAD_binding_10						nucleoside-diphosphate-sugar epimerase, putative	F:molecular_function; F:catalytic activity; C:cellular_component; P:biological_process; F:coenzyme binding
B. dothidea	53_S186_L007_g12379.t1			hfid_1413	CYP505				p450						putative cytochrome p450 protein	F:monooxygenase activity; F:iron ion binding; F:oxidoreductase activity, acting on paired donors, with incorporation or reduction of molecular oxygen; F:heme binding; P:oxidation-reduction process
B. dothidea	53_S186_L007_g2352.t1			hfid_1406	CYP505				NAD_binding_1;Flavodoxin_1;FAD_binding_1						NADPH-dependent FMN/FAD containing oxidoreductase, putative	C:cytoplasm; F:FMN binding; F:oxidoreductase activity; P:oxidation-reduction process
B. dothidea	53_S186_L007_g322.t1			hfid_1408	CYP505				NAD_binding_10						nucleoside-diphosphate-sugar epimerase	F:molecular_function; C:cellular_component; P:biological_process
B. dothidea	53_S186_L007_g3346.t1			hfid_1408	CYP505										nucleoside-diphosphate-sugar epimerase	F:molecular_function; C:cellular_component; P:biological_process
B. dothidea	53_S186_L007_g3617.t1			hfid_1406	CYP505				RRM_1		9.A.60	The_Small_Nuclear_RNA_Exporter_(snRNA-E)	_Incompletely_Characterized_Transport_Systems	9.A.60.1.1	nuclear and cytoplasmic polyadenylated RNA-binding protein pub1	F:RNA binding; C:cytoplasmic stress granule; C:integral component of membrane
B. dothidea	53_S186_L007_g3940.t1			hfid_1413	CYP505				p450						putative cytochrome p450 protein	F:monooxygenase activity; F:iron ion binding; F:oxidoreductase activity, acting on paired donors, with incorporation or reduction of molecular oxygen; F:heme binding; P:oxidation-reduction process
B. dothidea	53_S186_L007_g4602.t1			hfid_1413	CYP505				p450						cytochrome P450	F:monooxygenase activity; F:iron ion binding; C:membrane; C:integral component of membrane; F:oxidoreductase activity; F:oxidoreductase activity, acting on paired donors, with incorporation or reduction of molecular oxygen; F:heme binding; F:metal ion binding; P:oxidation-reduction process
B. dothidea	53_S186_L007_g4667.t1			hfid_1406	CYP505				RRM_1		3.A.18	The_Nuclear_mRNA_Exporter_(mRNA-E)_Family	_Primary_Active_Transporters	3.A.18.1.1	putative u2 snrnp component ist3 protein	F:first spliceosomal transesterification activity; P:mRNA splicing, via spliceosome; F:RNA binding; C:U2 snRNP
B. dothidea	53_S186_L007_g5014.t1			hfid_1406	CYP505				NAD_binding_1;Flavodoxin_1;FAD_binding_1						NADPH cytochrome P450	F:NADPH-hemoprotein reductase activity; C:endoplasmic reticulum membrane; C:cytosol; F:FMN binding; F:flavin adenine dinucleotide binding; P:oxidation-reduction process
B. dothidea	53_S186_L007_g5406.t1			hfid_1413	CYP505				p450						benzoate 4-monooxygenase cytochrome P450, putative	F:monooxygenase activity; F:iron ion binding; C:membrane; C:integral component of membrane; F:oxidoreductase activity, acting on paired donors, with incorporation or reduction of molecular oxygen; F:heme binding; P:oxidation-reduction process
B. dothidea	53_S186_L007_g5499.t1			hfid_1413	CYP505				p450						putative cytochrome p450 protein	F:oxidoreductase activity
B. dothidea	53_S186_L007_g5867.t1			hfid_1407	CYP505				p450						cytochrome P450 67	F:monooxygenase activity; F:binding; C:membrane; F:oxidoreductase activity, acting on paired donors, with incorporation or reduction of molecular oxygen
B. dothidea	53_S186_L007_g6655.t1			hfid_1406	CYP505				RRM_1						putative sporulation-specific protein 5 protein	F:RNA binding; C:intracellular part
B. dothidea	53_S186_L007_g6656.t1			hfid_1406	CYP505				NAD_binding_1;Flavodoxin_1;FAD_binding_1						NADPH-cytochrome P450 reductase	F:NADPH-hemoprotein reductase activity; C:mitochondrial outer membrane; C:endoplasmic reticulum membrane; C:plasma membrane; P:ergosterol biosynthetic process; F:FMN binding; C:integral component of membrane; F:flavin adenine dinucleotide binding; F:NADP binding; P:oxidation-reduction process
B. dothidea	53_S186_L007_g7058.t1			hfid_1406	CYP505				RRM_1						RNP domain protein	F:RNA binding
B. dothidea	53_S186_L007_g7072.t1			hfid_1406	CYP505				RRM_1;PABP		9.A.60	The_Small_Nuclear_RNA_Exporter_(snRNA-E)	_Incompletely_Characterized_Transport_Systems	9.A.60.1.1	polyadenylate-binding protein, cytoplasmic and nuclear	F:poly(A) binding; C:cytoplasmic stress granule; P:negative regulation of nuclear-transcribed mRNA poly(A) tail shortening; C:post-mRNA release spliceosomal complex; P:negative regulation of exoribonuclease activity; P:positive regulation of exoribonuclease activity
B. dothidea	53_S186_L007_g7993.t1			hfid_1408	CYP505				NAD_binding_1;FAD_binding_1;POR;PFOR_II						putative assimilatory sulfite reductase protein	F:NADPH-hemoprotein reductase activity; C:cytosol; F:FMN binding; F:oxidoreductase activity, acting on the aldehyde or oxo group of donors; F:flavin adenine dinucleotide binding; P:oxidation-reduction process
B. dothidea	53_S186_L007_g8013.t1			hfid_1410	CYP505				p450						putative cytochrome p450 protein	F:monooxygenase activity; F:iron ion binding; F:oxidoreductase activity, acting on paired donors, with incorporation or reduction of molecular oxygen; F:heme binding; P:oxidation-reduction process
B. dothidea	53_S186_L007_g8300.t1			hfid_1406	CYP505				RRM_1		9.A.60	The_Small_Nuclear_RNA_Exporter_(snRNA-E)	_Incompletely_Characterized_Transport_Systems	9.A.60.1.1	putative splicing factor 3b subunit 4 protein	F:RNA binding
B. dothidea	53_S186_L007_g8499.t1			hfid_1407	CYP505				p450						cytochrome P450	F:binding; C:membrane; F:oxidoreductase activity, acting on paired donors, with incorporation or reduction of molecular oxygen
B. dothidea	53_S186_L007_g8696.t1			hfid_1411	CYP505				p450						putative cytochrome p450 protein	F:iron ion binding; F:oxidoreductase activity, acting on paired donors, with incorporation or reduction of molecular oxygen; F:heme binding; P:oxidation-reduction process
B. dothidea	53_S186_L007_g8712.t1			hfid_1409	CYP505				p450						Cytochrome P450	F:iron ion binding; C:integral component of membrane; F:oxidoreductase activity, acting on paired donors, with incorporation or reduction of molecular oxygen; F:heme binding; P:oxidation-reduction process
B. dothidea	53_S186_L007_g951.t1			hfid_1406	CYP505				RRM_1		3.A.18	The_Nuclear_mRNA_Exporter_(mRNA-E)_Family	_Primary_Active_Transporters	3.A.18.1.1	RNA-binding domain-containing protein	F:RNA binding; C:ribonucleoprotein complex
B. dothidea	53_S186_L007_g9819.t1			hfid_1406	CYP505				RRM_1		9.A.60	The_Small_Nuclear_RNA_Exporter_(snRNA-E)	_Incompletely_Characterized_Transport_Systems	9.A.60.1.1	RNA recognition domain-containing protein	F:RNA binding; F:methyltransferase activity; P:methylation
B. dothidea	53_S186_L007_g10221.t1		NRPS-like	hfid_1416	CYP506				p450						ent-kaurene oxidase	F:monooxygenase activity; F:iron ion binding; C:membrane; C:integral component of membrane; F:oxidoreductase activity; F:oxidoreductase activity, acting on paired donors, with incorporation or reduction of molecular oxygen; F:heme binding; F:metal ion binding; P:oxidation-reduction process
B. dothidea	53_S186_L007_g7989.t1			hfid_1416	CYP506				p450						cytochrome p450	F:binding; F:oxidoreductase activity
B. dothidea	53_S186_L007_g10168.t1	Leucinostatins	T1PKS|NRPS	hfid_1686	CYP5080				p450						cytochrome p450	F:binding; F:oxidoreductase activity
B. dothidea	53_S186_L007_g10524.t1			hfid_1686	CYP5080				p450						putative cytochrome p450 protein	F:iron ion binding; C:integral component of membrane; F:oxidoreductase activity, acting on paired donors, with incorporation or reduction of molecular oxygen; F:heme binding; P:oxidation-reduction process
B. dothidea	53_S186_L007_g11425.t1			hfid_1689	CYP5080				p450						cytochrome p450 oxidoreductase	P:metabolic process; F:oxidoreductase activity; F:metal ion binding
B. dothidea	53_S186_L007_g11639.t1			hfid_1686	CYP5080				p450						cytochrome P450 oxidoreductase	F:oxidoreductase activity; F:metal ion binding
B. dothidea	53_S186_L007_g11670.t1			hfid_1686	CYP5080				p450						cytochrome P450 oxidoreductase	F:binding; F:oxidoreductase activity
B. dothidea	53_S186_L007_g11880.t1			hfid_1689	CYP5080				p450;Amidohydro_3						amidohydrolase 3	F:hydrolase activity
B. dothidea	53_S186_L007_g1478.t1			hfid_1689	CYP5080										cytochrome P450	P:regulation of transcription, DNA-templated; C:membrane; F:oxidoreductase activity; F:transition metal ion binding
B. dothidea	53_S186_L007_g1479.t1			hfid_1689	CYP5080				p450						cytochrome P450	F:monooxygenase activity; F:iron ion binding; F:oxidoreductase activity, acting on paired donors, with incorporation or reduction of molecular oxygen; F:heme binding; P:oxidation-reduction process
B. dothidea	53_S186_L007_g1508.t1			hfid_1689	CYP5080				p450						cytochrome P450 oxidoreductase	F:binding; F:oxidoreductase activity
B. dothidea	53_S186_L007_g2110.t1			hfid_1688	CYP5080				p450						pisatin demethylase	F:monooxygenase activity; F:iron ion binding; F:methyltransferase activity; F:oxidoreductase activity, acting on paired donors, with incorporation or reduction of molecular oxygen; F:heme binding; P:methylation; P:oxidation-reduction process
B. dothidea	53_S186_L007_g2281.t1			hfid_1692	CYP5080				p450						putative cytochrome p450 protein	F:monooxygenase activity; F:iron ion binding; C:integral component of membrane; F:oxidoreductase activity, acting on paired donors, with incorporation or reduction of molecular oxygen; F:heme binding; P:oxidation-reduction process
B. dothidea	53_S186_L007_g2860.t1			hfid_1689	CYP5080				p450						pisatin demethylase	F:monooxygenase activity; F:iron ion binding; F:methyltransferase activity; C:integral component of membrane; F:oxidoreductase activity, acting on paired donors, with incorporation or reduction of molecular oxygen; F:heme binding; P:methylation; P:oxidation-reduction process
B. dothidea	53_S186_L007_g3534.t1			hfid_1689	CYP5080				p450						pisatin demethylase	F:monooxygenase activity; F:iron ion binding; F:methyltransferase activity; C:integral component of membrane; F:oxidoreductase activity, acting on paired donors, with incorporation or reduction of molecular oxygen; F:heme binding; P:methylation; P:oxidation-reduction process
B. dothidea	53_S186_L007_g3916.t1			hfid_1691	CYP5080				p450						putative pisatin demethylase protein	F:monooxygenase activity; F:iron ion binding; F:methyltransferase activity; F:oxidoreductase activity, acting on paired donors, with incorporation or reduction of molecular oxygen; F:heme binding; P:methylation; P:oxidation-reduction process
B. dothidea	53_S186_L007_g3937.t1			hfid_1691	CYP5080				p450						putative cytochrome p450 protein	F:iron ion binding; P:regulation of transcription, DNA-templated; C:membrane; F:oxidoreductase activity, acting on paired donors, with incorporation or reduction of molecular oxygen; F:heme binding; P:oxidation-reduction process
B. dothidea	53_S186_L007_g4222.t1			hfid_1689	CYP5080				p450						cytochrome P450 family protein	F:monooxygenase activity; F:iron ion binding; C:integral component of membrane; F:oxidoreductase activity, acting on paired donors, with incorporation or reduction of molecular oxygen; F:heme binding; P:oxidation-reduction process
B. dothidea	53_S186_L007_g4622.t1			hfid_1691	CYP5080				p450	SP(Sec/SPI)					cytochrome P450	F:monooxygenase activity; F:iron ion binding; F:oxidoreductase activity, acting on paired donors, with incorporation or reduction of molecular oxygen; F:heme binding; P:oxidation-reduction process
B. dothidea	53_S186_L007_g5358.t1			hfid_1689	CYP5080				p450						cytochrome p450 pisatin	F:binding; F:oxidoreductase activity
B. dothidea	53_S186_L007_g5962.t1			hfid_1687	CYP5080				p450						cytochrome P450 family protein	F:oxidoreductase activity; F:metal ion binding
B. dothidea	53_S186_L007_g5987.t1			hfid_1688	CYP5080				p450						cytochrome p450 family protein	F:binding; F:oxidoreductase activity
B. dothidea	53_S186_L007_g6144.t1	Phomopsins	NRPS-like|T1PKS	hfid_1687	CYP5080				p450						pisatin demethylase	P:metabolic process; F:oxidoreductase activity; F:metal ion binding
B. dothidea	53_S186_L007_g6820.t1			hfid_1686	CYP5080				p450						cytochrome P450 oxidoreductase	F:monooxygenase activity; F:iron ion binding; C:membrane; F:oxidoreductase activity, acting on paired donors, with incorporation or reduction of molecular oxygen; F:heme binding; P:oxidation-reduction process
B. dothidea	53_S186_L007_g7867.t1	Mycophenolic_acid	T1PKS	hfid_1686	CYP5080				p450						cytochrome P450	C:membrane; F:oxidoreductase activity; F:metal ion binding
B. dothidea	53_S186_L007_g8256.t1			hfid_1687	CYP5080				p450						putative cytochrome p450 protein	F:monooxygenase activity; F:iron ion binding; C:integral component of membrane; F:oxidoreductase activity, acting on paired donors, with incorporation or reduction of molecular oxygen; F:heme binding; P:oxidation-reduction process
B. dothidea	53_S186_L007_g8372.t1			hfid_1689	CYP5080				p450						cytochrome P450 oxidoreductase	F:monooxygenase activity; F:iron ion binding; C:integral component of membrane; F:oxidoreductase activity, acting on paired donors, with incorporation or reduction of molecular oxygen; F:heme binding; P:oxidation-reduction process
B. dothidea	53_S186_L007_g8594.t1		NRPS	hfid_1686	CYP5080				p450						cytochrome p450 family protein	F:monooxygenase activity; F:iron ion binding; F:oxidoreductase activity, acting on paired donors, with incorporation or reduction of molecular oxygen; F:heme binding; P:oxidation-reduction process
B. dothidea	53_S186_L007_g10103.t1			hfid_381	CYP51				Pkinase;POLO_box		9.B.106	The_Pock_Size-determining_Protein_(PSDP)_Family	_Incompletely_Characterized_Transport_Systems	9.B.106.3.1	PLK protein kinase	F:motor activity; F:actin binding; F:protein serine/threonine kinase activity; F:ATP binding; P:protein phosphorylation; C:microtubule cytoskeleton; C:myosin complex; P:regulation of biological process
B. dothidea	53_S186_L007_g10311.t1			hfid_381	CYP51				Pkinase;FHA		8.A.104	The_5'-AMP-activated_protein_kinase_(AMPK)_Family	_Accessory_Factors_Involved_in_Transport	8.A.104.1.2	Pkinase-domain-containing protein	F:3-beta-hydroxy-delta5-steroid dehydrogenase activity; F:protein kinase activity; F:ATP binding; P:protein phosphorylation; P:steroid biosynthetic process; P:oxidation-reduction process
B. dothidea	53_S186_L007_g10356.t1			hfid_381	CYP51				Pkinase		8.A.104	The_5'-AMP-activated_protein_kinase_(AMPK)_Family	_Accessory_Factors_Involved_in_Transport	8.A.104.1.2	calcium/calmodulin-dependent protein kinase type 2	F:protein kinase activity; F:ATP binding; P:protein phosphorylation
B. dothidea	53_S186_L007_g10406.t1			hfid_381	CYP51				Pkinase		1.I.1	The_Eukaryotic_Nuclear_Pore_Complex_(E-NPC)_Family	_Channels/Pores	1.I.1.1.3	kinase-like protein	F:protein kinase activity; F:protein serine/threonine kinase activity; F:ATP binding; P:protein phosphorylation; P:protein transport; F:kinase activity; P:phosphorylation
B. dothidea	53_S186_L007_g10490.t1			hfid_381	CYP51				p450						cytochrome P450, family 51 (sterol 14-demethylase)	C:endoplasmic reticulum; C:plasma membrane; P:ergosterol biosynthetic process; F:drug binding; F:sterol 14-demethylase activity; P:cellular response to drug; F:metal ion binding; P:oxidation-reduction process
B. dothidea	53_S186_L007_g10583.t1		NRPS	hfid_381	CYP51				Pkinase;TPR_10;TPR_12		1.A.87	The_Mechanosensitive_Calcium_Channel_(MCA)_Family	_Channels/Pores	1.A.87.2.1	kinesin light chain 3	F:catalytic activity
B. dothidea	53_S186_L007_g10900.t1			hfid_381	CYP51				Pkinase		1.C.104	The_Heterokaryon_Incompatibility_Prion/Amyloid_Protein_(HET-s)_Family	_Channels/Pores	1.C.104.2.4	serine/threonine protein kinase	F:protein kinase activity; P:phosphorylation
B. dothidea	53_S186_L007_g10911.t1			hfid_381	CYP51				Pkinase		8.A.104	The_5'-AMP-activated_protein_kinase_(AMPK)_Family	_Accessory_Factors_Involved_in_Transport	8.A.104.1.2	predicted protein	P:cellular process; F:kinase activity
B. dothidea	53_S186_L007_g1096.t1			hfid_381	CYP51				Pkinase		1.I.1	The_Eukaryotic_Nuclear_Pore_Complex_(E-NPC)_Family	_Channels/Pores	1.I.1.1.3	serine/threonine-protein kinase	F:ATP binding; P:protein phosphorylation; F:RNA polymerase II CTD heptapeptide repeat kinase activity; C:membrane; C:transcription factor TFIIK complex
B. dothidea	53_S186_L007_g11064.t1			hfid_381	CYP51				Pkinase		1.I.1	The_Eukaryotic_Nuclear_Pore_Complex_(E-NPC)_Family	_Channels/Pores	1.I.1.1.3	cyclin-dependent kinase 10 isoform X1	F:protein serine/threonine kinase activity; F:ATP binding; P:protein phosphorylation
B. dothidea	53_S186_L007_g11135.t1			hfid_381	CYP51				Pkinase		8.A.104	The_5'-AMP-activated_protein_kinase_(AMPK)_Family	_Accessory_Factors_Involved_in_Transport	8.A.104.1.2	serine/threonine-protein kinase ppk14	F:protein serine/threonine kinase activity; F:ATP binding; C:nucleus; C:cytoplasm; C:plasma membrane; P:protein phosphorylation
B. dothidea	53_S186_L007_g11629.t1			hfid_381	CYP51				Pkinase;SAM_2;Ras_bdg_2		8.A.104	The_5'-AMP-activated_protein_kinase_(AMPK)_Family	_Accessory_Factors_Involved_in_Transport	8.A.104.1.2	Pkinase-domain-containing protein	F:protein kinase activity; F:ATP binding; P:protein phosphorylation; P:signal transduction
B. dothidea	53_S186_L007_g11650.t1			hfid_381	CYP51				Pkinase;Response_reg		9.B.106	The_Pock_Size-determining_Protein_(PSDP)_Family	_Incompletely_Characterized_Transport_Systems	9.B.106.3.1	AGC protein kinase	P:phosphorelay signal transduction system; F:protein serine/threonine kinase activity; F:ATP binding; C:nucleus; C:cytoplasm; P:regulation of transcription, DNA-templated; P:peptidyl-serine phosphorylation
B. dothidea	53_S186_L007_g12165.t1			hfid_381	CYP51				Pkinase		9.B.106	The_Pock_Size-determining_Protein_(PSDP)_Family	_Incompletely_Characterized_Transport_Systems	9.B.106.3.1	serine/threonine protein kinase	F:protein kinase activity; F:protein serine/threonine kinase activity; F:ATP binding; P:protein phosphorylation; F:kinase activity; P:phosphorylation
B. dothidea	53_S186_L007_g1240.t1			hfid_381	CYP51				Pkinase;PQQ;Ribonuc_2-5A	SP(Sec/SPI)	9.A.15	The_Autophagy-related_Phagophore-formation_Transporter_(APT)_Family	_Incompletely_Characterized_Transport_Systems	9.A.15.3.1	IRE protein kinase	F:ribonuclease activity; F:protein kinase activity; F:ATP binding; P:mRNA processing; P:protein phosphorylation; P:signal transduction; P:response to endoplasmic reticulum stress; P:RNA phosphodiester bond hydrolysis
B. dothidea	53_S186_L007_g1337.t1			hfid_381	CYP51				Pkinase		1.I.1	The_Eukaryotic_Nuclear_Pore_Complex_(E-NPC)_Family	_Channels/Pores	1.I.1.1.3	STE/STE20/YSK protein kinase	F:protein serine/threonine kinase activity; F:ATP binding; P:protein phosphorylation
B. dothidea	53_S186_L007_g1577.t1			hfid_381	CYP51				Pkinase		1.I.1	The_Eukaryotic_Nuclear_Pore_Complex_(E-NPC)_Family	_Channels/Pores	1.I.1.1.3	kinase-like protein	F:binding
B. dothidea	53_S186_L007_g1682.t1			hfid_381	CYP51				Pkinase		9.A.15	The_Autophagy-related_Phagophore-formation_Transporter_(APT)_Family	_Incompletely_Characterized_Transport_Systems	9.A.15.3.1	serine/threonine-protein kinase prp4	F:protein serine/threonine kinase activity; F:ATP binding; C:nucleus; P:protein phosphorylation
B. dothidea	53_S186_L007_g1695.t1			hfid_381	CYP51				Pkinase		9.B.106	The_Pock_Size-determining_Protein_(PSDP)_Family	_Incompletely_Characterized_Transport_Systems	9.B.106.3.1	RAN protein kinase	F:protein serine/threonine kinase activity; F:ATP binding; C:nucleus; C:cytoplasm; P:protein phosphorylation; P:intracellular signal transduction
B. dothidea	53_S186_L007_g1797.t1			hfid_381	CYP51				Pkinase		9.B.106	The_Pock_Size-determining_Protein_(PSDP)_Family	_Incompletely_Characterized_Transport_Systems	9.B.106.3.1	serine/threonine-protein kinase psk1	F:ribosomal protein S6 kinase activity; F:ATP binding; C:cytoplasm; P:peptidyl-serine phosphorylation; P:TORC1 signaling; P:protein autophosphorylation
B. dothidea	53_S186_L007_g1817.t1			hfid_381	CYP51				Pkinase;C2;Pkinase_C		9.B.106	The_Pock_Size-determining_Protein_(PSDP)_Family	_Incompletely_Characterized_Transport_Systems	9.B.106.3.1	Pkinase-domain-containing protein	F:protein serine/threonine kinase activity; F:ATP binding; P:peptidyl-serine phosphorylation; P:intracellular signal transduction
B. dothidea	53_S186_L007_g1828.t1			hfid_381	CYP51				Pkinase		1.I.1	The_Eukaryotic_Nuclear_Pore_Complex_(E-NPC)_Family	_Channels/Pores	1.I.1.1.3	kinase-like protein	F:protein kinase activity; F:ATP binding; P:protein phosphorylation
B. dothidea	53_S186_L007_g1831.t1			hfid_375	CYP51				LRR_4;LRR_8		1.A.87	The_Mechanosensitive_Calcium_Channel_(MCA)_Family	_Channels/Pores	1.A.87.2.4	L domain-like protein	F:molecular_function; C:cellular_component; P:biological_process
B. dothidea	53_S186_L007_g1869.t1			hfid_381	CYP51				Pkinase;KA1		8.A.104	The_5'-AMP-activated_protein_kinase_(AMPK)_Family	_Accessory_Factors_Involved_in_Transport	8.A.104.1.1	protein kinase kin1	P:microtubule cytoskeleton organization; F:protein serine/threonine kinase activity; F:ATP binding; C:nucleus; C:cytoplasm; P:protein phosphorylation; P:plasma membrane organization; P:establishment or maintenance of actin cytoskeleton polarity; C:medial membrane band; P:intracellular signal transduction; C:non-growing cell tip; C:new growing cell tip; C:old cell tip after activation of bipolar c…
B. dothidea	53_S186_L007_g1897.t1			hfid_381	CYP51				Pkinase;C1_1;Pkinase_C;HR1		8.A.104	The_5'-AMP-activated_protein_kinase_(AMPK)_Family	_Accessory_Factors_Involved_in_Transport	8.A.104.1.3	protein kinase C	F:protein kinase C activity; F:ATP binding; P:protein phosphorylation; P:fungal-type cell wall biogenesis; P:intracellular signal transduction; F:metal ion binding
B. dothidea	53_S186_L007_g2030.t1			hfid_381	CYP51				Pkinase		8.A.104	The_5'-AMP-activated_protein_kinase_(AMPK)_Family	_Accessory_Factors_Involved_in_Transport	8.A.104.1.1	kinase-like protein	F:protein kinase activity; F:ATP binding; P:protein phosphorylation
B. dothidea	53_S186_L007_g2186.t1			hfid_380	CYP51				Arv1		9.A.19	The_Lipid_Intermediate_Transporter_(Arv1)_Family	_Incompletely_Characterized_Transport_Systems	9.A.19.1.2	arv1 protein	C:integral component of membrane
B. dothidea	53_S186_L007_g2252.t1			hfid_381	CYP51				Pkinase		8.A.104	The_5'-AMP-activated_protein_kinase_(AMPK)_Family	_Accessory_Factors_Involved_in_Transport	8.A.104.1.2	Pkinase-domain-containing protein	C:fungal-type vacuole; P:carbon catabolite repression of transcription from RNA polymerase II promoter by glucose; F:cAMP-dependent protein kinase activity; F:ATP binding; C:nucleus; C:cAMP-dependent protein kinase complex; P:protein phosphorylation; P:negative regulation of induction of conjugation with cellular fusion; C:membrane; P:cAMP-mediated signaling; P:negative regulation of gluconeogene…
B. dothidea	53_S186_L007_g2495.t1			hfid_381	CYP51				Pkinase		1.I.1	The_Eukaryotic_Nuclear_Pore_Complex_(E-NPC)_Family	_Channels/Pores	1.I.1.1.3	serine/threonine kinase 16	F:protein serine/threonine kinase activity; F:ATP binding; C:vacuole; P:protein phosphorylation; P:vacuolar protein processing; P:regulation of vacuole fusion, non-autophagic
B. dothidea	53_S186_L007_g2590.t1			hfid_381	CYP51				Pkinase		1.I.1	The_Eukaryotic_Nuclear_Pore_Complex_(E-NPC)_Family	_Channels/Pores	1.I.1.1.3	kinase-like protein	F:transferase activity
B. dothidea	53_S186_L007_g2680.t1			hfid_381	CYP51				Pkinase		1.I.1	The_Eukaryotic_Nuclear_Pore_Complex_(E-NPC)_Family	_Channels/Pores	1.I.1.1.3	casein kinase II subunit alpha	F:protein serine/threonine kinase activity; F:ATP binding; P:protein phosphorylation; C:integral component of membrane
B. dothidea	53_S186_L007_g271.t1			hfid_375	CYP51				SOG2;LRR_8		1.A.25	The_Gap_Junction-forming_Innexin_(Innexin)_Family	_Channels/Pores	1.A.25.3.1	RAM signalling pathway protein domain-containing protein	F:adenylate cyclase activity; F:lyase activity
B. dothidea	53_S186_L007_g2742.t1			hfid_381	CYP51				Pkinase		1.I.1	The_Eukaryotic_Nuclear_Pore_Complex_(E-NPC)_Family	_Channels/Pores	1.I.1.1.3	kinase-like protein	F:protein serine/threonine/tyrosine kinase activity; F:ATP binding; P:protein phosphorylation; P:mitotic cell cycle checkpoint; P:chromosome separation
B. dothidea	53_S186_L007_g2802.t1			hfid_381	CYP51				Pkinase		8.A.104	The_5'-AMP-activated_protein_kinase_(AMPK)_Family	_Accessory_Factors_Involved_in_Transport	8.A.104.1.3	Pkinase-domain-containing protein	F:protein serine/threonine kinase activity; F:ATP binding; C:nucleus; C:cytosol; P:protein phosphorylation; P:intracellular signal transduction; P:negative regulation of glycogen biosynthetic process
B. dothidea	53_S186_L007_g2857.t1			hfid_381	CYP51				Pkinase		9.A.15	The_Autophagy-related_Phagophore-formation_Transporter_(APT)_Family	_Incompletely_Characterized_Transport_Systems	9.A.15.1.1	serine/threonine protein kinase	P:actin cortical patch assembly; F:protein serine/threonine kinase activity; F:ATP binding; C:nucleus; P:protein phosphorylation; P:actin filament organization
B. dothidea	53_S186_L007_g3023.t1			hfid_381	CYP51				Pkinase						kinase-like protein	P:G1/S transition of mitotic cell cycle; P:double-strand break repair via break-induced replication; F:protein serine/threonine kinase activity; F:ATP binding; C:nucleus; C:cytoplasm; P:negative regulation of transcription by transcription factor catabolism; P:peptidyl-serine phosphorylation; P:peptidyl-threonine phosphorylation; C:Dbf4-dependent protein kinase complex; P:mitotic DNA replication …
B. dothidea	53_S186_L007_g3166.t1			hfid_381	CYP51				Pkinase		1.I.1	The_Eukaryotic_Nuclear_Pore_Complex_(E-NPC)_Family	_Channels/Pores	1.I.1.1.3	WEE/WEE-UNCLASSIFIED protein kinase	F:protein kinase activity; F:ATP binding; P:protein phosphorylation
B. dothidea	53_S186_L007_g3213.t1			hfid_375	CYP51				Guanylate_cyc;PP2C;RA;Ad_cyc_g-alpha;LRR_8		8.A.43	The_NEAT-domain_containing_methaemoglobin_heme_sequestration_(N-MHS)_Family	_Accessory_Factors_Involved_in_Transport	8.A.43.1.12	PP2C-domain-containing protein	F:magnesium ion binding; F:adenylate cyclase activity; P:cAMP biosynthetic process; P:intracellular signal transduction
B. dothidea	53_S186_L007_g3218.t1			hfid_381	CYP51				Pkinase		9.B.106	The_Pock_Size-determining_Protein_(PSDP)_Family	_Incompletely_Characterized_Transport_Systems	9.B.106.3.1	serine/threonine-protein kinase cbk1	F:kinase activity; P:phosphorylation
B. dothidea	53_S186_L007_g3253.t1			hfid_381	CYP51				Pkinase		1.I.1	The_Eukaryotic_Nuclear_Pore_Complex_(E-NPC)_Family	_Channels/Pores	1.I.1.1.3	cell division protein kinase (Ctk1), putative	F:protein kinase activity; C:cytosol; P:phosphorylation
B. dothidea	53_S186_L007_g3283.t1			hfid_375	CYP51				Exo_endo_phos;LRR_8		1.A.25	The_Gap_Junction-forming_Innexin_(Innexin)_Family	_Channels/Pores	1.A.25.3.1	glucose-repressible alcohol dehydrogenase transcriptional effector	P:nuclear-transcribed mRNA poly(A) tail shortening; C:P-body; F:poly(A)-specific ribonuclease activity; F:binding; C:CCR4-NOT core complex; P:RNA phosphodiester bond hydrolysis, exonucleolytic
B. dothidea	53_S186_L007_g3360.t1			hfid_381	CYP51				Pkinase						protein kinase domain-containing protein	F:kinase activity
B. dothidea	53_S186_L007_g3448.t1			hfid_381	CYP51				Pkinase;UBA_2;AdenylateSensor		8.A.104	The_5'-AMP-activated_protein_kinase_(AMPK)_Family	_Accessory_Factors_Involved_in_Transport	8.A.104.1.1	serine threonine protein kinase SNF1p	P:establishment of mitotic spindle orientation; C:cellular bud neck septin ring; C:fungal-type vacuole; P:replicative cell aging; P:invasive growth in response to glucose limitation; F:AMP-activated protein kinase activity; F:ARF guanyl-nucleotide exchange factor activity; F:ATP binding; C:nuclear envelope lumen; P:protein phosphorylation; P:response to unfolded protein; P:cellular response to ni…
B. dothidea	53_S186_L007_g3806.t1			hfid_381	CYP51				Pkinase		1.C.104	The_Heterokaryon_Incompatibility_Prion/Amyloid_Protein_(HET-s)_Family	_Channels/Pores	1.C.104.2.4	Pkinase-domain-containing protein	P:cellular process; F:kinase activity; P:regulation of biological process
B. dothidea	53_S186_L007_g3849.t1			hfid_381	CYP51				Pkinase		8.A.104	The_5'-AMP-activated_protein_kinase_(AMPK)_Family	_Accessory_Factors_Involved_in_Transport	8.A.104.1.2	STE/STE11/BCK1 protein kinase	F:kinase activity; P:phosphorylation; P:regulation of cellular process
B. dothidea	53_S186_L007_g4164.t1			hfid_381	CYP51				Pkinase		9.B.106	The_Pock_Size-determining_Protein_(PSDP)_Family	_Incompletely_Characterized_Transport_Systems	9.B.106.3.3	MAP kinase	P:activation of MAPK activity; F:protein serine/threonine kinase activity; F:MAP kinase kinase activity; F:ATP binding; C:cytoplasm; P:stress-activated protein kinase signaling cascade
B. dothidea	53_S186_L007_g4174.t1			hfid_381	CYP51				Pkinase		9.A.15	The_Autophagy-related_Phagophore-formation_Transporter_(APT)_Family	_Incompletely_Characterized_Transport_Systems	9.A.15.3.1	MAP kinase	P:activation of MAPKK activity; F:MAP kinase kinase kinase activity; F:ATP binding; C:cytoplasm; P:cellular response to oxidative stress; P:cellular response to heat; P:stress-activated MAPK cascade; P:cellular response to osmotic stress; C:Mcs4 RR-MAPKKK complex
B. dothidea	53_S186_L007_g4230.t1			hfid_381	CYP51				Pkinase		9.B.106	The_Pock_Size-determining_Protein_(PSDP)_Family	_Incompletely_Characterized_Transport_Systems	9.B.106.3.3	PEK protein kinase	F:protein kinase activity; P:phosphorylation; P:cellular protein metabolic process; F:organic cyclic compound binding; F:heterocyclic compound binding
B. dothidea	53_S186_L007_g4332.t1			hfid_375	CYP51				LRR_4;LRR_8		8.A.43	The_NEAT-domain_containing_methaemoglobin_heme_sequestration_(N-MHS)_Family	_Accessory_Factors_Involved_in_Transport	8.A.43.1.12	putative conserved leucine-rich repeat protein	F:molecular_function; C:cellular_component; P:biological_process
B. dothidea	53_S186_L007_g4406.t1			hfid_381	CYP51				Pkinase;PBD		8.A.104	The_5'-AMP-activated_protein_kinase_(AMPK)_Family	_Accessory_Factors_Involved_in_Transport	8.A.104.1.2	Pkinase-domain-containing protein	F:protein serine/threonine kinase activity; F:ATP binding; C:cytoplasm; P:cell migration; P:stress-activated protein kinase signaling cascade; P:activation of protein kinase activity; P:regulation of MAPK cascade; F:Rac GTPase binding
B. dothidea	53_S186_L007_g442.t1			hfid_381	CYP51				Pkinase		9.A.15	The_Autophagy-related_Phagophore-formation_Transporter_(APT)_Family	_Incompletely_Characterized_Transport_Systems	9.A.15.3.1	Pkinase-domain-containing protein	F:protein kinase activity; P:signal transduction by protein phosphorylation; P:intracellular signal transduction
B. dothidea	53_S186_L007_g4436.t1			hfid_381	CYP51				Pkinase		1.I.1	The_Eukaryotic_Nuclear_Pore_Complex_(E-NPC)_Family	_Channels/Pores	1.I.1.1.3	glycoside hydrolase family 18 protein	P:G1/S transition of mitotic cell cycle; C:cyclin-dependent protein kinase holoenzyme complex; F:cyclin-dependent protein serine/threonine kinase activity; F:ATP binding; C:nucleus; C:cytoplasm; C:spindle pole body; P:carbohydrate metabolic process; P:protein phosphorylation; P:positive regulation of cell population proliferation; P:regulation of G2/M transition of mitotic cell cycle; F:hydrolase…
B. dothidea	53_S186_L007_g4504.t1			hfid_381	CYP51				Pkinase		1.I.1	The_Eukaryotic_Nuclear_Pore_Complex_(E-NPC)_Family	_Channels/Pores	1.I.1.1.3	kinase-like protein	F:protein kinase activity; F:ATP binding; P:protein phosphorylation; C:integral component of membrane
B. dothidea	53_S186_L007_g4788.t1			hfid_381	CYP51				Pkinase		1.I.1	The_Eukaryotic_Nuclear_Pore_Complex_(E-NPC)_Family	_Channels/Pores	1.I.1.1.3	serine/threonine protein kinase	F:protein kinase activity; P:phosphorylation
B. dothidea	53_S186_L007_g4904.t1			hfid_381	CYP51				Pkinase		1.I.1	The_Eukaryotic_Nuclear_Pore_Complex_(E-NPC)_Family	_Channels/Pores	1.I.1.1.3	serine/threonine protein kinase, CMGC family, CDC2/CDK subfamily	F:protein kinase activity; F:ATP binding; P:protein phosphorylation
B. dothidea	53_S186_L007_g4999.t1			hfid_381	CYP51				Pkinase		1.I.1	The_Eukaryotic_Nuclear_Pore_Complex_(E-NPC)_Family	_Channels/Pores	1.I.1.1.3	serine/threonine-protein kinase MAK	F:protein kinase activity; F:ATP binding; P:protein phosphorylation
B. dothidea	53_S186_L007_g500.t1			hfid_381	CYP51				Pkinase		1.I.1	The_Eukaryotic_Nuclear_Pore_Complex_(E-NPC)_Family	_Channels/Pores	1.I.1.1.3	Pkinase-domain-containing protein	C:nuclear chromatin; F:cyclin-dependent protein serine/threonine kinase activity; F:ATP binding; C:cyclin/CDK positive transcription elongation factor complex; F:transcription factor binding; F:RNA polymerase II CTD heptapeptide repeat kinase activity; F:cyclin binding; P:positive regulation of transcription elongation from RNA polymerase II promoter; F:transcription regulatory region DNA binding…
B. dothidea	53_S186_L007_g5005.t1			hfid_381	CYP51				Pkinase		1.I.1	The_Eukaryotic_Nuclear_Pore_Complex_(E-NPC)_Family	_Channels/Pores	1.I.1.1.3	serine/threonine-protein kinase cot-1	F:protein serine/threonine kinase activity; F:ATP binding; P:protein phosphorylation
B. dothidea	53_S186_L007_g5167.t1			hfid_381	CYP51				Pkinase		9.B.106	The_Pock_Size-determining_Protein_(PSDP)_Family	_Incompletely_Characterized_Transport_Systems	9.B.106.3.1	kinase-like protein	F:protein serine/threonine kinase activity; F:ATP binding; C:spindle pole body; P:peptidyl-serine phosphorylation; P:intracellular signal transduction
B. dothidea	53_S186_L007_g5191.t1			hfid_381	CYP51				Pkinase;Fungal_KA1		8.A.104	The_5'-AMP-activated_protein_kinase_(AMPK)_Family	_Accessory_Factors_Involved_in_Transport	8.A.104.1.2	Pkinase-domain-containing protein	F:protein kinase activity; F:ATP binding; P:protein phosphorylation
B. dothidea	53_S186_L007_g5228.t1			hfid_381	CYP51				Pkinase		1.I.1	The_Eukaryotic_Nuclear_Pore_Complex_(E-NPC)_Family	_Channels/Pores	1.I.1.1.3	serine/threonine-protein kinase bur1	C:nuclear chromatin; F:cyclin-dependent protein serine/threonine kinase activity; F:ATP binding; F:transcription factor binding; F:RNA polymerase II CTD heptapeptide repeat kinase activity; F:cyclin binding; F:transcription regulatory region DNA binding; P:regulation of cell cycle; C:P-TEFb complex; C:P-TEFb-cap methyltransferase complex; P:phosphorylation of RNA polymerase II C-terminal domain s…
B. dothidea	53_S186_L007_g5715.t1			hfid_381	CYP51				Pkinase		9.B.106	The_Pock_Size-determining_Protein_(PSDP)_Family	_Incompletely_Characterized_Transport_Systems	9.B.106.3.1	AUR protein kinase	F:RNA binding; F:glutamate 5-kinase activity; F:protein serine/threonine kinase activity; F:ATP binding; C:cytoplasm; P:protein phosphorylation; P:proline biosynthetic process
B. dothidea	53_S186_L007_g5722.t1			hfid_381	CYP51				Pkinase;Pkinase_C		9.B.106	The_Pock_Size-determining_Protein_(PSDP)_Family	_Incompletely_Characterized_Transport_Systems	9.B.106.3.1	AGC/AKT protein kinase	F:protein serine/threonine kinase activity; F:ATP binding; P:peptidyl-serine phosphorylation; P:intracellular signal transduction
B. dothidea	53_S186_L007_g5802.t1			hfid_381	CYP51				Pkinase		8.A.104	The_5'-AMP-activated_protein_kinase_(AMPK)_Family	_Accessory_Factors_Involved_in_Transport	8.A.104.1.2	CAMK/CAMK1 protein kinase	F:protein serine/threonine kinase activity; F:ATP binding; P:protein phosphorylation
B. dothidea	53_S186_L007_g6225.t1			hfid_381	CYP51				Pkinase		1.I.1	The_Eukaryotic_Nuclear_Pore_Complex_(E-NPC)_Family	_Channels/Pores	1.I.1.1.3	serine/threonine protein kinase	F:nucleotide binding; F:protein kinase activity; F:protein serine/threonine kinase activity; F:ATP binding; P:protein phosphorylation; P:apoptotic process; F:kinase activity; P:phosphorylation
B. dothidea	53_S186_L007_g6258.t1			hfid_381	CYP51				Pkinase		8.A.104	The_5'-AMP-activated_protein_kinase_(AMPK)_Family	_Accessory_Factors_Involved_in_Transport	8.A.104.1.3	kinase-like protein	F:protein serine/threonine kinase activity; F:ATP binding; P:peptidyl-serine phosphorylation; P:intracellular signal transduction
B. dothidea	53_S186_L007_g6352.t1			hfid_381	CYP51				Pkinase;WD40		8.A.104	The_5'-AMP-activated_protein_kinase_(AMPK)_Family	_Accessory_Factors_Involved_in_Transport	8.A.104.1.3	VPS15 protein kinase	F:protein serine/threonine kinase activity; C:late endosome; P:protein phosphorylation; P:protein targeting to vacuole; P:macroautophagy; P:autophagy of peroxisome; C:phosphatidylinositol 3-kinase complex, class III, type I; C:phosphatidylinositol 3-kinase complex, class III, type II; P:late endosome to vacuole transport; C:nucleus-vacuole junction
B. dothidea	53_S186_L007_g64.t1			hfid_381	CYP51				Pkinase		8.A.104	The_5'-AMP-activated_protein_kinase_(AMPK)_Family	_Accessory_Factors_Involved_in_Transport	8.A.104.1.3	kinase-like protein	F:protein serine/threonine kinase activity; F:ATP binding; C:nucleus; C:cell cortex; P:protein phosphorylation; P:intracellular signal transduction
B. dothidea	53_S186_L007_g6418.t1			hfid_381	CYP51				Pkinase		1.I.1	The_Eukaryotic_Nuclear_Pore_Complex_(E-NPC)_Family	_Channels/Pores	1.I.1.1.3	CMGC/CDK/CDK5 protein kinase	F:cyclin-dependent protein serine/threonine kinase activity; F:ATP binding; C:nucleus; C:cytoplasm; P:protein phosphorylation; P:regulation of cell cycle
B. dothidea	53_S186_L007_g6506.t1			hfid_381	CYP51				p450						14-alpha sterol demethylase Cyp51B	F:protein kinase activity; F:iron ion binding; F:ATP binding; C:endoplasmic reticulum; C:plasma membrane; P:protein phosphorylation; P:ergosterol biosynthetic process; F:methyltransferase activity; F:sterol 14-demethylase activity; C:integral component of membrane; F:heme binding; P:methylation; P:cellular response to drug; P:oxidation-reduction process; P:demethylation
B. dothidea	53_S186_L007_g6507.t1			hfid_381	CYP51				Pkinase;FHA		8.A.104	The_5'-AMP-activated_protein_kinase_(AMPK)_Family	_Accessory_Factors_Involved_in_Transport	8.A.104.1.2	Pkinase-domain-containing protein	F:protein kinase activity; F:ATP binding; P:protein phosphorylation; C:membrane; F:oxidoreductase activity; F:metal ion binding
B. dothidea	53_S186_L007_g6514.t1			hfid_381	CYP51				Pkinase;Cytochrom_C1		3.D.3	The_Proton-translocating_Quinol:Cytochrome_c_Reductase_(QCR)_Superfamily	_Primary_Active_Transporters	3.D.3.3.1	kinase-like protein	F:protein serine/threonine kinase activity; F:ATP binding; P:protein phosphorylation
B. dothidea	53_S186_L007_g6532.t1			hfid_375	CYP51				LRR_8						Leucine Rich Repeat domain protein
B. dothidea	53_S186_L007_g6566.t1		NRPS-like	hfid_381	CYP51				Pkinase;DUF3543		9.A.15	The_Autophagy-related_Phagophore-formation_Transporter_(APT)_Family	_Incompletely_Characterized_Transport_Systems	9.A.15.1.1	ULK/ULK protein kinase	F:protein kinase activity; P:phosphorylation
B. dothidea	53_S186_L007_g6898.t1			hfid_381	CYP51				Pkinase		1.I.1	The_Eukaryotic_Nuclear_Pore_Complex_(E-NPC)_Family	_Channels/Pores	1.I.1.1.3	STE/STE11/CDC15 protein kinase	F:protein serine/threonine kinase activity; F:ATP binding; C:cytoplasm; P:signal transduction by protein phosphorylation; P:septation initiation signaling; P:stress-activated protein kinase signaling cascade; P:activation of protein kinase activity; C:new mitotic spindle pole body; P:positive regulation of mitotic division septum assembly; P:regulation of protein localization to mitotic spindle p…
B. dothidea	53_S186_L007_g7031.t1			hfid_381	CYP51				Pkinase		1.I.1	The_Eukaryotic_Nuclear_Pore_Complex_(E-NPC)_Family	_Channels/Pores	1.I.1.1.3	mitogen-activated protein kinase	P:MAPK cascade; F:MAP kinase activity; F:ATP binding
B. dothidea	53_S186_L007_g7384.t1			hfid_381	CYP51				Pkinase		1.I.1	The_Eukaryotic_Nuclear_Pore_Complex_(E-NPC)_Family	_Channels/Pores	1.I.1.1.3	CMGC/MAPK/ERK1 protein kinase	P:MAPK cascade; F:RNA binding; F:helicase activity; F:MAP kinase activity; F:ATP binding; C:nucleus; C:cytoplasm; C:integral component of membrane; P:positive regulation of calcium-mediated signaling; P:positive regulation of cell wall organization or biogenesis; P:positive regulation of calcium ion import across plasma membrane
B. dothidea	53_S186_L007_g7408.t1			hfid_381	CYP51				Pkinase		1.I.1	The_Eukaryotic_Nuclear_Pore_Complex_(E-NPC)_Family	_Channels/Pores	1.I.1.1.3	cyclin-dependent protein kinase-like protein Ssn3	F:cyclin-dependent protein serine/threonine kinase activity; F:ATP binding; P:protein phosphorylation; F:RNA polymerase II CTD heptapeptide repeat kinase activity; C:mediator complex; F:metal ion binding; P:regulation of cell cycle
B. dothidea	53_S186_L007_g7414.t1			hfid_381	CYP51				Pkinase		1.I.1	The_Eukaryotic_Nuclear_Pore_Complex_(E-NPC)_Family	_Channels/Pores	1.I.1.1.3	CMGC/DYRK/DYRK2 protein kinase	F:protein kinase activity; F:ATP binding; P:protein phosphorylation
B. dothidea	53_S186_L007_g7475.t1			hfid_381	CYP51				Pkinase		9.B.106	The_Pock_Size-determining_Protein_(PSDP)_Family	_Incompletely_Characterized_Transport_Systems	9.B.106.3.1	Serine/threonine protein kinase	F:protein kinase activity; F:ATP binding; P:protein phosphorylation; C:intracellular part
B. dothidea	53_S186_L007_g7522.t1			hfid_381	CYP51				Pkinase		9.A.15	The_Autophagy-related_Phagophore-formation_Transporter_(APT)_Family	_Incompletely_Characterized_Transport_Systems	9.A.15.3.1	casein kinase I isoform gamma-3	F:protein serine/threonine kinase activity; F:ATP binding; C:nucleus; C:cytoplasm; C:plasma membrane; P:endocytosis; P:peptidyl-serine phosphorylation; P:peptidyl-threonine phosphorylation
B. dothidea	53_S186_L007_g7527.t1			hfid_381	CYP51				Pkinase		9.B.106	The_Pock_Size-determining_Protein_(PSDP)_Family	_Incompletely_Characterized_Transport_Systems	9.B.106.3.1	serine/threonine-protein kinase Chk1	C:nuclear chromatin; F:protein serine/threonine kinase activity; F:ATP binding; C:cytoplasm; P:protein phosphorylation; P:mitotic DNA replication checkpoint; C:site of double-strand break; P:replication fork protection; P:meiotic recombination checkpoint; P:signal transduction involved in mitotic G2 DNA damage checkpoint; P:negative regulation of transcription from RNA polymerase II promoter by t…
B. dothidea	53_S186_L007_g7627.t1			hfid_381	CYP51				Pkinase;RWD;HGTP_anticodon2;tRNA-synt_His		1.I.1	The_Eukaryotic_Nuclear_Pore_Complex_(E-NPC)_Family	_Channels/Pores	1.I.1.1.3	protein kinase (Gcn2)	F:protein binding; C:ribosome; P:regulation of translational initiation; P:protein phosphorylation; P:cellular response to starvation; F:kinase activity; P:positive regulation of cellular process; P:negative regulation of cellular process; P:regulation of response to stimulus; F:organic cyclic compound binding; F:heterocyclic compound binding; P:cellular response to oxygen-containing compound
B. dothidea	53_S186_L007_g7760.t1			hfid_381	CYP51				Pkinase		1.I.1	The_Eukaryotic_Nuclear_Pore_Complex_(E-NPC)_Family	_Channels/Pores	1.I.1.1.3	mitogen-activated protein kinase HOG1	F:MAP kinase activity; F:ATP binding; C:nucleus; C:cytoplasm; P:stress-activated MAPK cascade
B. dothidea	53_S186_L007_g7962.t1			hfid_381	CYP51				Pkinase		1.I.1	The_Eukaryotic_Nuclear_Pore_Complex_(E-NPC)_Family	_Channels/Pores	1.I.1.1.3	kinase-like protein	F:protein kinase activity; F:ATP binding; P:protein phosphorylation
B. dothidea	53_S186_L007_g8314.t1			hfid_381	CYP51				Pkinase;PH;PBD		1.I.1	The_Eukaryotic_Nuclear_Pore_Complex_(E-NPC)_Family	_Channels/Pores	1.I.1.1.3	Pkinase-domain-containing protein	F:protein serine/threonine kinase activity; F:ATP binding; P:protein phosphorylation
B. dothidea	53_S186_L007_g8351.t1			hfid_381	CYP51				Pkinase		8.A.104	The_5'-AMP-activated_protein_kinase_(AMPK)_Family	_Accessory_Factors_Involved_in_Transport	8.A.104.1.2	CAMKK/CAMKK-META protein kinase	F:protein kinase activity; F:ATP binding; P:protein phosphorylation
B. dothidea	53_S186_L007_g8352.t1			hfid_381	CYP51				Pkinase		1.C.104	The_Heterokaryon_Incompatibility_Prion/Amyloid_Protein_(HET-s)_Family	_Channels/Pores	1.C.104.2.4	Pkinase-domain-containing protein	F:protein serine/threonine kinase activity; F:ATP binding; C:nucleus; C:cytoplasm; P:protein phosphorylation; P:cellular potassium ion homeostasis; P:intracellular signal transduction
B. dothidea	53_S186_L007_g8354.t1			hfid_381	CYP51				Pkinase		1.I.1	The_Eukaryotic_Nuclear_Pore_Complex_(E-NPC)_Family	_Channels/Pores	1.I.1.1.3	glycogen synthase kinase-3 beta	F:protein serine/threonine kinase activity; F:protein serine/threonine/tyrosine kinase activity; F:protein tyrosine kinase activity; F:ATP binding; P:peptidyl-tyrosine phosphorylation; P:regulation of mitotic sister chromatid segregation; P:positive regulation of chromosome segregation; P:positive regulation of protein localization to kinetochore
B. dothidea	53_S186_L007_g856.t1			hfid_381	CYP51				Pkinase		8.A.104	The_5'-AMP-activated_protein_kinase_(AMPK)_Family	_Accessory_Factors_Involved_in_Transport	8.A.104.1.2	Pkinase-domain-containing protein	F:protein kinase activity; F:ATP binding; C:cytoplasm; P:protein phosphorylation
B. dothidea	53_S186_L007_g8560.t1		NRPS-like	hfid_381	CYP51				Pkinase		1.C.104	The_Heterokaryon_Incompatibility_Prion/Amyloid_Protein_(HET-s)_Family	_Channels/Pores	1.C.104.2.4	HAL protein kinase	F:protein serine/threonine kinase activity; F:ATP binding; C:nucleus; C:cytoplasm; P:protein phosphorylation; P:cellular cation homeostasis; P:intracellular signal transduction
B. dothidea	53_S186_L007_g8573.t1			hfid_381	CYP51				Pkinase;ATP-synt_C	SP(Sec/SPI)	9.B.106	The_Pock_Size-determining_Protein_(PSDP)_Family	_Incompletely_Characterized_Transport_Systems	9.B.106.3.1	Pkinase-domain-containing protein	F:protein serine/threonine kinase activity; F:ATP binding; P:protein phosphorylation
B. dothidea	53_S186_L007_g8679.t1			hfid_381	CYP51				p450						14-alpha sterol demethylase Cyp51A	F:monooxygenase activity; F:iron ion binding; F:methyltransferase activity; C:integral component of membrane; F:oxidoreductase activity, acting on paired donors, with incorporation or reduction of molecular oxygen; F:heme binding; P:methylation; P:oxidation-reduction process
B. dothidea	53_S186_L007_g8816.t1			hfid_381	CYP51				Pkinase		9.A.15	The_Autophagy-related_Phagophore-formation_Transporter_(APT)_Family	_Incompletely_Characterized_Transport_Systems	9.A.15.3.1	CK1/CK1/CK1-D protein kinase	F:protein serine/threonine kinase activity; F:ATP binding; C:nucleus; C:cytoplasm; P:translation; P:endocytosis; F:methyltransferase activity; P:peptidyl-serine phosphorylation; P:peptidyl-threonine phosphorylation; P:methylation
B. dothidea	53_S186_L007_g887.t1			hfid_375	CYP51				LRR_8						Leucine Rich Repeat domain protein	C:cytoplasm; F:protein kinase binding
B. dothidea	53_S186_L007_g9075.t1			hfid_381	CYP51				Pkinase		1.I.1	The_Eukaryotic_Nuclear_Pore_Complex_(E-NPC)_Family	_Channels/Pores	1.I.1.1.3	serine protein kinase	F:transferase activity
B. dothidea	53_S186_L007_g9223.t1			hfid_381	CYP51				Pkinase		1.I.1	The_Eukaryotic_Nuclear_Pore_Complex_(E-NPC)_Family	_Channels/Pores	1.I.1.1.3	kinase-like protein	F:protein serine/threonine kinase activity; F:protein tyrosine kinase activity; F:ATP binding; C:nucleus; C:cytoplasm; P:negative regulation of transcription by RNA polymerase III; P:peptidyl-serine phosphorylation; P:peptidyl-tyrosine phosphorylation; P:protein autophosphorylation
B. dothidea	53_S186_L007_g9234.t1		NRPS-like	hfid_382	CYP51										cytochrome P450	F:binding
B. dothidea	53_S186_L007_g93.t1			hfid_381	CYP51				Pkinase		8.A.104	The_5'-AMP-activated_protein_kinase_(AMPK)_Family	_Accessory_Factors_Involved_in_Transport	8.A.104.1.2	kinase-like protein	F:protein kinase activity; P:phosphorylation; C:intracellular part
B. dothidea	53_S186_L007_g9338.t1			hfid_381	CYP51				Pkinase		1.I.1	The_Eukaryotic_Nuclear_Pore_Complex_(E-NPC)_Family	_Channels/Pores	1.I.1.1.3	NEK protein kinase	P:microtubule cytoskeleton organization; F:protein kinase activity; F:ATP binding; P:protein phosphorylation; P:regulation of cell cycle process; P:regulation of organelle organization; C:mitotic spindle pole body
B. dothidea	53_S186_L007_g9650.t1			hfid_381	CYP51				Pkinase		9.A.15	The_Autophagy-related_Phagophore-formation_Transporter_(APT)_Family	_Incompletely_Characterized_Transport_Systems	9.A.15.3.1	serine/threonine-protein kinase 33-like isoform X1	P:cellular metabolic process
B. dothidea	53_S186_L007_g9806.t1			hfid_381	CYP51				Pkinase		8.A.104	The_5'-AMP-activated_protein_kinase_(AMPK)_Family	_Accessory_Factors_Involved_in_Transport	8.A.104.1.1	calcium/calmodulin-dependent protein kinase	F:calmodulin-dependent protein kinase activity; F:calmodulin binding; F:ATP binding; P:protein phosphorylation; P:cellular response to oxidative stress
B. dothidea	53_S186_L007_g9953.t1			hfid_375	CYP51
B. dothidea	53_S186_L007_g9964.t1			hfid_381	CYP51				Pkinase		9.B.106	The_Pock_Size-determining_Protein_(PSDP)_Family	_Incompletely_Characterized_Transport_Systems	9.B.106.3.1	serine/threonine protein kinase	F:protein serine/threonine kinase activity; P:peptidyl-serine phosphorylation; P:intracellular signal transduction
B. dothidea	53_S186_L007_g12138.t1			hfid_1435	CYP512				p450						cytochrome P450	F:binding; F:oxidoreductase activity
B. dothidea	53_S186_L007_g1774.t1			hfid_1435	CYP512				p450						ent-kaurene oxidase	F:monooxygenase activity; F:iron ion binding; C:integral component of membrane; F:oxidoreductase activity, acting on paired donors, with incorporation or reduction of molecular oxygen; F:heme binding; P:oxidation-reduction process
B. dothidea	53_S186_L007_g314.t1		terpene	hfid_1422	CYP512				p450;HMG_CoA_synt_N;HMG_CoA_synt_C						hydroxymethylglutaryl-CoA synthase	F:hydroxymethylglutaryl-CoA synthase activity; P:isoprenoid biosynthetic process; P:sterol biosynthetic process
B. dothidea	53_S186_L007_g6036.t1	Aspirochlorine	NRPS	hfid_1422	CYP512				p450;Peptidase_M19						cytochrome P450 oxidoreductase GliC	P:metabolic process; C:membrane; F:oxidoreductase activity; F:metal ion binding
B. dothidea	53_S186_L007_g6039.t1	Aspirochlorine	NRPS	hfid_1422	CYP512				p450						cytochrome P450	F:monooxygenase activity; F:iron ion binding; C:membrane; C:integral component of membrane; F:oxidoreductase activity; F:oxidoreductase activity, acting on paired donors, with incorporation or reduction of molecular oxygen; F:heme binding; F:metal ion binding; P:oxidation-reduction process
B. dothidea	53_S186_L007_g8083.t1			hfid_1422	CYP512				p450						cytochrome p450	F:binding; F:oxidoreductase activity
B. dothidea	53_S186_L007_g10052.t1			hfid_397	CYP52				p450						putative cytochrome p450 family protein	F:iron ion binding; C:integral component of membrane; F:oxidoreductase activity, acting on paired donors, with incorporation or reduction of molecular oxygen, reduced flavin or flavoprotein as one donor, and incorporation of one atom of oxygen; F:heme binding; P:oxidation-reduction process
B. dothidea	53_S186_L007_g12037.t1			hfid_436	CYP52				Abhydrolase_2						phospholipase/carboxylesterase, putative	C:membrane; C:integral component of membrane; F:hydrolase activity
B. dothidea	53_S186_L007_g1694.t1			hfid_392	CYP52				p450						n-alkane-inducible cytochrome P450	F:monooxygenase activity; F:oxidoreductase activity, acting on paired donors, with incorporation or reduction of molecular oxygen; F:metal ion binding
B. dothidea	53_S186_L007_g1699.t1			hfid_426	CYP52				GDC-P						glycine dehydrogenase	F:glycine dehydrogenase (decarboxylating) activity; C:mitochondrion; C:glycine cleavage complex; F:glycine binding; F:transferase activity; P:glycine decarboxylation via glycine cleavage system; F:pyridoxal phosphate binding; P:oxidation-reduction process
B. dothidea	53_S186_L007_g3069.t1			hfid_388	CYP52				p450						cytochrome P450	F:monooxygenase activity; F:hydrolase activity, hydrolyzing O-glycosyl compounds; F:iron ion binding; C:membrane; F:oxidoreductase activity, acting on paired donors, with incorporation or reduction of molecular oxygen; F:heme binding; P:oxidation-reduction process
B. dothidea	53_S186_L007_g3266.t1			hfid_397	CYP52				p450						cytochrome P450 52A12	F:iron ion binding; C:membrane; F:oxidoreductase activity, acting on paired donors, with incorporation or reduction of molecular oxygen, reduced flavin or flavoprotein as one donor, and incorporation of one atom of oxygen; F:heme binding; P:oxidation-reduction process
B. dothidea	53_S186_L007_g3505.t1	Alternapyrone	T1PKS	hfid_395	CYP52				p450						cytochrome P450	F:monooxygenase activity; F:iron ion binding; C:integral component of membrane; F:oxidoreductase activity, acting on paired donors, with incorporation or reduction of molecular oxygen; F:heme binding; P:oxidation-reduction process
B. dothidea	53_S186_L007_g4396.t1			hfid_397	CYP52				p450						cytochrome P450 52A12	F:iron ion binding; C:integral component of membrane; F:oxidoreductase activity, acting on paired donors, with incorporation or reduction of molecular oxygen, reduced flavin or flavoprotein as one donor, and incorporation of one atom of oxygen; F:heme binding; P:oxidation-reduction process
B. dothidea	53_S186_L007_g4926.t1			hfid_390	CYP52				p450						cytochrome P450	F:iron ion binding; C:membrane; F:oxidoreductase activity, acting on paired donors, with incorporation or reduction of molecular oxygen, reduced flavin or flavoprotein as one donor, and incorporation of one atom of oxygen; F:heme binding; P:oxidation-reduction process
B. dothidea	53_S186_L007_g5505.t1			hfid_428	CYP52				p450						cytochrome P450 52A11	F:binding
B. dothidea	53_S186_L007_g8096.t1			hfid_397	CYP52				p450	SP(Sec/SPI)					cytochrome P450 52A12	F:binding; F:oxidoreductase activity
B. dothidea	53_S186_L007_g8609.t1		T1PKS	hfid_389	CYP52				p450	SP(Sec/SPI)					cytochrome P450 alkane hydroxylase	F:iron ion binding; F:oxidoreductase activity, acting on paired donors, with incorporation or reduction of molecular oxygen, reduced flavin or flavoprotein as one donor, and incorporation of one atom of oxygen; F:heme binding; P:oxidation-reduction process
B. dothidea	53_S186_L007_g8753.t1			hfid_398	CYP52				p450						cytochrome P450 52A11	F:iron ion binding; F:oxidoreductase activity, acting on paired donors, with incorporation or reduction of molecular oxygen; F:heme binding; P:oxidation-reduction process
B. dothidea	53_S186_L007_g9092.t1		T1PKS	hfid_388	CYP52				p450						cytochrome P450	F:monooxygenase activity; F:iron ion binding; C:membrane; C:integral component of membrane; F:oxidoreductase activity; F:oxidoreductase activity, acting on paired donors, with incorporation or reduction of molecular oxygen; F:heme binding; F:metal ion binding; P:oxidation-reduction process
B. dothidea	53_S186_L007_g12092.t1			hfid_1696	CYP5280				p450						cytochrome P450 oxidoreductase	C:membrane; F:oxidoreductase activity; F:metal ion binding
B. dothidea	53_S186_L007_g1567.t1			hfid_1696	CYP5280				p450;Fungal_trans_2						benzoate 4-monooxygenase cytochrome p450	F:binding; F:oxidoreductase activity
B. dothidea	53_S186_L007_g8171.t1			hfid_1696	CYP5280				p450						cytochrome P450 monooxygenase	F:monooxygenase activity; F:iron ion binding; C:integral component of membrane; F:oxidoreductase activity, acting on paired donors, with incorporation or reduction of molecular oxygen; F:heme binding; P:oxidation-reduction process
B. dothidea	53_S186_L007_g4081.t1	Hexadehydro-astechrome_(HAS)	NRPS	hfid_1699	CYP5293				p450	SP(Sec/SPI)					cytochrome P450 monooxygenase	F:monooxygenase activity; F:iron ion binding; F:oxidoreductase activity, acting on paired donors, with incorporation or reduction of molecular oxygen; F:heme binding; P:oxidation-reduction process
B. dothidea	53_S186_L007_g5553.t1			hfid_439	CYP53			New_NoxC|New_Rbohs|New_NoxA|New_Doux|New_NoxB	Zn_clus;Cyt-b5;FMN_dh;Ferric_reduct;MFS_1;FAD_binding_8;NAD_binding_6		2.A.1	The_Major_Facilitator_Superfamily_(MFS)	_Electrochemical_Potential-driven_Transporters	2.A.1.14.11	FAD-binding domain-containing protein	F:calcium ion binding; C:integral component of membrane; F:oxidoreductase activity; F:heme binding; P:oxidation-reduction process
B. dothidea	53_S186_L007_g10158.t1	Leucinostatins	T1PKS|NRPS	hfid_443	CYP53				MFS_1		2.A.1	The_Major_Facilitator_Superfamily_(MFS)	_Electrochemical_Potential-driven_Transporters	2.A.1.13.4	MFS general substrate transporter	C:integral component of membrane; P:transmembrane transport
B. dothidea	53_S186_L007_g10231.t1		NRPS-like	hfid_439	CYP53				MFS_1		2.A.1	The_Major_Facilitator_Superfamily_(MFS)	_Electrochemical_Potential-driven_Transporters	2.A.1.14.11	MFS transporter	C:integral component of membrane; F:transmembrane transporter activity; P:transmembrane transport
B. dothidea	53_S186_L007_g10250.t1			hfid_443	CYP53				Citrate_synt						citrate synthase, mitochondrial precursor	F:citrate (Si)-synthase activity; C:mitochondrial matrix; P:carbohydrate metabolic process; P:tricarboxylic acid cycle; P:citrate metabolic process
B. dothidea	53_S186_L007_g10347.t1			hfid_439	CYP53				MFS_1		2.A.1	The_Major_Facilitator_Superfamily_(MFS)	_Electrochemical_Potential-driven_Transporters	2.A.1.14.17	putative pantothenate protein	C:integral component of membrane; P:transmembrane transport
B. dothidea	53_S186_L007_g10418.t1			hfid_439	CYP53				MFS_1		2.A.1	The_Major_Facilitator_Superfamily_(MFS)	_Electrochemical_Potential-driven_Transporters	2.A.1.14.4	MFS general substrate transporter	C:integral component of membrane; P:transmembrane transport
B. dothidea	53_S186_L007_g10591.t1		NRPS	hfid_439	CYP53				MFS_1		2.A.1	The_Major_Facilitator_Superfamily_(MFS)	_Electrochemical_Potential-driven_Transporters	2.A.1.14.20	allantoate permease	C:integral component of membrane; F:transmembrane transporter activity; P:transmembrane transport
B. dothidea	53_S186_L007_g10883.t1			hfid_443	CYP53				MFS_1		2.A.1	The_Major_Facilitator_Superfamily_(MFS)	_Electrochemical_Potential-driven_Transporters	2.A.1.13.18	Major facilitator superfamily domain, general substrate transporter	C:integral component of membrane; P:transmembrane transport
B. dothidea	53_S186_L007_g11152.t1		NRPS	hfid_439	CYP53				MFS_1		2.A.1	The_Major_Facilitator_Superfamily_(MFS)	_Electrochemical_Potential-driven_Transporters	2.A.1.14.36	allantoin permease	C:integral component of membrane; P:transmembrane transport
B. dothidea	53_S186_L007_g11196.t1			hfid_443	CYP53				MFS_1		2.A.1	The_Major_Facilitator_Superfamily_(MFS)	_Electrochemical_Potential-driven_Transporters	2.A.1.13.18	MFS general substrate transporter	C:integral component of membrane; P:transmembrane transport
B. dothidea	53_S186_L007_g11207.t1			hfid_439	CYP53				MFS_1		2.A.1	The_Major_Facilitator_Superfamily_(MFS)	_Electrochemical_Potential-driven_Transporters	2.A.1.14.11	putative major facilitator superfamily protein	C:integral component of membrane; F:transmembrane transporter activity; P:transmembrane transport
B. dothidea	53_S186_L007_g11413.t1			hfid_439	CYP53				MFS_1		2.A.1	The_Major_Facilitator_Superfamily_(MFS)	_Electrochemical_Potential-driven_Transporters	2.A.1.14.38	MFS transporter, putative	C:integral component of membrane; F:transmembrane transporter activity; P:transmembrane transport
B. dothidea	53_S186_L007_g11420.t1			hfid_439	CYP53				MFS_1		2.A.1	The_Major_Facilitator_Superfamily_(MFS)	_Electrochemical_Potential-driven_Transporters	2.A.1.14.11	major facilitator superfamily transporter	C:integral component of membrane; P:transmembrane transport
B. dothidea	53_S186_L007_g11648.t1			hfid_439	CYP53				MFS_1		2.A.1	The_Major_Facilitator_Superfamily_(MFS)	_Electrochemical_Potential-driven_Transporters	2.A.1.14.11	MFS transporter	F:cytoskeletal protein binding; C:integral component of membrane; F:transmembrane transporter activity; F:protein binding, bridging; F:identical protein binding; F:ubiquitin binding; P:transmembrane transport
B. dothidea	53_S186_L007_g11708.t1			hfid_439	CYP53				MFS_1		2.A.1	The_Major_Facilitator_Superfamily_(MFS)	_Electrochemical_Potential-driven_Transporters	2.A.1.14.17	C6 transcription factor	F:DNA-binding transcription factor activity, RNA polymerase II-specific; C:nucleus; P:regulation of transcription by RNA polymerase II; F:zinc ion binding; C:integral component of membrane; P:transmembrane transport
B. dothidea	53_S186_L007_g11855.t1			hfid_439	CYP53						2.A.1	The_Major_Facilitator_Superfamily_(MFS)	_Electrochemical_Potential-driven_Transporters	2.A.1.14.11	retrograde regulation protein 2	C:integral component of membrane; P:transmembrane transport
B. dothidea	53_S186_L007_g12038.t1			hfid_443	CYP53				MFS_1;Methyltransf_23		2.A.1	The_Major_Facilitator_Superfamily_(MFS)	_Electrochemical_Potential-driven_Transporters	2.A.1.13.18	putative mfs transporter protein	C:integral component of membrane; P:transmembrane transport
B. dothidea	53_S186_L007_g12091.t1			hfid_439	CYP53				MFS_1		2.A.1	The_Major_Facilitator_Superfamily_(MFS)	_Electrochemical_Potential-driven_Transporters	2.A.1.14.11	major facilitator superfamily transporter	C:integral component of membrane; P:transmembrane transport
B. dothidea	53_S186_L007_g12229.t1			hfid_440	CYP53				p450						cytochrome P450	F:monooxygenase activity; F:transporter activity; F:iron ion binding; C:integral component of membrane; F:oxidoreductase activity, acting on paired donors, with incorporation or reduction of molecular oxygen; F:heme binding; P:oxidation-reduction process
B. dothidea	53_S186_L007_g1275.t1			hfid_439	CYP53				MFS_1		2.A.1	The_Major_Facilitator_Superfamily_(MFS)	_Electrochemical_Potential-driven_Transporters	2.A.1.14.11	high-affinity nicotinic acid transporter	F:homoaconitate hydratase activity; C:mitochondrion; C:integral component of membrane; P:lysine biosynthetic process via aminoadipic acid; F:transmembrane transporter activity; F:metal ion binding; F:4 iron, 4 sulfur cluster binding; P:transmembrane transport
B. dothidea	53_S186_L007_g1288.t1			hfid_439	CYP53				MFS_1		2.A.1	The_Major_Facilitator_Superfamily_(MFS)	_Electrochemical_Potential-driven_Transporters	2.A.1.14.11	retrograde regulation protein 2	C:integral component of membrane; F:transmembrane transporter activity; P:transmembrane transport
B. dothidea	53_S186_L007_g143.t1			hfid_439	CYP53				MFS_1		2.A.1	The_Major_Facilitator_Superfamily_(MFS)	_Electrochemical_Potential-driven_Transporters	2.A.1.14.11	phthalate transporter	C:membrane; C:integral component of membrane; P:transmembrane transport
B. dothidea	53_S186_L007_g1468.t1			hfid_439	CYP53				MFS_1		2.A.1	The_Major_Facilitator_Superfamily_(MFS)	_Electrochemical_Potential-driven_Transporters	2.A.1.14.11	putative phthalate transporter protein	C:integral component of membrane; P:transmembrane transport
B. dothidea	53_S186_L007_g1666.t1			hfid_439	CYP53				MFS_1		2.A.1	The_Major_Facilitator_Superfamily_(MFS)	_Electrochemical_Potential-driven_Transporters	2.A.1.14.17	major facilitator superfamily transporter	C:integral component of membrane; P:transmembrane transport
B. dothidea	53_S186_L007_g1747.t1			hfid_443	CYP53				MFS_1		2.A.1	The_Major_Facilitator_Superfamily_(MFS)	_Electrochemical_Potential-driven_Transporters	2.A.1.13.19	MFS general substrate transporter	C:integral component of membrane; P:transmembrane transport
B. dothidea	53_S186_L007_g194.t1			hfid_439	CYP53				MFS_1		2.A.1	The_Major_Facilitator_Superfamily_(MFS)	_Electrochemical_Potential-driven_Transporters	2.A.1.14.11	MFS general substrate transporter	C:plasma membrane; C:integral component of membrane; F:transmembrane transporter activity; P:transmembrane transport
B. dothidea	53_S186_L007_g1967.t1			hfid_439	CYP53				MFS_1		2.A.1	The_Major_Facilitator_Superfamily_(MFS)	_Electrochemical_Potential-driven_Transporters	2.A.1.14.17	putative vitamin h transporter protein	C:integral component of membrane; P:transmembrane transport
B. dothidea	53_S186_L007_g1995.t1			hfid_439	CYP53				MFS_1		2.A.1	The_Major_Facilitator_Superfamily_(MFS)	_Electrochemical_Potential-driven_Transporters	2.A.1.14.11	MFS transporter	C:integral component of membrane; P:transmembrane transport
B. dothidea	53_S186_L007_g2415.t1		NRPS-like	hfid_443	CYP53				MFS_1		2.A.1	The_Major_Facilitator_Superfamily_(MFS)	_Electrochemical_Potential-driven_Transporters	2.A.1.13.4	MFS monocarboxylate transporter	C:integral component of membrane; P:transmembrane transport
B. dothidea	53_S186_L007_g2481.t1			hfid_443	CYP53				MFS_1		2.A.1	The_Major_Facilitator_Superfamily_(MFS)	_Electrochemical_Potential-driven_Transporters	2.A.1.13.4	oxalate/formate antiporter	C:membrane
B. dothidea	53_S186_L007_g2646.t1			hfid_439	CYP53				MFS_1		2.A.1	The_Major_Facilitator_Superfamily_(MFS)	_Electrochemical_Potential-driven_Transporters	2.A.1.14.17	MFS general substrate transporter	C:integral component of membrane; F:transmembrane transporter activity; P:transmembrane transport
B. dothidea	53_S186_L007_g2659.t1			hfid_439	CYP53				MFS_1		2.A.1	The_Major_Facilitator_Superfamily_(MFS)	_Electrochemical_Potential-driven_Transporters	2.A.1.14.11	MFS general substrate transporter	C:integral component of membrane; F:transmembrane transporter activity; P:transmembrane transport
B. dothidea	53_S186_L007_g2717.t1			hfid_443	CYP53				MFS_1		2.A.1	The_Major_Facilitator_Superfamily_(MFS)	_Electrochemical_Potential-driven_Transporters	2.A.1.13.5	Monocarboxylate transporter	C:integral component of membrane; P:transmembrane transport
B. dothidea	53_S186_L007_g2768.t1			hfid_439	CYP53				MFS_1		2.A.1	The_Major_Facilitator_Superfamily_(MFS)	_Electrochemical_Potential-driven_Transporters	2.A.1.14.11	MFS general substrate transporter	C:integral component of membrane; P:transmembrane transport
B. dothidea	53_S186_L007_g2819.t1			hfid_439	CYP53				MFS_1		2.A.1	The_Major_Facilitator_Superfamily_(MFS)	_Electrochemical_Potential-driven_Transporters	2.A.1.14.4	MFS allantoate transporter, putative	C:integral component of membrane; F:transmembrane transporter activity; P:transmembrane transport
B. dothidea	53_S186_L007_g2892.t1			hfid_439	CYP53				MFS_1		2.A.1	The_Major_Facilitator_Superfamily_(MFS)	_Electrochemical_Potential-driven_Transporters	2.A.1.14.11	MFS general substrate transporter	C:Golgi membrane; F:pyrimidine nucleotide-sugar transmembrane transporter activity; C:integral component of membrane; P:pyrimidine nucleotide-sugar transmembrane transport
B. dothidea	53_S186_L007_g2940.t1			hfid_439	CYP53				MFS_1		2.A.1	The_Major_Facilitator_Superfamily_(MFS)	_Electrochemical_Potential-driven_Transporters	2.A.1.14.4	MFS transporter, ACS family, allantoate permease	C:integral component of membrane; P:transmembrane transport
B. dothidea	53_S186_L007_g2992.t1		T1PKS	hfid_439	CYP53				MFS_1		2.A.1	The_Major_Facilitator_Superfamily_(MFS)	_Electrochemical_Potential-driven_Transporters	2.A.1.14.4	putative mfs allantoate protein	C:integral component of membrane; P:transmembrane transport
B. dothidea	53_S186_L007_g3009.t1			hfid_439	CYP53				MFS_1		2.A.1	The_Major_Facilitator_Superfamily_(MFS)	_Electrochemical_Potential-driven_Transporters	2.A.1.14.11	Vitamin H transporter	C:integral component of membrane; F:transmembrane transporter activity; P:transmembrane transport
B. dothidea	53_S186_L007_g3097.t1			hfid_443	CYP53				MFS_1		2.A.1	The_Major_Facilitator_Superfamily_(MFS)	_Electrochemical_Potential-driven_Transporters	2.A.1.13.4	MFS monocarboxylate transporter	C:integral component of membrane; P:transmembrane transport
B. dothidea	53_S186_L007_g3101.t1			hfid_439	CYP53				MFS_1		2.A.1	The_Major_Facilitator_Superfamily_(MFS)	_Electrochemical_Potential-driven_Transporters	2.A.1.14.11	MFS transporter	C:integral component of membrane; F:transmembrane transporter activity; P:transmembrane transport
B. dothidea	53_S186_L007_g3104.t1			hfid_439	CYP53				MFS_1		2.A.1	The_Major_Facilitator_Superfamily_(MFS)	_Electrochemical_Potential-driven_Transporters	2.A.1.14.4	membrane transporter	C:integral component of membrane; P:transmembrane transport
B. dothidea	53_S186_L007_g3293.t1			hfid_439	CYP53				MFS_1		2.A.1	The_Major_Facilitator_Superfamily_(MFS)	_Electrochemical_Potential-driven_Transporters	2.A.1.14.17	MFS pantothenate transporter	F:DNA binding; C:nucleus; P:transcription, DNA-templated; F:zinc ion binding; C:integral component of membrane; P:transmembrane transport
B. dothidea	53_S186_L007_g3333.t1			hfid_439	CYP53				MFS_1		2.A.1	The_Major_Facilitator_Superfamily_(MFS)	_Electrochemical_Potential-driven_Transporters	2.A.1.14.36	allantoate permease	C:integral component of membrane; P:transmembrane transport
B. dothidea	53_S186_L007_g3339.t1			hfid_439	CYP53				MFS_1		2.A.1	The_Major_Facilitator_Superfamily_(MFS)	_Electrochemical_Potential-driven_Transporters	2.A.1.14.4	MFS allantoate transporter	C:integral component of membrane
B. dothidea	53_S186_L007_g3382.t1			hfid_439	CYP53				MFS_1		2.A.1	The_Major_Facilitator_Superfamily_(MFS)	_Electrochemical_Potential-driven_Transporters	2.A.1.14.11	MFS general substrate transporter	C:integral component of membrane; P:transmembrane transport
B. dothidea	53_S186_L007_g3450.t1			hfid_439	CYP53				MFS_1		2.A.1	The_Major_Facilitator_Superfamily_(MFS)	_Electrochemical_Potential-driven_Transporters	2.A.1.14.19	MFS general substrate transporter	C:integral component of membrane; P:transmembrane transport
B. dothidea	53_S186_L007_g3459.t1			hfid_439	CYP53				MFS_1		2.A.1	The_Major_Facilitator_Superfamily_(MFS)	_Electrochemical_Potential-driven_Transporters	2.A.1.14.11	MFS general substrate transporter	C:integral component of membrane; F:transmembrane transporter activity; P:transmembrane transport
B. dothidea	53_S186_L007_g3468.t1			hfid_439	CYP53				MFS_1		2.A.1	The_Major_Facilitator_Superfamily_(MFS)	_Electrochemical_Potential-driven_Transporters	2.A.1.14.4	Major facilitator superfamily transporter	C:integral component of membrane; P:transmembrane transport
B. dothidea	53_S186_L007_g3521.t1			hfid_439	CYP53				MFS_1		2.A.1	The_Major_Facilitator_Superfamily_(MFS)	_Electrochemical_Potential-driven_Transporters	2.A.1.14.4	MFS general substrate transporter	C:integral component of membrane; F:transmembrane transporter activity; P:transmembrane transport
B. dothidea	53_S186_L007_g3547.t1			hfid_439	CYP53				MFS_1		2.A.1	The_Major_Facilitator_Superfamily_(MFS)	_Electrochemical_Potential-driven_Transporters	2.A.1.14.3	MFS transporter	C:integral component of membrane; F:transmembrane transporter activity; P:transmembrane transport
B. dothidea	53_S186_L007_g3752.t1			hfid_439	CYP53				MFS_1		2.A.1	The_Major_Facilitator_Superfamily_(MFS)	_Electrochemical_Potential-driven_Transporters	2.A.1.14.4	MFS allantoate transporter	C:integral component of membrane; F:transmembrane transporter activity; P:transmembrane transport
B. dothidea	53_S186_L007_g40.t1			hfid_439	CYP53				MFS_1		2.A.1	The_Major_Facilitator_Superfamily_(MFS)	_Electrochemical_Potential-driven_Transporters	2.A.1.14.37	MFS general substrate transporter	C:integral component of membrane; F:transmembrane transporter activity; P:transmembrane transport
B. dothidea	53_S186_L007_g4082.t1	Hexadehydro-astechrome_(HAS)	NRPS	hfid_443	CYP53				MFS_1		2.A.1	The_Major_Facilitator_Superfamily_(MFS)	_Electrochemical_Potential-driven_Transporters	2.A.1.13.4	MFS transporter	C:integral component of membrane; P:secondary metabolite biosynthetic process; P:transmembrane transport
B. dothidea	53_S186_L007_g42.t1			hfid_439	CYP53				MFS_1		2.A.1	The_Major_Facilitator_Superfamily_(MFS)	_Electrochemical_Potential-driven_Transporters	2.A.1.14.3	putative pantothenate transporter protein	C:integral component of membrane; F:transmembrane transporter activity; P:transmembrane transport
B. dothidea	53_S186_L007_g4258.t1			hfid_439	CYP53				MFS_1		2.A.1	The_Major_Facilitator_Superfamily_(MFS)	_Electrochemical_Potential-driven_Transporters	2.A.1.14.36	allantoate permease	C:integral component of membrane; F:transmembrane transporter activity; P:transmembrane transport
B. dothidea	53_S186_L007_g4366.t1			hfid_439	CYP53				MFS_1		2.A.1	The_Major_Facilitator_Superfamily_(MFS)	_Electrochemical_Potential-driven_Transporters	2.A.1.14.38	Alternative sulfate transporter	C:integral component of membrane; F:transmembrane transporter activity; P:transmembrane transport
B. dothidea	53_S186_L007_g4392.t1			hfid_439	CYP53				MFS_1		2.A.1	The_Major_Facilitator_Superfamily_(MFS)	_Electrochemical_Potential-driven_Transporters	2.A.1.14.4	putative mfs allantoate transporter protein	C:integral component of membrane; P:transmembrane transport
B. dothidea	53_S186_L007_g4420.t1			hfid_439	CYP53				MFS_1		2.A.1	The_Major_Facilitator_Superfamily_(MFS)	_Electrochemical_Potential-driven_Transporters	2.A.1.14.4	MFS general substrate transporter	C:integral component of membrane; P:transmembrane transport
B. dothidea	53_S186_L007_g4593.t1	Brefeldin	T1PKS|NRPS	hfid_439	CYP53				MFS_1		2.A.1	The_Major_Facilitator_Superfamily_(MFS)	_Electrochemical_Potential-driven_Transporters	2.A.1.14.4	pantothenate transporter	C:integral component of membrane; P:transmembrane transport
B. dothidea	53_S186_L007_g469.t1	ACT-Toxin	NRPS-like|NRPS|T1PKS	hfid_439	CYP53				MFS_1		2.A.1	The_Major_Facilitator_Superfamily_(MFS)	_Electrochemical_Potential-driven_Transporters	2.A.1.14.4	MFS transporter	C:integral component of membrane; F:transmembrane transporter activity; P:transmembrane transport
B. dothidea	53_S186_L007_g4694.t1			hfid_439	CYP53				RTC;MFS_1		2.A.1	The_Major_Facilitator_Superfamily_(MFS)	_Electrochemical_Potential-driven_Transporters	2.A.1.14.4	allantoin permease	C:integral component of membrane; F:transmembrane transporter activity; P:transmembrane transport
B. dothidea	53_S186_L007_g4747.t1			hfid_439	CYP53				MFS_1		2.A.1	The_Major_Facilitator_Superfamily_(MFS)	_Electrochemical_Potential-driven_Transporters	2.A.1.14.11	MFS general substrate transporter	C:integral component of membrane; F:transmembrane transporter activity; P:transmembrane transport
B. dothidea	53_S186_L007_g4935.t1			hfid_439	CYP53				MFS_1		2.A.1	The_Major_Facilitator_Superfamily_(MFS)	_Electrochemical_Potential-driven_Transporters	2.A.1.14.11	vitamin H transporter	C:integral component of membrane; F:transmembrane transporter activity; P:transmembrane transport
B. dothidea	53_S186_L007_g4965.t1			hfid_439	CYP53				MFS_1		2.A.1	The_Major_Facilitator_Superfamily_(MFS)	_Electrochemical_Potential-driven_Transporters	2.A.1.14.3	allantoate permease	C:integral component of membrane; F:transmembrane transporter activity; P:transmembrane transport
B. dothidea	53_S186_L007_g5026.t1			hfid_439	CYP53				MFS_1		2.A.1	The_Major_Facilitator_Superfamily_(MFS)	_Electrochemical_Potential-driven_Transporters	2.A.1.14.11	putative high-affinity nicotinic acid transporter protein	F:DNA binding; C:nucleus; P:transcription, DNA-templated; F:zinc ion binding; C:integral component of membrane; F:carboxylic acid transmembrane transporter activity; P:transmembrane transport
B. dothidea	53_S186_L007_g5086.t1			hfid_439	CYP53				MFS_1		2.A.1	The_Major_Facilitator_Superfamily_(MFS)	_Electrochemical_Potential-driven_Transporters	2.A.1.14.38	MFS general substrate transporter	C:integral component of membrane; P:transmembrane transport
B. dothidea	53_S186_L007_g5135.t1			hfid_443	CYP53				Citrate_synt						2-methylcitrate synthase, mitochondrial	F:citrate (Si)-synthase activity; C:mitochondrial matrix; P:carbohydrate metabolic process; P:tricarboxylic acid cycle; P:citrate metabolic process; P:propionate metabolic process, methylcitrate cycle; F:2-methylcitrate synthase activity
B. dothidea	53_S186_L007_g5177.t1			hfid_439	CYP53				MFS_1		2.A.1	The_Major_Facilitator_Superfamily_(MFS)	_Electrochemical_Potential-driven_Transporters	2.A.1.14.20	Major facilitator superfamily domain, general substrate transporter	C:integral component of membrane; F:transmembrane transporter activity; P:transmembrane transport
B. dothidea	53_S186_L007_g534.t1			hfid_439	CYP53				MFS_1		2.A.1	The_Major_Facilitator_Superfamily_(MFS)	_Electrochemical_Potential-driven_Transporters	2.A.1.14.11	putative permease of the major facilitator superfamily protein	C:integral component of membrane; P:transmembrane transport
B. dothidea	53_S186_L007_g535.t1			hfid_439	CYP53				MFS_1		2.A.1	The_Major_Facilitator_Superfamily_(MFS)	_Electrochemical_Potential-driven_Transporters	2.A.1.14.17	MFS general substrate transporter	F:N,N-dimethylaniline monooxygenase activity; C:integral component of membrane; F:transmembrane transporter activity; F:flavin adenine dinucleotide binding; F:NADP binding; P:transmembrane transport; P:oxidation-reduction process
B. dothidea	53_S186_L007_g5354.t1			hfid_439	CYP53				p450						benzoate 4-monooxygenase cytochrome P450	F:oxidoreductase activity; F:metal ion binding
B. dothidea	53_S186_L007_g5507.t1			hfid_439	CYP53				MFS_1		2.A.1	The_Major_Facilitator_Superfamily_(MFS)	_Electrochemical_Potential-driven_Transporters	2.A.1.14.4	major facilitator superfamily transporter	C:membrane
B. dothidea	53_S186_L007_g5545.t1			hfid_439	CYP53	GT25			MFS_1		2.A.1	The_Major_Facilitator_Superfamily_(MFS)	_Electrochemical_Potential-driven_Transporters	2.A.1.14.3	MFS transporter	C:integral component of membrane; P:transmembrane transport
B. dothidea	53_S186_L007_g5742.t1			hfid_439	CYP53				MFS_1		2.A.1	The_Major_Facilitator_Superfamily_(MFS)	_Electrochemical_Potential-driven_Transporters	2.A.1.14.11	MFS transporter	C:integral component of membrane; P:transmembrane transport
B. dothidea	53_S186_L007_g5823.t1			hfid_439	CYP53				MFS_1		2.A.1	The_Major_Facilitator_Superfamily_(MFS)	_Electrochemical_Potential-driven_Transporters	2.A.1.14.4	allantoate permease, putative	C:integral component of membrane; P:transmembrane transport
B. dothidea	53_S186_L007_g5924.t1			hfid_439	CYP53				MFS_1		2.A.1	The_Major_Facilitator_Superfamily_(MFS)	_Electrochemical_Potential-driven_Transporters	2.A.1.14.11	vitamin H transporter	C:integral component of membrane; P:transmembrane transport
B. dothidea	53_S186_L007_g5925.t1			hfid_439	CYP53				MFS_1		2.A.1	The_Major_Facilitator_Superfamily_(MFS)	_Electrochemical_Potential-driven_Transporters	2.A.1.14.11	vitamin H transporter	C:integral component of membrane; F:transmembrane transporter activity; P:transmembrane transport
B. dothidea	53_S186_L007_g5982.t1			hfid_443	CYP53				MFS_1		2.A.1	The_Major_Facilitator_Superfamily_(MFS)	_Electrochemical_Potential-driven_Transporters	2.A.1.13.4	MFS general substrate transporter	C:integral component of membrane; P:transmembrane transport
B. dothidea	53_S186_L007_g5999.t1			hfid_439	CYP53				MFS_1		2.A.1	The_Major_Facilitator_Superfamily_(MFS)	_Electrochemical_Potential-driven_Transporters	2.A.1.14.11	MFS general substrate transporter	C:integral component of membrane; P:transmembrane transport
B. dothidea	53_S186_L007_g6110.t1		T1PKS	hfid_443	CYP53				MFS_1		2.A.1	The_Major_Facilitator_Superfamily_(MFS)	_Electrochemical_Potential-driven_Transporters	2.A.1.13.19	putative monocarboxylate permease-like protein	C:membrane
B. dothidea	53_S186_L007_g6138.t1	Phomopsins	NRPS-like|T1PKS	hfid_443	CYP53				MFS_1		2.A.1	The_Major_Facilitator_Superfamily_(MFS)	_Electrochemical_Potential-driven_Transporters	2.A.1.13.19	MFS general substrate transporter	F:nucleotide binding; F:ATP binding; C:membrane; C:integral component of membrane; P:transmembrane transport
B. dothidea	53_S186_L007_g6223.t1			hfid_439	CYP53				MFS_1		2.A.1	The_Major_Facilitator_Superfamily_(MFS)	_Electrochemical_Potential-driven_Transporters	2.A.1.14.38	major facilitator superfamily transporter	F:sulfate transmembrane transporter activity; C:integral component of membrane; P:sulfate transmembrane transport
B. dothidea	53_S186_L007_g6268.t1			hfid_439	CYP53				MFS_1		2.A.1	The_Major_Facilitator_Superfamily_(MFS)	_Electrochemical_Potential-driven_Transporters	2.A.1.14.11	MFS transporter	C:integral component of membrane; P:transmembrane transport
B. dothidea	53_S186_L007_g6450.t1			hfid_439	CYP53				MFS_1		2.A.1	The_Major_Facilitator_Superfamily_(MFS)	_Electrochemical_Potential-driven_Transporters	2.A.1.14.3	MFS general substrate transporter	C:integral component of membrane; F:transmembrane transporter activity; P:transmembrane transport
B. dothidea	53_S186_L007_g6539.t1			hfid_439	CYP53				MFS_1		2.A.1	The_Major_Facilitator_Superfamily_(MFS)	_Electrochemical_Potential-driven_Transporters	2.A.1.14.4	MFS general substrate transporter	C:integral component of membrane; P:transmembrane transport
B. dothidea	53_S186_L007_g6621.t1			hfid_439	CYP53				MFS_1		2.A.1	The_Major_Facilitator_Superfamily_(MFS)	_Electrochemical_Potential-driven_Transporters	2.A.1.14.36	allantoate permease	C:integral component of membrane; P:transmembrane transport
B. dothidea	53_S186_L007_g6692.t1			hfid_439	CYP53				MFS_1		2.A.1	The_Major_Facilitator_Superfamily_(MFS)	_Electrochemical_Potential-driven_Transporters	2.A.1.14.11	MFS transporter, putative	C:membrane
B. dothidea	53_S186_L007_g6734.t1	Brefeldin	T1PKS	hfid_439	CYP53				MFS_1		2.A.1	The_Major_Facilitator_Superfamily_(MFS)	_Electrochemical_Potential-driven_Transporters	2.A.1.14.38	MFS general substrate transporter	C:integral component of membrane; F:transmembrane transporter activity; P:transmembrane transport
B. dothidea	53_S186_L007_g6976.t1			hfid_443	CYP53				MFS_1		2.A.1	The_Major_Facilitator_Superfamily_(MFS)	_Electrochemical_Potential-driven_Transporters	2.A.1.13.26	MFS monocarboxylate transporter	C:integral component of membrane; P:transmembrane transport
B. dothidea	53_S186_L007_g7159.t1			hfid_439	CYP53				MFS_1		2.A.1	The_Major_Facilitator_Superfamily_(MFS)	_Electrochemical_Potential-driven_Transporters	2.A.1.14.11	MFS transporter	C:integral component of membrane; F:carboxylic acid transmembrane transporter activity; P:carboxylic acid transmembrane transport
B. dothidea	53_S186_L007_g7298.t1			hfid_439	CYP53				MFS_1		2.A.1	The_Major_Facilitator_Superfamily_(MFS)	_Electrochemical_Potential-driven_Transporters	2.A.1.14.37	major facilitator superfamily transporter	P:cellular amino acid metabolic process; C:integral component of membrane; F:pyridoxal phosphate binding; P:transmembrane transport
B. dothidea	53_S186_L007_g7315.t1			hfid_439	CYP53				MFS_1		2.A.1	The_Major_Facilitator_Superfamily_(MFS)	_Electrochemical_Potential-driven_Transporters	2.A.1.14.36	putative allantoate transport protein	C:integral component of membrane; F:transmembrane transporter activity; P:transmembrane transport
B. dothidea	53_S186_L007_g732.t1			hfid_439	CYP53				MFS_1		2.A.1	The_Major_Facilitator_Superfamily_(MFS)	_Electrochemical_Potential-driven_Transporters	2.A.1.14.11	putative phthalate transporter protein	C:integral component of membrane; F:transmembrane transporter activity; P:transmembrane transport
B. dothidea	53_S186_L007_g7334.t1			hfid_439	CYP53				MFS_1		2.A.1	The_Major_Facilitator_Superfamily_(MFS)	_Electrochemical_Potential-driven_Transporters	2.A.1.14.3	pantothenate transporter liz1	C:integral component of membrane; P:transmembrane transport
B. dothidea	53_S186_L007_g7664.t1			hfid_439	CYP53				PhyH;MFS_1		2.A.1	The_Major_Facilitator_Superfamily_(MFS)	_Electrochemical_Potential-driven_Transporters	2.A.1.14.4	MFS allantoate transporter	C:integral component of membrane; F:transmembrane transporter activity; P:transmembrane transport
B. dothidea	53_S186_L007_g7696.t1			hfid_439	CYP53				MFS_1		2.A.1	The_Major_Facilitator_Superfamily_(MFS)	_Electrochemical_Potential-driven_Transporters	2.A.1.14.43	MFS general substrate transporter	C:integral component of membrane; F:transmembrane transporter activity; P:transmembrane transport
B. dothidea	53_S186_L007_g7779.t1		NRPS-like	hfid_439	CYP53				MFS_1		2.A.1	The_Major_Facilitator_Superfamily_(MFS)	_Electrochemical_Potential-driven_Transporters	2.A.1.14.11	MFS transporter	C:integral component of membrane; F:transmembrane transporter activity; P:transmembrane transport
B. dothidea	53_S186_L007_g7848.t1		T3PKS|NRPS	hfid_439	CYP53				MFS_1		2.A.1	The_Major_Facilitator_Superfamily_(MFS)	_Electrochemical_Potential-driven_Transporters	2.A.1.14.18	major facilitator superfamily transporter	C:integral component of membrane; P:transmembrane transport
B. dothidea	53_S186_L007_g7986.t1			hfid_439	CYP53				MFS_1		2.A.1	The_Major_Facilitator_Superfamily_(MFS)	_Electrochemical_Potential-driven_Transporters	2.A.1.14.11	retrograde regulation protein 2	F:catalytic activity; P:carbohydrate metabolic process; C:integral component of membrane; P:transmembrane transport
B. dothidea	53_S186_L007_g8011.t1			hfid_439	CYP53				MFS_1		2.A.1	The_Major_Facilitator_Superfamily_(MFS)	_Electrochemical_Potential-driven_Transporters	2.A.1.14.11	phthalate transporter	C:membrane; C:integral component of membrane; P:transmembrane transport
B. dothidea	53_S186_L007_g802.t1			hfid_443	CYP53				MFS_1		2.A.1	The_Major_Facilitator_Superfamily_(MFS)	_Electrochemical_Potential-driven_Transporters	2.A.1.13.4	MFS general substrate transporter	C:integral component of membrane; P:transmembrane transport
B. dothidea	53_S186_L007_g8151.t1			hfid_443	CYP53				Citrate_synt						citrate synthase	P:tricarboxylic acid cycle; F:transferase activity, transferring acyl groups, acyl groups converted into alkyl on transfer
B. dothidea	53_S186_L007_g8208.t1			hfid_439	CYP53				MFS_1		2.A.1	The_Major_Facilitator_Superfamily_(MFS)	_Electrochemical_Potential-driven_Transporters	2.A.1.14.17	vitamin H transporter	C:integral component of membrane; P:transmembrane transport
B. dothidea	53_S186_L007_g8255.t1			hfid_443	CYP53				MFS_1		2.A.1	The_Major_Facilitator_Superfamily_(MFS)	_Electrochemical_Potential-driven_Transporters	2.A.1.13.18	MFS general substrate transporter	C:membrane
B. dothidea	53_S186_L007_g8297.t1			hfid_439	CYP53				MFS_1		2.A.1	The_Major_Facilitator_Superfamily_(MFS)	_Electrochemical_Potential-driven_Transporters	2.A.1.14.11	MFS general substrate transporter	C:integral component of membrane; F:transmembrane transporter activity; P:transmembrane transport
B. dothidea	53_S186_L007_g8484.t1			hfid_439	CYP53				p450						putative P450 monooxygenase	F:monooxygenase activity; F:iron ion binding; C:integral component of membrane; F:oxidoreductase activity, acting on paired donors, with incorporation or reduction of molecular oxygen; F:heme binding; P:oxidation-reduction process
B. dothidea	53_S186_L007_g8633.t1			hfid_439	CYP53				MFS_1		2.A.1	The_Major_Facilitator_Superfamily_(MFS)	_Electrochemical_Potential-driven_Transporters	2.A.1.14.11	allantoate permease, putative	C:integral component of membrane; P:transmembrane transport
B. dothidea	53_S186_L007_g8771.t1			hfid_439	CYP53				MFS_1		2.A.1	The_Major_Facilitator_Superfamily_(MFS)	_Electrochemical_Potential-driven_Transporters	2.A.1.14.11	MFS general substrate transporter	C:membrane
B. dothidea	53_S186_L007_g8787.t1			hfid_439	CYP53				MFS_1		2.A.1	The_Major_Facilitator_Superfamily_(MFS)	_Electrochemical_Potential-driven_Transporters	2.A.1.14.18	pantothenate transporter	C:integral component of membrane; P:transmembrane transport
B. dothidea	53_S186_L007_g886.t1			hfid_439	CYP53				MFS_1		2.A.1	The_Major_Facilitator_Superfamily_(MFS)	_Electrochemical_Potential-driven_Transporters	2.A.1.14.11	MFS transporter, putative	C:membrane
B. dothidea	53_S186_L007_g9031.t1			hfid_439	CYP53				MFS_1		2.A.1	The_Major_Facilitator_Superfamily_(MFS)	_Electrochemical_Potential-driven_Transporters	2.A.1.14.17	major facilitator superfamily transporter	C:integral component of membrane; P:transmembrane transport
B. dothidea	53_S186_L007_g9289.t1			hfid_439	CYP53				MFS_1		2.A.1	The_Major_Facilitator_Superfamily_(MFS)	_Electrochemical_Potential-driven_Transporters	2.A.1.14.36	allantoate permease	C:integral component of membrane; P:transmembrane transport
B. dothidea	53_S186_L007_g9360.t1			hfid_439	CYP53				MFS_1		2.A.1	The_Major_Facilitator_Superfamily_(MFS)	_Electrochemical_Potential-driven_Transporters	2.A.1.14.38	alternative sulfate transporter	C:integral component of membrane; P:transmembrane transport
B. dothidea	53_S186_L007_g9362.t1			hfid_439	CYP53				MFS_1		2.A.1	The_Major_Facilitator_Superfamily_(MFS)	_Electrochemical_Potential-driven_Transporters	2.A.1.14.17	pantothenate transporter liz1	C:integral component of membrane; P:transmembrane transport
B. dothidea	53_S186_L007_g9539.t1			hfid_439	CYP53				MFS_1		2.A.1	The_Major_Facilitator_Superfamily_(MFS)	_Electrochemical_Potential-driven_Transporters	2.A.1.14.38	alternative sulfate transporter	F:catalytic activity; C:membrane
B. dothidea	53_S186_L007_g9586.t1			hfid_439	CYP53				MFS_1		2.A.1	The_Major_Facilitator_Superfamily_(MFS)	_Electrochemical_Potential-driven_Transporters	2.A.1.14.4	allantoate permease	C:integral component of membrane; P:transmembrane transport
B. dothidea	53_S186_L007_g9596.t1			hfid_439	CYP53				Fungal_trans;MFS_1		2.A.1	The_Major_Facilitator_Superfamily_(MFS)	_Electrochemical_Potential-driven_Transporters	2.A.1.14.11	C6 transcription factor	F:binding
B. dothidea	53_S186_L007_g9627.t1			hfid_439	CYP53				MFS_1		2.A.1	The_Major_Facilitator_Superfamily_(MFS)	_Electrochemical_Potential-driven_Transporters	2.A.1.14.36	major facilitator superfamily transporter	C:integral component of membrane; P:transmembrane transport
B. dothidea	53_S186_L007_g978.t1			hfid_439	CYP53				MFS_1		2.A.1	The_Major_Facilitator_Superfamily_(MFS)	_Electrochemical_Potential-driven_Transporters	2.A.1.14.4	allantoate permease	F:DNA-binding transcription factor activity, RNA polymerase II-specific; C:nucleus; P:regulation of transcription by RNA polymerase II; F:zinc ion binding; C:integral component of membrane; P:transmembrane transport
B. dothidea	53_S186_L007_g9973.t1			hfid_439	CYP53				MFS_1		2.A.1	The_Major_Facilitator_Superfamily_(MFS)	_Electrochemical_Potential-driven_Transporters	2.A.1.14.11	retrograde regulation protein 2	C:integral component of membrane; F:transmembrane transporter activity; P:transmembrane transport
B. dothidea	53_S186_L007_g9988.t1			hfid_443	CYP53				MFS_1		2.A.1	The_Major_Facilitator_Superfamily_(MFS)	_Electrochemical_Potential-driven_Transporters	2.A.1.13.19	MFS monocarboxylate transporter, putative	C:membrane
B. dothidea	53_S186_L007_g312.t1		terpene	hfid_1454	CYP551				p450						Cytochrome P450 family protein	C:membrane; F:oxidoreductase activity; F:metal ion binding
B. dothidea	53_S186_L007_g11692.t1			hfid_447	CYP56				p450;MFS_1		2.A.1	The_Major_Facilitator_Superfamily_(MFS)	_Electrochemical_Potential-driven_Transporters	2.A.1.11.4	P450 family sporulation-specific N-formyltyrosine oxidase Dit2, putative	F:monooxygenase activity; F:iron ion binding; C:integral component of membrane; F:oxidoreductase activity, acting on paired donors, with incorporation or reduction of molecular oxygen; F:heme binding; P:oxidation-reduction process
B. dothidea	53_S186_L007_g4762.t1			hfid_447	CYP56				p450	SP(Sec/SPI)					Dit2 protein	F:monooxygenase activity; F:iron ion binding; C:membrane; F:oxidoreductase activity, acting on paired donors, with incorporation or reduction of molecular oxygen; F:heme binding; P:oxidation-reduction process
B. dothidea	53_S186_L007_g1389.t1			hfid_1468	CYP570				p450						cytochrome p450	P:metabolic process; F:oxidoreductase activity; F:metal ion binding
B. dothidea	53_S186_L007_g5741.t1			hfid_1474	CYP570				p450						putative cytochrome p450 protein	F:monooxygenase activity; F:iron ion binding; C:membrane; F:oxidoreductase activity, acting on paired donors, with incorporation or reduction of molecular oxygen; F:heme binding; P:oxidation-reduction process
B. dothidea	53_S186_L007_g7137.t1			hfid_1468	CYP570				p450						putative P450 monooxygenase	F:catalytic activity; F:binding
B. dothidea	53_S186_L007_g10248.t1			hfid_1484	CYP578				Mito_carr		2.A.29	The_Mitochondrial_Carrier_(MC)_Family	_Electrochemical_Potential-driven_Transporters	2.A.29.6.1	mitochondrial carrier	F:ATP transmembrane transporter activity; C:integral component of peroxisomal membrane; F:ADP transmembrane transporter activity; F:coenzyme A transmembrane transporter activity; F:FAD transmembrane transporter activity; P:ADP transport; P:ATP transport; P:coenzyme A transmembrane transport; P:FAD transmembrane transport; P:NAD transmembrane transport; F:FMN transmembrane transporter activity; F:…
B. dothidea	53_S186_L007_g10306.t1			hfid_1484	CYP578				Mito_carr		2.A.29	The_Mitochondrial_Carrier_(MC)_Family	_Electrochemical_Potential-driven_Transporters	2.A.29.16.1	mitochondrial thiamine pyrophosphate carrier 1	C:mitochondrion; C:integral component of membrane; F:transmembrane transporter activity; P:transmembrane transport
B. dothidea	53_S186_L007_g10954.t1			hfid_1484	CYP578				Mito_carr		2.A.29	The_Mitochondrial_Carrier_(MC)_Family	_Electrochemical_Potential-driven_Transporters	2.A.29.10.2	mitochondrial folate carrier protein Flx1	C:integral component of membrane; F:transmembrane transporter activity; P:transmembrane transport
B. dothidea	53_S186_L007_g11033.t1			hfid_1484	CYP578				Mito_carr		2.A.29	The_Mitochondrial_Carrier_(MC)_Family	_Electrochemical_Potential-driven_Transporters	2.A.29.5.6	solute carrier family 25 member 38	C:mitochondrion; C:membrane; F:transmembrane transporter activity
B. dothidea	53_S186_L007_g1383.t1			hfid_1484	CYP578				Mito_carr		2.A.29	The_Mitochondrial_Carrier_(MC)_Family	_Electrochemical_Potential-driven_Transporters	2.A.29.23.9	mitochondrial carrier	C:integral component of membrane; F:transmembrane transporter activity; P:transmembrane transport
B. dothidea	53_S186_L007_g1908.t1			hfid_1484	CYP578				Mito_carr		2.A.29	The_Mitochondrial_Carrier_(MC)_Family	_Electrochemical_Potential-driven_Transporters	2.A.29.18.1	mitochondrial carrier	F:S-adenosyl-L-methionine transmembrane transporter activity; C:mitochondrial inner membrane; C:integral component of membrane; P:S-adenosyl-L-methionine transmembrane transport
B. dothidea	53_S186_L007_g1920.t1			hfid_1484	CYP578				Mito_carr		2.A.29	The_Mitochondrial_Carrier_(MC)_Family	_Electrochemical_Potential-driven_Transporters	2.A.29.2.5	mitochondrial carrier	C:mitochondrial inner membrane; C:integral component of membrane; F:transmembrane transporter activity; P:transmembrane transport
B. dothidea	53_S186_L007_g2077.t1			hfid_1484	CYP578				Mito_carr		2.A.29	The_Mitochondrial_Carrier_(MC)_Family	_Electrochemical_Potential-driven_Transporters	2.A.29.14.8	mitochondrial carrier	C:integral component of membrane; F:transmembrane transporter activity; P:transmembrane transport
B. dothidea	53_S186_L007_g2103.t1			hfid_1484	CYP578				Mito_carr		2.A.29	The_Mitochondrial_Carrier_(MC)_Family	_Electrochemical_Potential-driven_Transporters	2.A.29.15.1	mitochondrial carrier	P:mitochondrial transport; C:integral component of membrane; F:transmembrane transporter activity; C:mitochondrial membrane; P:transmembrane transport
B. dothidea	53_S186_L007_g219.t1			hfid_1484	CYP578				Mito_carr		2.A.29	The_Mitochondrial_Carrier_(MC)_Family	_Electrochemical_Potential-driven_Transporters	2.A.29.8.16	mitochondrial carrier	C:integral component of membrane; F:transmembrane transporter activity; P:transmembrane transport
B. dothidea	53_S186_L007_g2267.t1			hfid_1484	CYP578				Mito_carr		2.A.29	The_Mitochondrial_Carrier_(MC)_Family	_Electrochemical_Potential-driven_Transporters	2.A.29.4.4	phosphate carrier protein 2	F:inorganic phosphate transmembrane transporter activity; F:copper ion transmembrane transporter activity; P:cellular copper ion homeostasis; C:integral component of mitochondrial inner membrane; P:copper ion transmembrane transport; P:phosphate ion transmembrane transport
B. dothidea	53_S186_L007_g2347.t1			hfid_1484	CYP578				Mito_carr		2.A.29	The_Mitochondrial_Carrier_(MC)_Family	_Electrochemical_Potential-driven_Transporters	2.A.29.13.1	mitochondrial uncoupling protein 2	P:fumarate transport; P:succinate transport; C:integral component of membrane; F:transmembrane transporter activity; P:transmembrane transport
B. dothidea	53_S186_L007_g242.t1			hfid_1484	CYP578				Mito_carr		2.A.29	The_Mitochondrial_Carrier_(MC)_Family	_Electrochemical_Potential-driven_Transporters	2.A.29.10.5	mitochondrial folate transporter/carrier	C:integral component of membrane; F:transmembrane transporter activity; P:transmembrane transport
B. dothidea	53_S186_L007_g2580.t1			hfid_1484	CYP578				Mito_carr		2.A.29	The_Mitochondrial_Carrier_(MC)_Family	_Electrochemical_Potential-driven_Transporters	2.A.29.9.1	amino acid transporter arg-13	F:L-ornithine transmembrane transporter activity; F:ATP:ADP antiporter activity; P:purine ribonucleotide transport; C:integral component of membrane; P:adenine nucleotide transport; P:mitochondrial L-ornithine transmembrane transport
B. dothidea	53_S186_L007_g2869.t1			hfid_1484	CYP578				Mito_carr		2.A.29	The_Mitochondrial_Carrier_(MC)_Family	_Electrochemical_Potential-driven_Transporters	2.A.29.1.7	ADP/ATP carrier protein	F:ATP:ADP antiporter activity; C:mitochondrial inner membrane; C:integral component of membrane; P:mitochondrial ADP transmembrane transport; P:mitochondrial ATP transmembrane transport
B. dothidea	53_S186_L007_g3226.t1			hfid_1484	CYP578				Mito_carr		2.A.29	The_Mitochondrial_Carrier_(MC)_Family	_Electrochemical_Potential-driven_Transporters	2.A.29.8.4	solute carrier family 25, member 46	F:carnitine:acyl carnitine antiporter activity; C:mitochondrial inner membrane; P:fatty acid metabolic process; C:integral component of membrane; P:transmembrane transport
B. dothidea	53_S186_L007_g3728.t1			hfid_1484	CYP578				Mito_carr		2.A.29	The_Mitochondrial_Carrier_(MC)_Family	_Electrochemical_Potential-driven_Transporters	2.A.29.2.3	Mitochondrial carrier	P:mitochondrial transport; F:sulfate transmembrane transporter activity; F:thiosulfate transmembrane transporter activity; F:oxaloacetate transmembrane transporter activity; F:malate transmembrane transporter activity; F:succinate transmembrane transporter activity; F:antiporter activity; P:thiosulfate transport; C:integral component of membrane; C:mitochondrial membrane; P:phosphate ion transmem…
B. dothidea	53_S186_L007_g3977.t1			hfid_1484	CYP578				Mito_carr		2.A.29	The_Mitochondrial_Carrier_(MC)_Family	_Electrochemical_Potential-driven_Transporters	2.A.29.5.1	mitochondrial RNA splicing protein	F:nucleic acid binding; F:asparagine-tRNA ligase activity; F:iron ion transmembrane transporter activity; F:ATP binding; P:asparaginyl-tRNA aminoacylation; C:integral component of membrane; P:iron import into the mitochondrion
B. dothidea	53_S186_L007_g4829.t1			hfid_1484	CYP578				Mito_carr;EF-hand_7		2.A.29	The_Mitochondrial_Carrier_(MC)_Family	_Electrochemical_Potential-driven_Transporters	2.A.29.23.2	mitochondrial carrier	F:calcium ion binding; C:integral component of membrane; F:transmembrane transporter activity; P:transmembrane transport
B. dothidea	53_S186_L007_g4952.t1			hfid_1484	CYP578				Mito_carr		2.A.29	The_Mitochondrial_Carrier_(MC)_Family	_Electrochemical_Potential-driven_Transporters	2.A.29.18.3	mitochondrial carrier	C:integral component of membrane; F:transmembrane transporter activity; P:transmembrane transport
B. dothidea	53_S186_L007_g6395.t1			hfid_1484	CYP578				Mito_carr;EF-hand_7		2.A.29	The_Mitochondrial_Carrier_(MC)_Family	_Electrochemical_Potential-driven_Transporters	2.A.29.14.10	mitochondrial carrier protein	F:L-glutamate transmembrane transporter activity; F:calcium ion binding; F:L-aspartate transmembrane transporter activity; P:aspartate transmembrane transport; P:L-glutamate transmembrane transport; C:integral component of membrane; P:malate-aspartate shuttle; P:L-aspartate transmembrane transport
B. dothidea	53_S186_L007_g7710.t1			hfid_1484	CYP578				ADH_zinc_N;Mito_carr;ADH_N		2.A.29	The_Mitochondrial_Carrier_(MC)_Family	_Electrochemical_Potential-driven_Transporters	2.A.29.18.6	alcohol dehydrogenase	F:zinc ion binding; F:oxidoreductase activity; P:oxidation-reduction process
B. dothidea	53_S186_L007_g8727.t1			hfid_1484	CYP578				Mito_carr		2.A.29	The_Mitochondrial_Carrier_(MC)_Family	_Electrochemical_Potential-driven_Transporters	2.A.29.8.5	mitochondrial carnitine/acylcarnitine carrier protein	C:integral component of membrane; F:transmembrane transporter activity; P:transmembrane transport
B. dothidea	53_S186_L007_g8960.t1			hfid_1484	CYP578				Mito_carr		2.A.29	The_Mitochondrial_Carrier_(MC)_Family	_Electrochemical_Potential-driven_Transporters	2.A.29.13.1	Succinate/fumarate mitochondrial transporter	P:succinate transport
B. dothidea	53_S186_L007_g9211.t1			hfid_1484	CYP578				Mito_carr		2.A.29	The_Mitochondrial_Carrier_(MC)_Family	_Electrochemical_Potential-driven_Transporters	2.A.29.4.3	mitochondrial carrier	C:integral component of membrane; F:transmembrane transporter activity; P:transmembrane transport
B. dothidea	53_S186_L007_g9456.t1			hfid_1484	CYP578				Mito_carr;SAICAR_synt		2.A.29	The_Mitochondrial_Carrier_(MC)_Family	_Electrochemical_Potential-driven_Transporters	2.A.29.10.4	mitochondrial carrier	F:phosphoribosylaminoimidazolesuccinocarboxamide synthase activity; P:purine nucleotide biosynthetic process; C:integral component of membrane; F:transmembrane transporter activity; P:transmembrane transport
B. dothidea	53_S186_L007_g9607.t1			hfid_1484	CYP578				Mito_carr		2.A.29	The_Mitochondrial_Carrier_(MC)_Family	_Electrochemical_Potential-driven_Transporters	2.A.29.7.3	mitochondrial carrier	C:integral component of membrane; F:transmembrane transporter activity; P:transmembrane transport
B. dothidea	53_S186_L007_g10217.t1			hfid_453	CYP58				p450;Zn_clus						cytochrome P450 oxidoreductase	F:binding; F:oxidoreductase activity
B. dothidea	53_S186_L007_g10357.t1			hfid_480	CYP58				p450						putative cytochrome p450 protein	F:monooxygenase activity; F:iron ion binding; C:integral component of membrane; F:oxidoreductase activity, acting on paired donors, with incorporation or reduction of molecular oxygen; F:heme binding; P:oxidation-reduction process
B. dothidea	53_S186_L007_g11284.t1	Yanuthone_D	T1PKS	hfid_456	CYP58				p450						cytochrome P450	F:monooxygenase activity; F:iron ion binding; C:integral component of membrane; F:oxidoreductase activity, acting on paired donors, with incorporation or reduction of molecular oxygen; F:heme binding; P:oxidation-reduction process
B. dothidea	53_S186_L007_g11561.t1			hfid_469	CYP58										integral membrane protein	C:integral component of membrane
B. dothidea	53_S186_L007_g1161.t1			hfid_453	CYP58				p450						cytochrome P450 oxidoreductase	F:binding; F:oxidoreductase activity
B. dothidea	53_S186_L007_g12143.t1			hfid_477	CYP58				p450	SP(Sec/SPI)					benzoate 4-monooxygenase cytochrome p450	F:monooxygenase activity; F:iron ion binding; C:membrane; C:integral component of membrane; F:oxidoreductase activity; F:oxidoreductase activity, acting on paired donors, with incorporation or reduction of molecular oxygen; F:heme binding; F:metal ion binding; P:oxidation-reduction process
B. dothidea	53_S186_L007_g1234.t1			hfid_458	CYP58										predicted protein	C:integral component of membrane
B. dothidea	53_S186_L007_g2363.t1			hfid_481	CYP58				p450						putative P450 monooxygenase	F:binding; F:oxidoreductase activity
B. dothidea	53_S186_L007_g4621.t1			hfid_480	CYP58				p450						cytochrome p450	F:monooxygenase activity; F:iron ion binding; F:oxidoreductase activity, acting on paired donors, with incorporation or reduction of molecular oxygen; F:heme binding; P:oxidation-reduction process
B. dothidea	53_S186_L007_g5249.t1			hfid_475	CYP58				p450						Cytochrome P450	F:binding; F:oxidoreductase activity
B. dothidea	53_S186_L007_g5556.t1			hfid_480	CYP58				p450						cytochrome p450	F:monooxygenase activity; F:iron ion binding; C:membrane; C:integral component of membrane; F:oxidoreductase activity; F:oxidoreductase activity, acting on paired donors, with incorporation or reduction of molecular oxygen; F:heme binding; F:metal ion binding; P:oxidation-reduction process
B. dothidea	53_S186_L007_g5941.t1			hfid_469	CYP58										integral membrane protein	C:integral component of membrane
B. dothidea	53_S186_L007_g6313.t1			hfid_458	CYP58										hypothetical protein UCRNP2_5349
B. dothidea	53_S186_L007_g6445.t1			hfid_475	CYP58				p450						Cytochrome P450	F:iron ion binding; F:oxidoreductase activity, acting on paired donors, with incorporation or reduction of molecular oxygen; F:heme binding; P:oxidation-reduction process
B. dothidea	53_S186_L007_g6530.t1			hfid_469	CYP58										integral membrane protein	C:membrane
B. dothidea	53_S186_L007_g6559.t1		NRPS-like	hfid_453	CYP58				p450						cytochrome P450 monooxygenase-like protein	C:membrane; F:oxidoreductase activity; F:metal ion binding
B. dothidea	53_S186_L007_g6739.t1	Brefeldin	T1PKS	hfid_463	CYP58				p450						cytochrome P450	F:oxidoreductase activity; F:metal ion binding
B. dothidea	53_S186_L007_g8070.t1	PR	T1PKS|NRPS|terpene	hfid_480	CYP58				p450						cytochrome P450 oxidoreductase	C:membrane; F:oxidoreductase activity; F:metal ion binding
B. dothidea	53_S186_L007_g8973.t1			hfid_480	CYP58				p450						cytochrome P450	F:monooxygenase activity; F:iron ion binding; C:membrane; C:integral component of membrane; F:oxidoreductase activity; F:oxidoreductase activity, acting on paired donors, with incorporation or reduction of molecular oxygen; F:heme binding; F:metal ion binding; P:oxidation-reduction process
B. dothidea	53_S186_L007_g9320.t1	Harzianum_B	terpene	hfid_452	CYP58				p450						trichodiene oxygenase	F:monooxygenase activity; F:iron ion binding; C:integral component of membrane; F:oxidoreductase activity, acting on paired donors, with incorporation or reduction of molecular oxygen; F:heme binding; P:oxidation-reduction process
B. dothidea	53_S186_L007_g6049.t1	Aspirochlorine	NRPS	hfid_211	CYP6				p450						cytochrome P450	F:binding; F:oxidoreductase activity
B. dothidea	53_S186_L007_g6170.t1			hfid_211	CYP6				p450						cytochrome P450	F:oxidoreductase activity; F:metal ion binding
B. dothidea	53_S186_L007_g8421.t1			hfid_211	CYP6				p450						isotrichodermin C-15 hydroxylase	F:iron ion binding; C:integral component of membrane; F:benzoate 4-monooxygenase activity; F:heme binding; P:oxidation-reduction process
B. dothidea	53_S186_L007_g9230.t1		NRPS-like	hfid_485	CYP61				p450						cytochrome P450 61	F:C-22 sterol desaturase activity; F:monooxygenase activity; F:iron ion binding; P:ergosterol biosynthetic process; C:integral component of membrane; F:heme binding; P:oxidation-reduction process
B. dothidea	53_S186_L007_g2811.t1			hfid_1554	CYP623				p450						cytochrome P450	F:oxidoreductase activity; F:metal ion binding
B. dothidea	53_S186_L007_g3194.t1			hfid_1554	CYP623				p450						cytochrome P450	F:monooxygenase activity; F:iron ion binding; C:membrane; C:integral component of membrane; F:oxidoreductase activity; F:oxidoreductase activity, acting on paired donors, with incorporation or reduction of molecular oxygen; F:heme binding; F:metal ion binding; P:oxidation-reduction process
B. dothidea	53_S186_L007_g5688.t1			hfid_1554	CYP623				p450						cytochrome P450	F:monooxygenase activity; F:iron ion binding; F:oxidoreductase activity, acting on paired donors, with incorporation or reduction of molecular oxygen; F:heme binding; P:oxidation-reduction process
B. dothidea	53_S186_L007_g11315.t1			hfid_1559	CYP645				RRP7						putative meiotic recombination protein dmc1 protein	F:nucleic acid binding
B. dothidea	53_S186_L007_g4085.t1			hfid_1559	CYP645				Fer2;MOSC;3-alpha		5.B.1	The_Phagocyte_(gp91<sup>phox</sup>)_NADPH_Oxidase_Family	_Transmembrane_Electron_Carriers	5.B.1.3.1	MOSC domain-containing protein	F:methyltransferase activity; F:oxidoreductase activity; F:molybdenum ion binding; F:pyridoxal phosphate binding; P:methylation; P:oxidation-reduction process
B. dothidea	53_S186_L007_g7066.t1			hfid_1559	CYP645				Globin;NAD_binding_1;FAD_binding_6		3.D.5	The_Na<sup>+</sup>-translocating_NADH:Quinone_Dehydrogenase_(Na-NDH_or_NQR)_Family	_Primary_Active_Transporters	3.D.5.1.1	nitric oxide dioxygenase	C:cytosol; F:nitric oxide dioxygenase activity; C:membrane; F:oxygen binding; F:heme binding; F:riboflavin reductase (NADPH) activity; P:negative regulation of sexual sporulation resulting in formation of a cellular spore; P:sterigmatocystin biosynthetic process; P:nitric oxide catabolic process; P:oxidation-reduction process; P:cellular response to nitrosative stress; F:FAD binding
B. dothidea	53_S186_L007_g10163.t1	Leucinostatins	T1PKS|NRPS	hfid_492	CYP65				p450						putative cytochrome p450 protein	F:oxidoreductase activity; F:metal ion binding
B. dothidea	53_S186_L007_g11620.t1			hfid_492	CYP65				p450						putative cytochrome p450 protein	F:iron ion binding; F:oxidoreductase activity, acting on paired donors, with incorporation or reduction of molecular oxygen; F:heme binding; P:oxidation-reduction process
B. dothidea	53_S186_L007_g12292.t1			hfid_491	CYP65					SP(Sec/SPI)					putative cytochrome p450 protein	F:catalytic activity
B. dothidea	53_S186_L007_g1629.t1			hfid_499	CYP65				p450;ADC	SP(Sec/SPI)					putative cytochrome p450 protein	F:iron ion binding; C:integral component of membrane; F:oxidoreductase activity, acting on paired donors, with incorporation or reduction of molecular oxygen; F:heme binding; P:oxidation-reduction process
B. dothidea	53_S186_L007_g2225.t1			hfid_499	CYP65				p450	SP(Sec/SPI)					putative cytochrome p450 protein	C:membrane; F:oxidoreductase activity; F:metal ion binding
B. dothidea	53_S186_L007_g3393.t1			hfid_515	CYP65				p450						cytochrome P450	C:membrane; F:oxidoreductase activity; F:metal ion binding
B. dothidea	53_S186_L007_g72.t1			hfid_500	CYP65				p450						putative cytochrome p450 monooxygenase pc-bph protein	F:monooxygenase activity; F:iron ion binding; C:integral component of membrane; F:oxidoreductase activity, acting on paired donors, with incorporation or reduction of molecular oxygen; F:heme binding; P:oxidation-reduction process
B. dothidea	53_S186_L007_g8034.t1			hfid_497	CYP65				p450						benzoate 4-monooxygenase cytochrome P450	F:monooxygenase activity; F:iron ion binding; C:integral component of membrane; F:oxidoreductase activity, acting on paired donors, with incorporation or reduction of molecular oxygen; F:heme binding; P:oxidation-reduction process
B. dothidea	53_S186_L007_g8072.t1	PR	T1PKS|NRPS|terpene	hfid_500	CYP65				p450						benzoate 4-monooxygenase cytochrome P450	F:monooxygenase activity; F:iron ion binding; C:integral component of membrane; F:oxidoreductase activity, acting on paired donors, with incorporation or reduction of molecular oxygen; F:heme binding; P:oxidation-reduction process
B. dothidea	53_S186_L007_g8082.t1	PR	T1PKS|NRPS|terpene	hfid_504	CYP65				p450						benzoate 4-monooxygenase cytochrome P450	F:monooxygenase activity; F:iron ion binding; C:integral component of membrane; F:oxidoreductase activity, acting on paired donors, with incorporation or reduction of molecular oxygen; F:heme binding; P:oxidation-reduction process
B. dothidea	53_S186_L007_g10437.t1			hfid_519	CYP68				p450						putative cytochrome p450 protein	P:steroid metabolic process; C:membrane; F:oxidoreductase activity; F:metal ion binding; F:organic cyclic compound binding; F:heterocyclic compound binding
B. dothidea	53_S186_L007_g10537.t1			hfid_518	CYP68				p450						putative cytochrome p450 protein	F:monooxygenase activity; F:iron ion binding; F:oxidoreductase activity, acting on paired donors, with incorporation or reduction of molecular oxygen; F:heme binding; P:oxidation-reduction process
B. dothidea	53_S186_L007_g1067.t1			hfid_518	CYP68				p450						ent-kaurene oxidase	F:monooxygenase activity; F:iron ion binding; C:membrane; C:integral component of membrane; F:oxidoreductase activity; F:oxidoreductase activity, acting on paired donors, with incorporation or reduction of molecular oxygen; F:heme binding; F:metal ion binding; P:oxidation-reduction process
B. dothidea	53_S186_L007_g10941.t1			hfid_519	CYP68				p450						putative cytochrome p450 protein	F:monooxygenase activity; F:iron ion binding; F:oxidoreductase activity, acting on paired donors, with incorporation or reduction of molecular oxygen; F:heme binding; P:oxidation-reduction process
B. dothidea	53_S186_L007_g11539.t1			hfid_519	CYP68				p450						putative cytochrome p450 protein	F:oxidoreductase activity; F:ion binding
B. dothidea	53_S186_L007_g11856.t1			hfid_519	CYP68	GH115			p450;Glyco_hydro_115						Immunoglobulin I-set domain-containing protein	P:regulation of translation; F:hydrolase activity; C:CCR4-NOT core complex
B. dothidea	53_S186_L007_g11958.t1			hfid_518	CYP68				p450						cytochrome P450	F:monooxygenase activity; F:iron ion binding; P:steroid metabolic process; C:membrane; F:oxidoreductase activity, acting on paired donors, with incorporation or reduction of molecular oxygen; F:heme binding; P:oxidation-reduction process
B. dothidea	53_S186_L007_g12328.t1			hfid_522	CYP68				p450						Cytochrome P450	C:membrane; F:oxidoreductase activity; F:metal ion binding
B. dothidea	53_S186_L007_g1988.t1			hfid_519	CYP68				p450						cytochrome p450	F:monooxygenase activity; F:iron ion binding; P:steroid metabolic process; F:oxidoreductase activity, acting on paired donors, with incorporation or reduction of molecular oxygen; F:heme binding; P:oxidation-reduction process
B. dothidea	53_S186_L007_g2070.t1			hfid_519	CYP68				p450						putative cytochrome p450 protein	P:steroid metabolic process; F:oxidoreductase activity; F:metal ion binding; F:organic cyclic compound binding; F:heterocyclic compound binding
B. dothidea	53_S186_L007_g3392.t1			hfid_521	CYP68				p450						cytochrome p450	C:membrane; F:oxidoreductase activity; F:metal ion binding
B. dothidea	53_S186_L007_g3520.t1			hfid_521	CYP68				p450						Cytochrome P450	F:binding; F:oxidoreductase activity
B. dothidea	53_S186_L007_g3892.t1			hfid_518	CYP68				p450						Cytochrome P450	F:binding; P:steroid metabolic process; F:oxidoreductase activity
B. dothidea	53_S186_L007_g4577.t1	Brefeldin	T1PKS|NRPS	hfid_519	CYP68				p450						ankyrin repeat domain protein, putative	F:monooxygenase activity; F:iron ion binding; F:oxidoreductase activity, acting on paired donors, with incorporation or reduction of molecular oxygen; F:heme binding; P:oxidation-reduction process
B. dothidea	53_S186_L007_g4841.t1			hfid_519	CYP68				p450						putative cytochrome p450 protein	F:monooxygenase activity; F:iron ion binding; P:steroid metabolic process; C:integral component of membrane; F:oxidoreductase activity, acting on paired donors, with incorporation or reduction of molecular oxygen; F:heme binding; P:oxidation-reduction process
B. dothidea	53_S186_L007_g5504.t1			hfid_518	CYP68				p450						ent-kaurene oxidase	C:membrane; F:oxidoreductase activity; F:metal ion binding
B. dothidea	53_S186_L007_g5533.t1			hfid_519	CYP68				p450						putative cytochrome p450 protein	F:monooxygenase activity; F:iron ion binding; F:ATP binding; P:steroid metabolic process; C:integral component of membrane; F:oxidoreductase activity, acting on paired donors, with incorporation or reduction of molecular oxygen; F:heme binding; P:oxidation-reduction process
B. dothidea	53_S186_L007_g6073.t1			hfid_522	CYP68				p450						cytochrome P450 monooxygenase, putative	F:monooxygenase activity; F:iron ion binding; C:cellular_component; C:membrane; C:integral component of membrane; P:terpenoid biosynthetic process; F:oxidoreductase activity; F:oxidoreductase activity, acting on paired donors, with incorporation or reduction of molecular oxygen; F:heme binding; F:metal ion binding; P:oxidation-reduction process
B. dothidea	53_S186_L007_g679.t1			hfid_518	CYP68				p450						cytochrome P450	P:metabolic process; C:membrane; F:oxidoreductase activity; F:metal ion binding
B. dothidea	53_S186_L007_g7220.t1			hfid_519	CYP68				p450						putative cytochrome p450 protein	F:monooxygenase activity; F:iron ion binding; P:steroid metabolic process; C:integral component of membrane; F:oxidoreductase activity, acting on paired donors, with incorporation or reduction of molecular oxygen; F:heme binding; P:oxidation-reduction process
B. dothidea	53_S186_L007_g7473.t1			hfid_521	CYP68				p450						putative cytochrome p450 protein	F:binding; F:oxidoreductase activity
B. dothidea	53_S186_L007_g8167.t1		NRPS	hfid_519	CYP68				p450						putative cytochrome p450 protein	F:binding; F:oxidoreductase activity
B. dothidea	53_S186_L007_g8261.t1			hfid_519	CYP68				p450						putative cytochrome p450 protein	F:monooxygenase activity; F:iron ion binding; P:steroid metabolic process; C:membrane; F:oxidoreductase activity, acting on paired donors, with incorporation or reduction of molecular oxygen; F:heme binding; P:oxidation-reduction process
B. dothidea	53_S186_L007_g10449.t1			hfid_1572	CYP684				p450						cytochrome P450	F:monooxygenase activity; F:iron ion binding; F:oxidoreductase activity, acting on paired donors, with incorporation or reduction of molecular oxygen; F:heme binding; P:oxidation-reduction process
B. dothidea	53_S186_L007_g10841.t1			hfid_1572	CYP684				p450						cytochrome P450	F:binding; F:oxidoreductase activity
B. dothidea	53_S186_L007_g1545.t1			hfid_1572	CYP684										hypothetical protein UCRNP2_5853
B. dothidea	53_S186_L007_g1854.t1			hfid_1572	CYP684				p450						cytochrome P450 monooxygenase	F:binding; F:oxidoreductase activity
B. dothidea	53_S186_L007_g4145.t1			hfid_1572	CYP684				p450	SP(Sec/SPI)					cytochrome p450	F:oxidoreductase activity; F:metal ion binding
B. dothidea	53_S186_L007_g5296.t1			hfid_1572	CYP684				p450						cytochrome p450	C:membrane; F:oxidoreductase activity; F:metal ion binding
B. dothidea	53_S186_L007_g6166.t1			hfid_1577	CYP684				p450						cytochrome P450, putative	F:monooxygenase activity; F:iron ion binding; C:cellular_component; C:membrane; C:integral component of membrane; F:oxidoreductase activity; F:oxidoreductase activity, acting on paired donors, with incorporation or reduction of molecular oxygen; F:heme binding; F:metal ion binding; P:oxidation-reduction process
B. dothidea	53_S186_L007_g6191.t1			hfid_1574	CYP684				p450						Versicolorin B desaturase	F:monooxygenase activity; F:iron ion binding; C:membrane; F:oxidoreductase activity, acting on paired donors, with incorporation or reduction of molecular oxygen; F:heme binding; P:oxidation-reduction process
B. dothidea	53_S186_L007_g6989.t1			hfid_1572	CYP684				p450						cytochrome P450	F:monooxygenase activity; F:iron ion binding; C:cellular_component; C:membrane; C:integral component of membrane; F:oxidoreductase activity; F:oxidoreductase activity, acting on paired donors, with incorporation or reduction of molecular oxygen; F:heme binding; F:metal ion binding; P:oxidation-reduction process
B. dothidea	53_S186_L007_g7163.t1			hfid_1572	CYP684										predicted protein
B. dothidea	53_S186_L007_g7403.t1			hfid_1575	CYP684				p450						cytochrome P450	F:monooxygenase activity; F:iron ion binding; C:membrane; F:oxidoreductase activity, acting on paired donors, with incorporation or reduction of molecular oxygen; F:heme binding; P:oxidation-reduction process
B. dothidea	53_S186_L007_g8379.t1			hfid_1572	CYP684				p450						cytochrome P450	F:binding; F:oxidoreductase activity
B. dothidea	53_S186_L007_g9076.t1			hfid_1572	CYP684				p450						cytochrome P450	F:oxidoreductase activity; F:metal ion binding
B. dothidea	53_S186_L007_g8278.t1			hfid_256	CYP7										cytochrome P450 monooxygenase	F:iron ion binding; C:integral component of membrane; F:oxidoreductase activity, acting on paired donors, with incorporation or reduction of molecular oxygen; F:heme binding; P:oxidation-reduction process
B. dothidea	53_S186_L007_g9854.t1			hfid_256	CYP7				p450						Cytochrome P450	F:monooxygenase activity; F:iron ion binding; C:integral component of membrane; F:oxidoreductase activity, acting on paired donors, with incorporation or reduction of molecular oxygen; F:heme binding; P:oxidation-reduction process
B. dothidea	53_S186_L007_g9551.t1			hfid_1581	CYP703										hypothetical protein UCRNP2_6045
B. dothidea	53_S186_L007_g3485.t1			hfid_1587	CYP705	GH152|GH2	GH152|GH2		Thaumatin;Glyco_hydro_2	SP(Sec/SPI)					glycoside hydrolase family 2 protein	F:beta-mannosidase activity; C:lysosome; P:glycoprotein catabolic process; P:mannan catabolic process
B. dothidea	53_S186_L007_g10224.t1		NRPS-like	hfid_1590	CYP706				FAD_binding_4						FAD binding domain-containing protein	F:flavin adenine dinucleotide binding
B. dothidea	53_S186_L007_g10226.t1		NRPS-like	hfid_1590	CYP706				FAD_binding_4;BBE	SP(Sec/SPI)					FAD binding domain protein	F:oxidoreductase activity; P:oxidation-reduction process; F:FAD binding
B. dothidea	53_S186_L007_g10630.t1			hfid_1590	CYP706				FAD_binding_4;SnoaL_2						oxidoreductase, FAD-binding protein	F:catalytic activity; F:flavin adenine dinucleotide binding
B. dothidea	53_S186_L007_g10696.t1			hfid_1590	CYP706				FAD_binding_4	SP(Sec/SPI)					putative fad binding domain-containing protein	F:oxidoreductase activity; P:oxidation-reduction process; F:FAD binding
B. dothidea	53_S186_L007_g10903.t1			hfid_1590	CYP706				FAD_binding_4;BBE	SP(Sec/SPI)					isoamyl alcohol oxidase	F:oxidoreductase activity; P:oxidation-reduction process; F:FAD binding
B. dothidea	53_S186_L007_g11113.t1			hfid_1590	CYP706				FAD_binding_4						putative fad binding domain containing protein	F:oxidoreductase activity; F:flavin adenine dinucleotide binding; P:oxidation-reduction process; F:FAD binding
B. dothidea	53_S186_L007_g11290.t1			hfid_1590	CYP706				FAD_binding_4	SP(Sec/SPI)					FAD-binding domain-containing protein	F:oxidoreductase activity; P:oxidation-reduction process; F:FAD binding
B. dothidea	53_S186_L007_g11324.t1			hfid_1590	CYP706				FAD_binding_4	SP(Sec/SPI)					putative fad binding domain containing protein	F:oxidoreductase activity; P:oxidation-reduction process; F:FAD binding
B. dothidea	53_S186_L007_g11634.t1			hfid_1590	CYP706				FAD_binding_4;BBE						isoamyl alcohol oxidase	F:oxidoreductase activity; P:oxidation-reduction process; F:FAD binding
B. dothidea	53_S186_L007_g11671.t1			hfid_1590	CYP706				FAD_binding_4;BBE						FAD binding domain-containing protein	F:oxidoreductase activity; F:flavin adenine dinucleotide binding; P:oxidation-reduction process; F:FAD binding
B. dothidea	53_S186_L007_g11876.t1			hfid_1590	CYP706				FAD_binding_4	SP(Sec/SPI)					putative fad binding domain containing protein	C:extracellular region
B. dothidea	53_S186_L007_g12013.t1			hfid_1590	CYP706				FAD_binding_4						putative fad binding domain containing protein	F:oxidoreductase activity; P:oxidation-reduction process; F:FAD binding
B. dothidea	53_S186_L007_g12397.t1			hfid_1590	CYP706	AA7	AA7		FAD_binding_4;BBE	SP(Sec/SPI)					FAD-binding domain-containing protein	F:flavin adenine dinucleotide binding
B. dothidea	53_S186_L007_g1399.t1			hfid_1590	CYP706	AA7	AA7		FAD_binding_4;BBE	SP(Sec/SPI)					FAD binding domain-containing protein	F:oxidoreductase activity; P:oxidation-reduction process; F:FAD binding
B. dothidea	53_S186_L007_g1943.t1			hfid_1590	CYP706				FAD_binding_4;BBE	SP(Sec/SPI)					FAD binding domain protein	C:extracellular region; F:oxidoreductase activity; P:oxidation-reduction process; F:FAD binding
B. dothidea	53_S186_L007_g2009.t1			hfid_1590	CYP706	AA7	AA7		Chitin_bind_1;FAD_binding_4;BBE	SP(Sec/SPI)	9.B.87	The_Selenoprotein_P_Receptor_(SelP-Receptor)_Family	_Incompletely_Characterized_Transport_Systems	9.B.87.1.15	FAD-binding domain-containing protein	F:chitin binding; F:oxidoreductase activity; P:oxidation-reduction process; F:FAD binding
B. dothidea	53_S186_L007_g2561.t1			hfid_1590	CYP706				Aldedh;FAD_binding_4;BBE						putative fad binding domain protein	F:oxidoreductase activity, acting on the aldehyde or oxo group of donors, NAD or NADP as acceptor; F:flavin adenine dinucleotide binding; P:oxidation-reduction process
B. dothidea	53_S186_L007_g2914.t1			hfid_1590	CYP706	AA7	AA7		FAD_binding_4	SP(Sec/SPI)					FAD binding domain protein	F:oxidoreductase activity; P:oxidation-reduction process; F:FAD binding
B. dothidea	53_S186_L007_g3502.t1	Alternapyrone	T1PKS	hfid_1590	CYP706				FAD_binding_4	SP(Sec/SPI)					FAD binding domain-containing protein	F:oxidoreductase activity; P:oxidation-reduction process; F:FAD binding
B. dothidea	53_S186_L007_g3561.t1			hfid_1590	CYP706				FAD_binding_4;BBE						FAD/FMN-containing isoamyl alcohol oxidase MreA	F:oxidoreductase activity; P:oxidation-reduction process; F:FAD binding
B. dothidea	53_S186_L007_g3598.t1			hfid_1590	CYP706				FAD_binding_4;BBE						FAD binding domain protein	C:integral component of membrane; F:oxidoreductase activity; P:oxidation-reduction process; F:FAD binding
B. dothidea	53_S186_L007_g3816.t1			hfid_1590	CYP706				FAD_binding_4						FAD binding domain protein	F:oxidoreductase activity; P:oxidation-reduction process; F:FAD binding
B. dothidea	53_S186_L007_g3951.t1			hfid_1590	CYP706				Abhydrolase_1;FAD_binding_4;Abhydrolase_4	SP(Sec/SPI)					FAD binding domain-containing protein	F:flavin adenine dinucleotide binding
B. dothidea	53_S186_L007_g49.t1			hfid_1590	CYP706				FAD_binding_4;BBE	SP(Sec/SPI)					FAD-dependent monooxygenase	F:monooxygenase activity; C:cellular_component; F:oxidoreductase activity; F:flavin adenine dinucleotide binding; P:oxidation-reduction process; F:FAD binding
B. dothidea	53_S186_L007_g5341.t1			hfid_1590	CYP706	AA7			FAD_binding_4;BBE						FAD-binding domain-containing protein	F:oxidoreductase activity; P:oxidation-reduction process; F:FAD binding
B. dothidea	53_S186_L007_g5414.t1	Patulin	T1PKS	hfid_1590	CYP706				FAD_binding_4;BBE						FAD binding domain protein	F:oxidoreductase activity; P:oxidation-reduction process; F:FAD binding
B. dothidea	53_S186_L007_g5869.t1			hfid_1590	CYP706				FAD_binding_4;BBE						FAD-binding domain-containing protein	F:catalytic activity
B. dothidea	53_S186_L007_g6123.t1		T1PKS	hfid_1590	CYP706				FAD_binding_4	SP(Sec/SPI)					putative fad binding domain containing protein	F:catalytic activity; F:oxidoreductase activity; F:flavin adenine dinucleotide binding; P:oxidation-reduction process; F:FAD binding
B. dothidea	53_S186_L007_g636.t1			hfid_1590	CYP706				FAD_binding_4	SP(Sec/SPI)					FAD binding domain-containing protein	F:oxidoreductase activity; P:oxidation-reduction process; F:FAD binding
B. dothidea	53_S186_L007_g6803.t1			hfid_1590	CYP706				FAD_binding_4	SP(Sec/SPI)					FAD binding domain-containing protein	F:oxidoreductase activity; P:oxidation-reduction process; F:FAD binding
B. dothidea	53_S186_L007_g7348.t1			hfid_1590	CYP706				FAD_binding_4;BBE	SP(Sec/SPI)					FAD binding domain-containing protein	F:oxidoreductase activity; P:oxidation-reduction process; F:FAD binding
B. dothidea	53_S186_L007_g7630.t1			hfid_1590	CYP706				FAD_binding_4	SP(Sec/SPI)					FAD binding domain-containing protein	F:oxidoreductase activity; P:oxidation-reduction process; F:FAD binding
B. dothidea	53_S186_L007_g7922.t1	(-)-Mellein	T1PKS	hfid_1590	CYP706				FAD_binding_4	SP(Sec/SPI)					putative fad binding domain containing protein	C:extracellular region
B. dothidea	53_S186_L007_g8597.t1			hfid_1590	CYP706				FAD_binding_4						FAD binding domain-containing protein	F:oxidoreductase activity; P:oxidation-reduction process; F:FAD binding
B. dothidea	53_S186_L007_g8676.t1			hfid_1590	CYP706				FAD_binding_4;BBE						FAD binding domain-containing protein	F:oxidoreductase activity; P:oxidation-reduction process; F:FAD binding
B. dothidea	53_S186_L007_g8856.t1			hfid_1590	CYP706				FAD_binding_4						oxidoreductase, FAD-binding protein	F:catalytic activity; F:oxidoreductase activity; F:flavin adenine dinucleotide binding; P:oxidation-reduction process; F:FAD binding
B. dothidea	53_S186_L007_g8922.t1			hfid_1590	CYP706				FAD_binding_4	SP(Sec/SPI)					FAD binding domain-containing protein	F:oxidoreductase activity; P:oxidation-reduction process; F:FAD binding
B. dothidea	53_S186_L007_g9063.t1			hfid_1590	CYP706				FAD_binding_4	SP(Sec/SPI)					FAD binding domain protein	F:oxidoreductase activity; P:oxidation-reduction process; F:FAD binding
B. dothidea	53_S186_L007_g9278.t1			hfid_1590	CYP706				FAD_binding_4	SP(Sec/SPI)					putative fad binding domain-containing protein	F:flavin adenine dinucleotide binding
B. dothidea	53_S186_L007_g9630.t1			hfid_1590	CYP706				FAD_binding_4;BBE	SP(Sec/SPI)					FAD binding domain protein	F:oxidoreductase activity; F:flavin adenine dinucleotide binding
B. dothidea	53_S186_L007_g9666.t1			hfid_1590	CYP706				ABC_tran;ABC2_membrane;FAD_binding_4;Fungal_trans;PDR_CDR;BBE		3.A.1	The_ATP-binding_Cassette_(ABC)_Superfamily	_Primary_Active_Transporters	3.A.1.205.12	ABC transporter PMR5	C:membrane
B. dothidea	53_S186_L007_g9687.t1			hfid_1590	CYP706				FAD_binding_4;BBE						FAD binding domain-containing protein	F:oxidoreductase activity; P:oxidation-reduction process; F:FAD binding
B. dothidea	53_S186_L007_g10101.t1			hfid_553	CYP71				Abhydrolase_1	SP(Sec/SPI)					soluble epoxide hydrolase	F:catalytic activity; F:hydrolase activity
B. dothidea	53_S186_L007_g10533.t1			hfid_548	CYP71				p450						cytochrome P450 71B25	F:binding; F:oxidoreductase activity
B. dothidea	53_S186_L007_g10844.t1			hfid_553	CYP71				Abhydrolase_1						putative alpha beta hydrolase fold-1 protein	F:hydrolase activity
B. dothidea	53_S186_L007_g11875.t1			hfid_548	CYP71				p450						putative afln vera monooxygenase protein	F:monooxygenase activity; F:iron ion binding; P:positive regulation of sterigmatocystin biosynthetic process; C:integral component of membrane; F:oxidoreductase activity, acting on paired donors, with incorporation or reduction of molecular oxygen; F:heme binding; F:versicolorin reductase activity; P:oxidation-reduction process
B. dothidea	53_S186_L007_g12076.t1			hfid_553	CYP71				EHN						epoxide hydrolase	F:catalytic activity
B. dothidea	53_S186_L007_g12136.t1			hfid_551	CYP71				RVT_1						retrovirus polyprotein, putative	F:nucleic acid binding; C:cellular_component; P:biological_process; F:zinc ion binding; P:DNA integration
B. dothidea	53_S186_L007_g147.t1			hfid_553	CYP71				Abhydrolase_1						putative alpha beta hydrolase fold-1 protein	F:hydrolase activity
B. dothidea	53_S186_L007_g1470.t1			hfid_553	CYP71				Abhydrolase_1						epoxide hydrolase 4	F:catalytic activity
B. dothidea	53_S186_L007_g1589.t1			hfid_553	CYP71				Abhydrolase_1	SP(Sec/SPI)					alpha/beta hydrolase fold domain containing protein	F:lysophospholipase activity; P:phospholipid catabolic process
B. dothidea	53_S186_L007_g1593.t1			hfid_553	CYP71				Abhydrolase_1						soluble epoxide hydrolase	F:catalytic activity
B. dothidea	53_S186_L007_g2379.t1			hfid_553	CYP71				Abhydrolase_1						epoxide hydrolase	F:hydrolase activity
B. dothidea	53_S186_L007_g2548.t1			hfid_553	CYP71				Abhydrolase_1						putative alpha beta hydrolase fold-1 protein	F:catalytic activity; F:hydrolase activity
B. dothidea	53_S186_L007_g3107.t1			hfid_553	CYP71				Hydrolase_4						3-oxoadipate enol-lactone hydrolase	F:catalytic activity
B. dothidea	53_S186_L007_g3504.t1	Alternapyrone	T1PKS	hfid_540	CYP71				p450;FAD_binding_4						6-hydroxy-d-nicotine oxidase	F:monooxygenase activity; F:iron ion binding; C:membrane; F:oxidoreductase activity, acting on paired donors, with incorporation or reduction of molecular oxygen; F:heme binding; P:oxidation-reduction process; F:FAD binding
B. dothidea	53_S186_L007_g4105.t1			hfid_581	CYP71				p450						flavonoid 3',5'-hydroxylase	F:monooxygenase activity; F:iron ion binding; C:integral component of membrane; F:oxidoreductase activity, acting on paired donors, with incorporation or reduction of molecular oxygen; F:heme binding; P:oxidation-reduction process
B. dothidea	53_S186_L007_g4526.t1			hfid_573	CYP71	GH16	GH16		Glyco_hydro_16;TauD	SP(Sec/SPI)					putative alpha-ketoglutarate dependent xanthine dioxygenase protein	F:dioxygenase activity; P:oxidation-reduction process
B. dothidea	53_S186_L007_g4628.t1			hfid_553	CYP71				Abhydrolase_1						putative epoxide hydrolase protein	F:hydrolase activity
B. dothidea	53_S186_L007_g463.t1	ACT-Toxin	NRPS-like|NRPS|T1PKS	hfid_553	CYP71				Abhydrolase_1						alpha beta hydrolase fold protein	F:hydrolase activity
B. dothidea	53_S186_L007_g4897.t1			hfid_553	CYP71				Abhydrolase_1						putative alpha beta hydrolase fold-1 protein	F:hydrolase activity
B. dothidea	53_S186_L007_g4948.t1			hfid_553	CYP71				FAA_hydrolase;Abhydrolase_6						fumarylacetoacetate hydrolase-like protein	F:hydrolase activity
B. dothidea	53_S186_L007_g5213.t1			hfid_553	CYP71				Abhydrolase_1						putative alpha beta hydrolase fold-1 protein	F:hydrolase activity
B. dothidea	53_S186_L007_g5435.t1			hfid_553	CYP71				Abhydrolase_1						putative hydrolase protein	F:hydrolase activity
B. dothidea	53_S186_L007_g5539.t1			hfid_553	CYP71				Abhydrolase_1						alpha beta hydrolase fold protein	F:catalytic activity
B. dothidea	53_S186_L007_g5621.t1			hfid_577	CYP71				p450						cytochrome P-450	F:monooxygenase activity; F:iron ion binding; C:membrane; F:oxidoreductase activity, acting on paired donors, with incorporation or reduction of molecular oxygen; F:heme binding; P:oxidation-reduction process
B. dothidea	53_S186_L007_g6117.t1		T1PKS	hfid_581	CYP71				p450						Cytochrome P450	F:iron ion binding; F:oxidoreductase activity, acting on paired donors, with incorporation or reduction of molecular oxygen; F:heme binding; P:oxidation-reduction process
B. dothidea	53_S186_L007_g617.t1			hfid_573	CYP71				Sec3_C;Sec3-PIP2_bind		1.F.2	The_Octameric_Exocyst_(Exocyst)_Family	_Channels/Pores	1.F.2.1.1	putative exocyst complex component protein	C:exocyst; F:phosphatidylinositol-4,5-bisphosphate binding; C:plasma membrane; P:exocytosis; P:Golgi to plasma membrane transport; F:GTP-Rho binding; P:exocyst localization
B. dothidea	53_S186_L007_g6402.t1			hfid_553	CYP71				Hydrolase_4						putative alpha beta hydrolase family protein	C:membrane; C:integral component of membrane; F:hydrolase activity
B. dothidea	53_S186_L007_g666.t1			hfid_539	CYP71										hypothetical protein UCRNP2_9622	C:membrane; C:integral component of membrane
B. dothidea	53_S186_L007_g7286.t1			hfid_553	CYP71				Abhydrolase_1						putative epoxide hydrolase	F:hydrolase activity
B. dothidea	53_S186_L007_g7556.t1			hfid_553	CYP71				Abhydrolase_6						putative Fluoroacetate dehalogenase	F:catalytic activity; F:hydrolase activity
B. dothidea	53_S186_L007_g7585.t1			hfid_540	CYP71				p450;HET						heterokaryon incompatibility protein	F:monooxygenase activity; F:iron ion binding; C:cellular_component; C:membrane; C:integral component of membrane; F:oxidoreductase activity; F:oxidoreductase activity, acting on paired donors, with incorporation or reduction of molecular oxygen; F:heme binding; F:metal ion binding; P:oxidation-reduction process
B. dothidea	53_S186_L007_g9285.t1			hfid_548	CYP71				p450	SP(Sec/SPI)					putative cytochrome p450 71b25 protein	F:iron ion binding; F:oxidoreductase activity, acting on paired donors, with incorporation or reduction of molecular oxygen; F:heme binding; P:oxidation-reduction process
B. dothidea	53_S186_L007_g9466.t1			hfid_553	CYP71				Abhydrolase_1						putative epoxide hydrolase 2 protein	F:hydrolase activity
B. dothidea	53_S186_L007_g9811.t1			hfid_562	CYP71				PX						Phox-like protein	F:phosphatidylinositol-3-phosphate binding
B. dothidea	53_S186_L007_g9820.t1			hfid_542	CYP71				Pyrophosphatase						inorganic pyrophosphatase	F:magnesium ion binding; F:inorganic diphosphatase activity; C:extracellular region; C:cytoplasm; P:phosphate-containing compound metabolic process
B. dothidea	53_S186_L007_g3334.t1			hfid_1612	CYP714				PHD;zf-RING_2		3.A.16	The_Endoplasmic_Reticular_Retrotranslocon_(ER-RT)_Family	_Primary_Active_Transporters	3.A.16.1.2	PHD and RING finger domain-containing protein	F:metal ion binding
B. dothidea	53_S186_L007_g4928.t1			hfid_1612	CYP714				zf-RING_2	SP(Sec/SPI)	8.A.112	The_Respiratory_Supercomplex_Factor_(Rcf)_Family	_Accessory_Factors_Involved_in_Transport	8.A.112.1.6	putative ring finger domain protein	C:membrane
B. dothidea	53_S186_L007_g797.t1			hfid_1612	CYP714				zf-RING_2		3.A.16	The_Endoplasmic_Reticular_Retrotranslocon_(ER-RT)_Family	_Primary_Active_Transporters	3.A.16.1.4	E3 ubiquitin-protein ligase RHA2A-like	F:zinc ion binding; C:integral component of membrane
B. dothidea	53_S186_L007_g9226.t1			hfid_1612	CYP714				zf-RING_2;zinc_ribbon_9;Fis1_TPR_N;Fis1_TPR_C		3.A.16	The_Endoplasmic_Reticular_Retrotranslocon_(ER-RT)_Family	_Primary_Active_Transporters	3.A.16.1.3	mitochondria fission 1 protein	P:mitochondrial fission; C:mitochondrial outer membrane; C:integral component of membrane
B. dothidea	53_S186_L007_g1675.t1			hfid_1658	CYP749				Pkinase;GRIP;Reo_sigmaC;Spc7;GAS		9.A.15	The_Autophagy-related_Phagophore-formation_Transporter_(APT)_Family	_Incompletely_Characterized_Transport_Systems	9.A.15.3.1	putative viral a-type inclusion protein repeat protein	F:protein kinase activity; F:ATP binding; P:protein phosphorylation
B. dothidea	53_S186_L007_g2949.t1			hfid_1658	CYP749				Pkinase		9.B.106	The_Pock_Size-determining_Protein_(PSDP)_Family	_Incompletely_Characterized_Transport_Systems	9.B.106.3.3	STE/STE7/MKK protein kinase	F:protein serine/threonine kinase activity; F:ATP binding; P:protein phosphorylation
B. dothidea	53_S186_L007_g5748.t1			hfid_1658	CYP749				Pkinase_Tyr						serine/threonine protein kinase	F:protein kinase activity; F:ATP binding; P:protein phosphorylation
B. dothidea	53_S186_L007_g6216.t1			hfid_1658	CYP749				Pkinase						CMGC/SRPK protein kinase	F:protein serine/threonine kinase activity; F:ATP binding; P:protein phosphorylation
B. dothidea	53_S186_L007_g9145.t1			hfid_1658	CYP749				Pkinase		1.I.1	The_Eukaryotic_Nuclear_Pore_Complex_(E-NPC)_Family	_Channels/Pores	1.I.1.1.3	protein kinase domain-containing protein	P:protein phosphorylation; F:kinase activity
B. dothidea	53_S186_L007_g7483.t1			hfid_593	CYP75				GATase_2;GXGXG;Glu_synthase;Glu_syn_central;Pyr_redox_2;Fer4_20						glutamate synthase	F:iron ion binding; P:glutamate biosynthetic process; F:FMN binding; F:glutamate synthase (NADH) activity; F:flavin adenine dinucleotide binding; F:3 iron, 4 sulfur cluster binding; P:oxidation-reduction process
B. dothidea	53_S186_L007_g2934.t1			hfid_601	CYP76				p450						cytochrome P450	F:monooxygenase activity; F:iron ion binding; F:oxidoreductase activity, acting on paired donors, with incorporation or reduction of molecular oxygen; F:heme binding; P:oxidation-reduction process
B. dothidea	53_S186_L007_g5429.t1			hfid_601	CYP76				p450						cytochrome P450	F:monooxygenase activity; F:iron ion binding; C:integral component of membrane; F:oxidoreductase activity, acting on paired donors, with incorporation or reduction of molecular oxygen; F:heme binding; P:oxidation-reduction process
B. dothidea	53_S186_L007_g5431.t1			hfid_601	CYP76				p450						cytochrome p450	F:iron ion binding; C:membrane; F:oxidoreductase activity, acting on paired donors, with incorporation or reduction of molecular oxygen; F:heme binding; P:oxidation-reduction process
B. dothidea	53_S186_L007_g10556.t1			hfid_615	CYP78				p450						putative cytochrome p450 protein	F:iron ion binding; F:oxidoreductase activity, acting on paired donors, with incorporation or reduction of molecular oxygen; F:heme binding; P:oxidation-reduction process
B. dothidea	53_S186_L007_g11004.t1			hfid_615	CYP78				p450						cytochrome P450	C:membrane; F:oxidoreductase activity; F:metal ion binding
B. dothidea	53_S186_L007_g11093.t1			hfid_617	CYP78				RTA1		9.A.26	The_Lipid-translocating_Exporter_(LTE)_Family	_Incompletely_Characterized_Transport_Systems	9.A.26.1.1	Rta1 domain-containing protein	C:integral component of membrane; C:cell part
B. dothidea	53_S186_L007_g11992.t1			hfid_617	CYP78				RTA1		9.A.26	The_Lipid-translocating_Exporter_(LTE)_Family	_Incompletely_Characterized_Transport_Systems	9.A.26.1.2	RTA1 domain protein	C:membrane
B. dothidea	53_S186_L007_g12361.t1			hfid_617	CYP78				RTA1		9.A.26	The_Lipid-translocating_Exporter_(LTE)_Family	_Incompletely_Characterized_Transport_Systems	9.A.26.1.3	RTA1 like protein	C:membrane
B. dothidea	53_S186_L007_g12386.t1			hfid_617	CYP78				RTA1		9.A.26	The_Lipid-translocating_Exporter_(LTE)_Family	_Incompletely_Characterized_Transport_Systems	9.A.26.1.3	RTA1-domain-containing protein	C:integral component of membrane
B. dothidea	53_S186_L007_g1344.t1			hfid_617	CYP78				RTA1		9.A.26	The_Lipid-translocating_Exporter_(LTE)_Family	_Incompletely_Characterized_Transport_Systems	9.A.26.1.1	Rta1 domain-containing protein	C:fungal-type vacuole; C:plasma membrane
B. dothidea	53_S186_L007_g1516.t1			hfid_617	CYP78				RTA1		9.A.26	The_Lipid-translocating_Exporter_(LTE)_Family	_Incompletely_Characterized_Transport_Systems	9.A.26.1.1	RTA1 domain protein	C:membrane
B. dothidea	53_S186_L007_g2133.t1			hfid_617	CYP78				RTA1		9.A.26	The_Lipid-translocating_Exporter_(LTE)_Family	_Incompletely_Characterized_Transport_Systems	9.A.26.1.1	Rta1 domain-containing protein	C:integral component of membrane
B. dothidea	53_S186_L007_g3230.t1			hfid_617	CYP78				RTA1		9.A.26	The_Lipid-translocating_Exporter_(LTE)_Family	_Incompletely_Characterized_Transport_Systems	9.A.26.1.3	RTA1 like protein	C:fungal-type vacuole; C:plasma membrane; C:integral component of membrane
B. dothidea	53_S186_L007_g328.t1			hfid_617	CYP78				RTA1		9.A.26	The_Lipid-translocating_Exporter_(LTE)_Family	_Incompletely_Characterized_Transport_Systems	9.A.26.1.1	RTA1 domain-containing protein	C:integral component of membrane
B. dothidea	53_S186_L007_g3720.t1			hfid_617	CYP78				RTA1		9.A.26	The_Lipid-translocating_Exporter_(LTE)_Family	_Incompletely_Characterized_Transport_Systems	9.A.26.1.1	RTA1 domain protein	C:integral component of membrane; C:cell part
B. dothidea	53_S186_L007_g4203.t1			hfid_617	CYP78				RTA1		9.A.26	The_Lipid-translocating_Exporter_(LTE)_Family	_Incompletely_Characterized_Transport_Systems	9.A.26.1.1	putative rta1 domain protein	C:integral component of membrane
B. dothidea	53_S186_L007_g4618.t1			hfid_617	CYP78				RTA1		9.A.26	The_Lipid-translocating_Exporter_(LTE)_Family	_Incompletely_Characterized_Transport_Systems	9.A.26.1.2	parasitic phase-specific protein PSP-1	C:fungal-type vacuole; C:plasma membrane; C:integral component of membrane
B. dothidea	53_S186_L007_g4658.t1			hfid_617	CYP78				RTA1		9.A.26	The_Lipid-translocating_Exporter_(LTE)_Family	_Incompletely_Characterized_Transport_Systems	9.A.26.1.4	putative rta1 domain protein	C:integral component of membrane; C:cell part
B. dothidea	53_S186_L007_g4895.t1			hfid_617	CYP78				RTA1		9.A.26	The_Lipid-translocating_Exporter_(LTE)_Family	_Incompletely_Characterized_Transport_Systems	9.A.26.1.3	rta1 domain-containing protein	C:fungal-type vacuole; C:plasma membrane; C:integral component of membrane
B. dothidea	53_S186_L007_g5578.t1			hfid_617	CYP78				Zn_clus;RTA1		9.A.26	The_Lipid-translocating_Exporter_(LTE)_Family	_Incompletely_Characterized_Transport_Systems	9.A.26.1.1	Rta1 domain-containing protein	C:integral component of membrane
B. dothidea	53_S186_L007_g5840.t1			hfid_617	CYP78				RTA1		9.A.26	The_Lipid-translocating_Exporter_(LTE)_Family	_Incompletely_Characterized_Transport_Systems	9.A.26.1.4	RTA1 domain protein, putative	C:fungal-type vacuole; C:plasma membrane; C:integral component of membrane
B. dothidea	53_S186_L007_g6156.t1			hfid_617	CYP78				RTA1		9.A.26	The_Lipid-translocating_Exporter_(LTE)_Family	_Incompletely_Characterized_Transport_Systems	9.A.26.1.1	RTM1 protein	C:integral component of membrane
B. dothidea	53_S186_L007_g6181.t1			hfid_615	CYP78				p450						cytochrome P450	F:iron ion binding; C:integral component of membrane; F:oxidoreductase activity, acting on paired donors, with incorporation or reduction of molecular oxygen; F:heme binding; P:oxidation-reduction process
B. dothidea	53_S186_L007_g6983.t1			hfid_617	CYP78				RTA1		9.A.26	The_Lipid-translocating_Exporter_(LTE)_Family	_Incompletely_Characterized_Transport_Systems	9.A.26.1.1	RTA1-domain-containing protein	P:regulation of transcription, DNA-templated; C:integral component of membrane
B. dothidea	53_S186_L007_g8380.t1			hfid_617	CYP78				RTA1		9.A.26	The_Lipid-translocating_Exporter_(LTE)_Family	_Incompletely_Characterized_Transport_Systems	9.A.26.1.2	RTA-like protein	C:fungal-type vacuole; F:hydrolase activity, hydrolyzing O-glycosyl compounds; C:plasma membrane; P:carbohydrate metabolic process; C:integral component of membrane
B. dothidea	53_S186_L007_g8798.t1			hfid_617	CYP78				RTA1		9.A.26	The_Lipid-translocating_Exporter_(LTE)_Family	_Incompletely_Characterized_Transport_Systems	9.A.26.1.1	putative rta1 domain protein	C:membrane
B. dothidea	53_S186_L007_g9516.t1			hfid_617	CYP78				RTA1		9.A.26	The_Lipid-translocating_Exporter_(LTE)_Family	_Incompletely_Characterized_Transport_Systems	9.A.26.1.3	RTA1 like protein	C:membrane
B. dothidea	53_S186_L007_g9632.t1			hfid_617	CYP78				RTA1		9.A.26	The_Lipid-translocating_Exporter_(LTE)_Family	_Incompletely_Characterized_Transport_Systems	9.A.26.1.1	RTA1 domain protein	C:membrane; C:cell part
B. dothidea	53_S186_L007_g9979.t1			hfid_617	CYP78				RTA1		9.A.26	The_Lipid-translocating_Exporter_(LTE)_Family	_Incompletely_Characterized_Transport_Systems	9.A.26.1.2	sphingoid long-chain base transporter RSB1	C:membrane
B. dothidea	53_S186_L007_g12410.t1			hfid_620	CYP79										pol protein	P:cellular process; F:organic cyclic compound binding; F:heterocyclic compound binding
B. dothidea	53_S186_L007_g12423.t1			hfid_620	CYP79				RVT_1						Pol protein	F:binding
B. dothidea	53_S186_L007_g3102.t1			hfid_620	CYP79				DnaJ;DnaJ_CXXCXGXG;DnaJ_C	SP(Sec/SPI)	1.P.1	The_Polyoma_Virus_SV40_ER_Penitration_Channel_(VPEC)_Family	_Channels/Pores	1.P.1.1.1	DnaJ-domain-containing protein	P:protein folding; F:heat shock protein binding; F:metal ion binding; F:unfolded protein binding
B. dothidea	53_S186_L007_g10218.t1			hfid_631	CYP80				p450						cytochrome P450 oxidoreductase	C:membrane; F:oxidoreductase activity; F:metal ion binding
B. dothidea	53_S186_L007_g11800.t1			hfid_631	CYP80				p450						Cytochrome P450	F:binding; F:oxidoreductase activity
B. dothidea	53_S186_L007_g9300.t1			hfid_631	CYP80				p450						Trichodiene oxygenase	C:membrane; F:oxidoreductase activity; F:metal ion binding
B. dothidea	53_S186_L007_g10159.t1	Leucinostatins	T1PKS|NRPS	hfid_648	CYP82				p450						Cytochrome P450	F:iron ion binding; C:integral component of membrane; F:oxidoreductase activity, acting on paired donors, with incorporation or reduction of molecular oxygen; F:heme binding; P:oxidation-reduction process
B. dothidea	53_S186_L007_g150.t1			hfid_648	CYP82				p450						cytochrome p450	F:monooxygenase activity; F:iron ion binding; C:integral component of membrane; F:oxidoreductase activity, acting on paired donors, with incorporation or reduction of molecular oxygen; F:heme binding; P:oxidation-reduction process
B. dothidea	53_S186_L007_g7827.t1			hfid_657	CYP82				p450						cytochrome P450 monooxygenase, putative	F:monooxygenase activity; F:iron ion binding; F:oxidoreductase activity, acting on paired donors, with incorporation or reduction of molecular oxygen; F:heme binding; P:oxidation-reduction process
B. dothidea	53_S186_L007_g4517.t1			hfid_659	CYP83				p450						cytochrome P450	F:iron ion binding; F:oxidoreductase activity, acting on paired donors, with incorporation or reduction of molecular oxygen; F:heme binding; P:oxidation-reduction process
B. dothidea	53_S186_L007_g6609.t1			hfid_661	CYP83				p450						cytochrome P450	F:monooxygenase activity; F:iron ion binding; C:integral component of membrane; F:oxidoreductase activity, acting on paired donors, with incorporation or reduction of molecular oxygen; F:heme binding; P:oxidation-reduction process
B. dothidea	53_S186_L007_g1339.t1			hfid_703	CYP90				PRA1		9.A.49	The_Prenylated_Rab_Acceptor_Protein_1_(PRA1)_Family	_Incompletely_Characterized_Transport_Systems	9.A.49.1.1	prenylated rab acceptor 1	C:endoplasmic reticulum; C:Golgi apparatus; P:endoplasmic reticulum to Golgi vesicle-mediated transport; C:integral component of membrane; C:COPII-coated ER to Golgi transport vesicle
B. dothidea	53_S186_L007_g11350.t1			hfid_706	CYP92
B. dothidea	53_S186_L007_g10677.t1			hfid_719	CYP94										putative pentatricopeptide repeat domain-containing protein	C:integral component of membrane
B. dothidea	53_S186_L007_g2463.t1			hfid_719	CYP94				His_Phos_1						phosphoglycerate mutase-like protein	F:catalytic activity
B. dothidea	53_S186_L007_g4321.t1			hfid_719	CYP94				PPR_2						pentatricopeptide repeat protein	C:mitochondrial membrane
B. dothidea	53_S186_L007_g6887.t1			hfid_719	CYP94				PPR_2						pentatricopeptide repeat protein	C:mitochondrion; C:mitochondrial membrane
B. dothidea	53_S186_L007_g7332.t1			hfid_719	CYP94				PPR_2;PPR_long						putative pentatricopeptide repeat-containing protein	F:nucleic acid binding
B. dothidea	53_S186_L007_g7729.t1			hfid_719	CYP94				PPR_2;PPR_long						pentatricopeptide repeat protein	P:RNA processing
B. dothidea	53_S186_L007_g7753.t1			hfid_719	CYP94				PPR_2						translation regulator (Cya5)	C:mitochondrion; C:mitochondrial membrane
B. dothidea	53_S186_L007_g9565.t1			hfid_719	CYP94				PPR_2						pentatricopeptide repeat protein	C:nucleus; P:mitotic DNA replication termination
B. dothidea	53_S186_L007_g8503.t1			hfid_736	CYP98				p450						putative cytochrome p450 protein	C:membrane; F:oxidoreductase activity; F:metal ion binding; F:flavin adenine dinucleotide binding
B. dothidea	53_S186_L007_g8706.t1			hfid_733	CYP98				p450						cytochrome P450	F:iron ion binding; C:integral component of membrane; F:oxidoreductase activity, acting on paired donors, with incorporation or reduction of molecular oxygen; F:heme binding; P:oxidation-reduction process
B. dothidea	53_S186_L007_g3264.t1							1-Cysteine_peroxiredoxin|Typical_2-Cysteine_peroxiredoxin	AhpC-TSA;1-cysPrx_C						AhpC/TSA family thioredoxin peroxidase, putative	C:cell; F:thioredoxin peroxidase activity; P:cellular response to oxidative stress; P:hydrogen peroxide catabolic process; P:cell redox homeostasis; P:oxidation-reduction process; P:cellular oxidant detoxification
B. dothidea	53_S186_L007_g1543.t1		NRPS-like					1-Cysteine_peroxiredoxin|Typical_2-Cysteine_peroxiredoxin|Atypical_2-Cysteine_peroxiredoxin_(type_Q,_BCP)	AhpC-TSA;1-cysPrx_C						mitochondrial peroxiredoxin PRX1	F:peroxidase activity; C:cytosol; P:cellular response to oxidative stress; P:hydrogen peroxide catabolic process; P:cell redox homeostasis; F:peroxiredoxin activity; P:oxidation-reduction process; P:cellular oxidant detoxification
B. dothidea	53_S186_L007_g3041.t1							Atypical_2-Cysteine_peroxiredoxin_(type_II,_type_V)	Redoxin						AhpC/TSA family protein	C:mitochondrion; C:peroxisome; F:thioredoxin peroxidase activity; P:cellular response to oxidative stress; P:hydrogen peroxide catabolic process; P:cell redox homeostasis; P:oxidation-reduction process; P:cellular oxidant detoxification
B. dothidea	53_S186_L007_g9335.t1							Atypical_2-Cysteine_peroxiredoxin_(type_II,_type_V)	Redoxin						AhpC/TSA family protein-like protein	C:mitochondrion; C:peroxisome; F:thioredoxin peroxidase activity; P:cellular response to oxidative stress; P:hydrogen peroxide catabolic process; P:cell redox homeostasis; P:oxidation-reduction process; P:cellular oxidant detoxification
B. dothidea	53_S186_L007_g139.t1							Atypical_2-Cysteine_peroxiredoxin_(type_Q,_BCP)	AhpC-TSA						merozoite capping protein-1	C:cytoplasm; F:thioredoxin peroxidase activity; P:cellular response to oxidative stress; P:cell redox homeostasis; P:oxidation-reduction process; P:cellular oxidant detoxification
B. dothidea	53_S186_L007_g2039.t1							Carboxymuconolactone_decarboxylase_(no_peroxidase_activity)	CMD						4-carboxymuconolactone decarboxylase	F:peroxiredoxin activity; P:oxidation-reduction process; P:cellular oxidant detoxification
B. dothidea	53_S186_L007_g3510.t1							Carboxymuconolactone_decarboxylase_(no_peroxidase_activity)	CMD						4-carboxymuconolactone decarboxylase family protein	C:cellular_component; F:peroxiredoxin activity; P:oxidation-reduction process; P:cellular oxidant detoxification
B. dothidea	53_S186_L007_g2899.t1							Catalase	Catalase;Catalase-rel	SP(Sec/SPI)					catalase R	F:catalase activity; C:extracellular region; C:cytosol; C:cell surface; P:cellular response to iron ion starvation; F:heme binding; P:hydrogen peroxide catabolic process; F:metal ion binding; P:oxidation-reduction process; P:cellular response to hydrogen peroxide; P:cellular oxidant detoxification
B. dothidea	53_S186_L007_g4649.t1							Catalase	Catalase;Catalase-rel						putative peroxisomal catalase protein	F:catalase activity; P:response to oxidative stress; F:oxidoreductase activity, acting on single donors with incorporation of molecular oxygen, incorporation of two atoms of oxygen; F:heme binding; P:hydrogen peroxide catabolic process; F:metal ion binding; P:oxidation-reduction process; P:cellular oxidant detoxification
B. dothidea	53_S186_L007_g749.t1							Catalase	Catalase;DJ-1_PfpI;Catalase-rel						catalase-domain-containing protein	F:catalase activity; C:cytosol; P:response to oxidative stress; F:heme binding; P:hydrogen peroxide catabolic process; F:metal ion binding; P:oxidation-reduction process; P:cellular oxidant detoxification
B. dothidea	53_S186_L007_g10046.t1							Catalase_peroxidase|Cytochrome_C_peroxidase	peroxidase						catalase-peroxidase	F:catalase activity; C:cytoplasm; P:response to oxidative stress; F:heme binding; P:hydrogen peroxide catabolic process; F:metal ion binding; P:oxidation-reduction process; P:cellular oxidant detoxification
B. dothidea	53_S186_L007_g206.t1							Cytochrome_C_peroxidase|Catalase_peroxidase	peroxidase						class II peroxidase	P:response to reactive oxygen species; F:cytochrome-c peroxidase activity; C:mitochondrial intermembrane space; C:mitochondrial matrix; C:chloroplast; C:integral component of membrane; F:heme binding; P:cellular response to oxidative stress; P:hydrogen peroxide catabolic process; F:metal ion binding; P:oxidation-reduction process; P:cellular oxidant detoxification
B. dothidea	53_S186_L007_g7288.t1							Cytochrome_C_peroxidase|Catalase_peroxidase	peroxidase						heme-binding peroxidase	P:response to reactive oxygen species; F:peroxidase activity; F:heme binding; P:cellular response to oxidative stress; P:hydrogen peroxide catabolic process; F:metal ion binding; P:oxidation-reduction process; P:cellular oxidant detoxification
B. dothidea	53_S186_L007_g5565.t1	HC-toxin	NRPS					Fungi-Bacteria_glutathione_peroxidase	GSHPx						glutathione peroxidase	F:glutathione peroxidase activity; C:mitochondrion; C:cytosol; P:cellular response to oxidative stress; P:oxidation-reduction process; P:cellular oxidant detoxification
B. dothidea	53_S186_L007_g10891.t1							Haloperoxidase_(haem)	Peroxidase_2	SP(Sec/SPI)					hypothetical protein L228DRAFT_271566	F:peroxidase activity; P:cellular oxidant detoxification
B. dothidea	53_S186_L007_g4730.t1							Haloperoxidase_(haem)	Peroxidase_2	SP(Sec/SPI)					Chloroperoxidase-like protein	F:peroxidase activity; P:cellular oxidant detoxification
B. dothidea	53_S186_L007_g4908.t1	Dimethylcoprogen	NRPS					Haloperoxidase_(haem)	Peroxidase_2	SP(Sec/SPI)					Cloroperoxidase	F:peroxidase activity; P:cellular oxidant detoxification
B. dothidea	53_S186_L007_g5991.t1							Haloperoxidase_(haem)	Peroxidase_2	SP(Sec/SPI)					putative oxidase protein	F:peroxidase activity; P:cellular oxidant detoxification
B. dothidea	53_S186_L007_g6341.t1							Haloperoxidase_(haem)	Peroxidase_2	SP(Sec/SPI)					putative heme-thiolate peroxidase aromatic peroxygenase protein	F:peroxidase activity; P:cellular oxidant detoxification
B. dothidea	53_S186_L007_g7379.t1							Haloperoxidase_(haem)	Peroxidase_2	SP(Sec/SPI)					putative aromatic peroxygenase	F:peroxidase activity; P:cellular oxidant detoxification
B. dothidea	53_S186_L007_g7878.t1							Haloperoxidase_(haem)	Peroxidase_2	SP(Sec/SPI)					putative oxidase protein	F:peroxidase activity; P:cellular oxidant detoxification
B. dothidea	53_S186_L007_g834.t1							Haloperoxidase_(haem)	Peroxidase_2	SP(Sec/SPI)					aromatic peroxygenase-like	F:peroxidase activity; P:cellular oxidant detoxification
B. dothidea	53_S186_L007_g933.t1							Haloperoxidase_(haem)	Peroxidase_2	SP(Sec/SPI)					oxidase	F:peroxidase activity; P:cellular oxidant detoxification
B. dothidea	53_S186_L007_g10419.t1							Hybrid_Ascorbate-Cytochrome_C_peroxidase	WSC	SP(Sec/SPI)					WSC-domain-containing protein	F:protein kinase activity; F:ATP binding; P:protein phosphorylation; F:oxidoreductase activity, acting on CH-OH group of donors; F:flavin adenine dinucleotide binding; P:oxidation-reduction process
B. dothidea	53_S186_L007_g1606.t1		NRPS-like					Hybrid_Ascorbate-Cytochrome_C_peroxidase	WSC;DUF1996	SP(Sec/SPI)					WSC-domain-containing protein
B. dothidea	53_S186_L007_g1971.t1					AA5	AA5	Hybrid_Ascorbate-Cytochrome_C_peroxidase	WSC;Glyoxal_oxid_N;DUF1929;PAN_4	SP(Sec/SPI)					copper radical oxidase	P:response to stimulus
B. dothidea	53_S186_L007_g3231.t1							Hybrid_Ascorbate-Cytochrome_C_peroxidase	WSC	SP(Sec/SPI)					WSC-domain-containing protein	C:membrane
B. dothidea	53_S186_L007_g5059.t1							Hybrid_Ascorbate-Cytochrome_C_peroxidase	WSC	SP(Sec/SPI)					WSC-domain-containing protein	P:nitrogen compound metabolic process; P:macromolecule metabolic process; P:primary metabolic process
B. dothidea	53_S186_L007_g5061.t1							Hybrid_Ascorbate-Cytochrome_C_peroxidase	WSC						WSC domain-containing protein 2	C:extracellular region; P:proteolysis; F:hydrolase activity
B. dothidea	53_S186_L007_g4720.t1							Hybrid_Ascorbate-Cytochrome_C_peroxidase|Catalase_peroxidase	peroxidase;PAN_4	SP(Sec/SPI)					putative wsc domain containing protein	F:peroxidase activity; P:response to oxidative stress; F:heme binding; F:metal ion binding; P:oxidation-reduction process; P:cellular oxidant detoxification
B. dothidea	53_S186_L007_g11404.t1							Hybrid_Ascorbate-Cytochrome_C_peroxidase|Manganese_peroxidase|Versatile_peroxidase|Cytochrome_C_peroxidase	peroxidase						WSC domain-containing protein	F:binding; P:response to oxidative stress; F:oxidoreductase activity; P:cellular metabolic process; P:cellular response to chemical stimulus
B. dothidea	53_S186_L007_g4864.t1							Hybrid_Ascorbate-Cytochrome_C_peroxidase|Versatile_peroxidase	peroxidase	SP(Sec/SPI)					WSC domain-containing protein	F:binding; P:response to oxidative stress; F:oxidoreductase activity; P:cellular metabolic process; P:cellular response to chemical stimulus
B. dothidea	53_S186_L007_g7831.t1							Hybrid_Ascorbate-Cytochrome_C_peroxidase|Versatile_peroxidase|Catalase_peroxidase	peroxidase	SP(Sec/SPI)					heme peroxidase	F:peroxidase activity; P:response to oxidative stress; F:heme binding; F:metal ion binding; P:oxidation-reduction process; P:cellular oxidant detoxification
B. dothidea	53_S186_L007_g3078.t1							New_Doux	EF-hand_7		8.A.82	The_Calmodulin_Calcium_Binding_Protein_(Calmodulin)_Family	_Accessory_Factors_Involved_in_Transport	8.A.82.2.7	neuronal calcium sensor 1	F:calcium ion binding
B. dothidea	53_S186_L007_g3343.t1							New_Doux	EF-hand_7		8.A.82	The_Calmodulin_Calcium_Binding_Protein_(Calmodulin)_Family	_Accessory_Factors_Involved_in_Transport	8.A.82.1.1	EF-hand-like domain protein	F:calcium ion binding; P:calcium-mediated signaling; P:spindle pole body organization
B. dothidea	53_S186_L007_g7893.t1							New_Doux	EF-hand_7		8.A.82	The_Calmodulin_Calcium_Binding_Protein_(Calmodulin)_Family	_Accessory_Factors_Involved_in_Transport	8.A.82.1.6	calcineurin regulatory subunit B	F:calcium ion binding
B. dothidea	53_S186_L007_g12215.t1							New_NoxA|New_NoxB|New_Rbohs|New_Doux|New_NoxC	Ferric_reduct;FAD_binding_8;NAD_binding_6		5.B.1	The_Phagocyte_(gp91<sup>phox</sup>)_NADPH_Oxidase_Family	_Transmembrane_Electron_Carriers	5.B.1.1.3	NADPH oxidase	C:integral component of membrane; F:oxidoreductase activity; P:oxidation-reduction process
B. dothidea	53_S186_L007_g833.t1							New_NoxA|New_NoxB|New_Rbohs|New_NoxC|New_Doux	Ferric_reduct;FAD_binding_8;NAD_binding_6		5.B.1	The_Phagocyte_(gp91<sup>phox</sup>)_NADPH_Oxidase_Family	_Transmembrane_Electron_Carriers	5.B.1.1.1	NADPH oxidase	C:integral component of membrane; F:oxidoreductase activity; P:oxidation-reduction process
B. dothidea	53_S186_L007_g4010.t1							New_NoxB|New_NoxA|New_Rbohs|New_Doux|New_NoxC	Ferric_reduct;FAD_binding_8;NAD_binding_6		5.B.1	The_Phagocyte_(gp91<sup>phox</sup>)_NADPH_Oxidase_Family	_Transmembrane_Electron_Carriers	5.B.1.1.1	NADPH oxidase	C:integral component of membrane; F:oxidoreductase activity; P:oxidation-reduction process
B. dothidea	53_S186_L007_g2923.t1							New_Rbohs	Ferric_reduct;FAD_binding_8;NAD_binding_6		5.B.1	The_Phagocyte_(gp91<sup>phox</sup>)_NADPH_Oxidase_Family	_Transmembrane_Electron_Carriers	5.B.1.4.1	putative metalloreductase fre8 protein	C:membrane
B. dothidea	53_S186_L007_g5122.t1							New_Rbohs	Ferric_reduct;FAD_binding_8;NAD_binding_6		5.B.1	The_Phagocyte_(gp91<sup>phox</sup>)_NADPH_Oxidase_Family	_Transmembrane_Electron_Carriers	5.B.1.5.3	ferric-chelate reductase	C:integral component of membrane; F:oxidoreductase activity; P:oxidation-reduction process
B. dothidea	53_S186_L007_g4475.t1							NoxR	SH3_1;Ysc84		8.A.34	The_Endophilin_(Endophilin)_Family	_Accessory_Factors_Involved_in_Transport	8.A.34.1.2	DUF500-domain-containing protein
B. dothidea	53_S186_L007_g4886.t1							NoxR	TPR_1;PB1						NADPH oxidase regulator NoxR
B. dothidea	53_S186_L007_g6294.t1							NoxR	SH3_1;VHS;GAT		3.A.31	The_Endosomal_Sorting_Complexes_Required_for_Transport_III_(ESCRT-III)_Family	_Primary_Active_Transporters	3.A.31.1.1	class E vacuolar protein-sorting machinery protein hse1	P:intracellular protein transport; C:endosome membrane
B. dothidea	53_S186_L007_g11174.t1							Other_class_II_peroxidase|Lignin_peroxidase|Manganese_peroxidase|Versatile_peroxidase	peroxidase;Peroxidase_ext	SP(Sec/SPI)	9.A.61	The_Domain_of_Unknown_Function_3339_(DUF3339)_Family	_Incompletely_Characterized_Transport_Systems	9.A.61.3.1	ligninase LG6 precursor	F:peroxidase activity; P:response to oxidative stress; F:heme binding; F:metal ion binding; P:oxidation-reduction process; P:cellular oxidant detoxification
B. dothidea	53_S186_L007_g9543.t1					AA2	AA2	Other_class_II_peroxidase|Lignin_peroxidase|Manganese_peroxidase|Versatile_peroxidase	peroxidase	SP(Sec/SPI)					heme peroxidase	F:peroxidase activity; P:response to oxidative stress; F:heme binding; F:metal ion binding; P:oxidation-reduction process; P:cellular oxidant detoxification
B. dothidea	53_S186_L007_g6749.t1					AA2	AA2	Other_class_II_peroxidase|Versatile_peroxidase|Lignin_peroxidase|Manganese_peroxidase	peroxidase	SP(Sec/SPI)					heme peroxidase	F:peroxidase activity; P:response to oxidative stress; F:heme binding; F:metal ion binding; P:oxidation-reduction process; P:cellular oxidant detoxification
B. dothidea	53_S186_L007_g5591.t1							Other_class_II_peroxidase|Versatile_peroxidase|Manganese_peroxidase|Lignin_peroxidase	peroxidase;Peroxidase_ext	SP(Sec/SPI)	9.A.61	The_Domain_of_Unknown_Function_3339_(DUF3339)_Family	_Incompletely_Characterized_Transport_Systems	9.A.61.3.1	heme peroxidase	F:peroxidase activity; P:response to oxidative stress; F:heme binding; F:metal ion binding; P:oxidation-reduction process; P:cellular oxidant detoxification
B. dothidea	53_S186_L007_g5452.t1							Prostaglandin_H_synthase_(Cyclooxygenase)	ABC_tran		3.A.1	The_ATP-binding_Cassette_(ABC)_Superfamily	_Primary_Active_Transporters	3.A.1.23.2	ABC transporter	F:ATP binding; F:ATPase activity
B. dothidea	53_S186_L007_g11294.t1							Prostaglandin_H_synthase_(Cyclooxygenase)|New_Doux	An_peroxidase		5.B.1	The_Phagocyte_(gp91<sup>phox</sup>)_NADPH_Oxidase_Family	_Transmembrane_Electron_Carriers	5.B.1.1.6	peroxidase family protein	F:peroxidase activity; P:response to oxidative stress; F:heme binding; P:oxidation-reduction process; P:cellular oxidant detoxification
B. dothidea	53_S186_L007_g8731.t1							Typical_2-Cysteine_peroxiredoxin|1-Cysteine_peroxiredoxin	AhpC-TSA;1-cysPrx_C						thioredoxin-like protein	C:cytosol; F:thioredoxin peroxidase activity; C:integral component of membrane; P:positive regulation of transcription from RNA polymerase II promoter in response to oxidative stress; P:hydrogen peroxide catabolic process; P:negative regulation of DNA-binding transcription factor activity; P:cell redox homeostasis; F:unfolded protein binding; P:oxidation-reduction process; P:cellular detoxificati…
B. dothidea	53_S186_L007_g1.t1														hypothetical protein UCRNP2_8993	C:integral component of membrane
B. dothidea	53_S186_L007_g10.t1								RALF	SP(Sec/SPI)					rapid alkalinization factor-like	C:plasmodesma; P:calcium-mediated signaling
B. dothidea	53_S186_L007_g100.t1														hypothetical protein UCRNP2_9749
B. dothidea	53_S186_L007_g1000.t1								Cu-oxidase;Cu-oxidase_2;Cu-oxidase_3		2.A.108	The_Iron/Lead_Transporter_(ILT)_Family	_Electrochemical_Potential-driven_Transporters	2.A.108.1.7	Multicopper oxidase	F:copper ion binding; C:membrane; P:oxidation-reduction process
B. dothidea	53_S186_L007_g10000.t1									SP(Sec/SPI)					antigenic thaumatin domain protein, putative	C:extracellular region
B. dothidea	53_S186_L007_g10001.t1								adh_short;adh_short_C2						short chain dehydrogenase/reductase	P:cellular amino acid biosynthetic process
B. dothidea	53_S186_L007_g10002.t1								FKBP_C		8.A.11	The_Immunophilin-like_Prolyl:peptidyl_Isomerase_Regulator_(I-PPI)_Family	_Accessory_Factors_Involved_in_Transport	8.A.11.1.2	peptidyl-prolyl cis-trans isomerase	P:protein peptidyl-prolyl isomerization; F:peptidyl-prolyl cis-trans isomerase activity; C:cytoplasm; P:chaperone-mediated protein folding
B. dothidea	53_S186_L007_g10003.t1								PHP						histidinol phosphate phosphatase H	P:histidine biosynthetic process; F:histidinol-phosphatase activity; P:dephosphorylation
B. dothidea	53_S186_L007_g10004.t1								NUDIX						NUDIX domain, putative	C:cytosol; P:dGTP catabolic process; F:8-oxo-7,8-dihydrodeoxyguanosine triphosphate pyrophosphatase activity
B. dothidea	53_S186_L007_g10005.t1								CUE						putative amfr protein	C:membrane
B. dothidea	53_S186_L007_g10006.t1								MR_MLE_C						L-galactonate dehydratase	P:cellular amino acid catabolic process; P:carbohydrate catabolic process; F:L-fuconate dehydratase activity
B. dothidea	53_S186_L007_g10007.t1														putative ankyrin repeat-containing protein	C:membrane; C:integral component of membrane
B. dothidea	53_S186_L007_g10008.t1														geranylgeranyl pyrophosphate synthetase
B. dothidea	53_S186_L007_g10009.t1								AAA;AAA_11;AAA_12		3.A.24	The_Type_VII_or_ESX_Protein_Secretion_System_(T7SS)_Family	_Primary_Active_Transporters	3.A.24.2.1	AAA family ATPase	F:organic cyclic compound binding; F:heterocyclic compound binding
B. dothidea	53_S186_L007_g1001.t1								HET						predicted protein	C:membrane; C:integral component of membrane
B. dothidea	53_S186_L007_g10011.t1								DUF2855						hypothetical protein AURDEDRAFT_81812	F:molecular_function; C:cellular_component; P:biological_process
B. dothidea	53_S186_L007_g10012.t1								Sulfotransfer_3						nad dependent epimerase	F:molecular_function; C:cellular_component; P:biological_process; C:membrane; C:integral component of membrane
B. dothidea	53_S186_L007_g10013.t1														predicted protein	C:membrane; C:integral component of membrane
B. dothidea	53_S186_L007_g10014.t1								GST_N_2;GST_C_2						putative Glutathione s-transferase	F:DNA binding; C:nucleus; P:transcription, DNA-templated; F:zinc ion binding; F:transferase activity
B. dothidea	53_S186_L007_g10015.t1								SnoaL						predicted protein	P:polyketide metabolic process
B. dothidea	53_S186_L007_g10016.t1								NmrA						putative nmra-like family protein
B. dothidea	53_S186_L007_g10017.t1								HET	SP(Sec/SPI)					putative heterokaryon incompatibility protein
B. dothidea	53_S186_L007_g10018.t1														putative heat shock protein 70 protein	F:iron ion binding; C:membrane; C:integral component of membrane; F:oxidoreductase activity, acting on paired donors, with incorporation or reduction of molecular oxygen; F:heme binding; P:oxidation-reduction process
B. dothidea	53_S186_L007_g10019.t1								Glyco_hydro_16	SP(Sec/SPI)					glycoside hydrolase family 16 protein	C:membrane; F:hydrolase activity
B. dothidea	53_S186_L007_g1002.t1								NAD_binding_8						flavin-binding monooxygenase-like family protein	F:nucleotide binding; F:oxidoreductase activity
B. dothidea	53_S186_L007_g10020.t1								zf-H2C2_2						DNA-binding protein creA	P:carbon catabolite repression of transcription from RNA polymerase II promoter by glucose; F:RNA polymerase II proximal promoter sequence-specific DNA binding; F:DNA-binding transcription factor activity; C:nucleus; C:cytoplasm; P:regulation of carbon utilization
B. dothidea	53_S186_L007_g10021.t1								Amidohydro_2						amidohydrolase family protein	C:cellular_component; F:hydrolase activity
B. dothidea	53_S186_L007_g10023.t1								PH;SAM_2;SH3_9						polarized growth protein Boi2	C:membrane
B. dothidea	53_S186_L007_g10024.t1								Mpp10;SDA1;DUF2052;Drc1-Sld2
B. dothidea	53_S186_L007_g10025.t1								ApbA;ApbA_C						2-dehydropantoate 2-reductase	F:2-dehydropantoate 2-reductase activity; P:pantothenate biosynthetic process; P:oxidation-reduction process
B. dothidea	53_S186_L007_g10026.t1								Fungal_trans						fungal specific transcription factor	P:regulation of transcription, DNA-templated; C:membrane; F:metal ion binding
B. dothidea	53_S186_L007_g10027.t1								DUF1338						duf1338 domain protein
B. dothidea	53_S186_L007_g10028.t1								Aldolase_II						L-fuculose-phosphate aldolase
B. dothidea	53_S186_L007_g10029.t1								Asp_Glu_race						putative aspartate racemase protein	C:membrane
B. dothidea	53_S186_L007_g1003.t1								CN_hydrolase						aliphatic nitrilase	P:nitrogen compound metabolic process; F:arylacetonitrilase activity
B. dothidea	53_S186_L007_g10030.t1								2-Hacid_dh;2-Hacid_dh_C						glycerate-and formate-dehydrogenase	F:oxidoreductase activity, acting on the CH-OH group of donors, NAD or NADP as acceptor; F:NAD binding; P:oxidation-reduction process
B. dothidea	53_S186_L007_g10031.t1								DAO						putative sarcosine oxidase protein	C:membrane; C:integral component of membrane; F:oxidoreductase activity; P:oxidation-reduction process
B. dothidea	53_S186_L007_g10032.t1								Sugar_tr		2.A.1	The_Major_Facilitator_Superfamily_(MFS)	_Electrochemical_Potential-driven_Transporters	2.A.1.1.119	putative mfs quinate transporter protein	F:binding; C:integral component of membrane; F:transmembrane transporter activity; P:transmembrane transport
B. dothidea	53_S186_L007_g10033.t1								PT	SP(Sec/SPI)					hypothetical protein UCRNP2_822
B. dothidea	53_S186_L007_g10034.t1								Aldo_ket_red		8.A.5	The_Voltage-gated_K<sup>+</sup>_Channel_&beta;-subunit_(Kv&beta;)_Family	_Accessory_Factors_Involved_in_Transport	8.A.5.1.6	Aldo/keto reductase	F:oxidoreductase activity; P:oxidation-reduction process
B. dothidea	53_S186_L007_g10035.t1								Tyrosinase	SP(Sec/SPI)					amino acid transporter	F:oxidoreductase activity; F:metal ion binding; P:oxidation-reduction process
B. dothidea	53_S186_L007_g10037.t1														putative f-box domain-containing protein
B. dothidea	53_S186_L007_g10038.t1								Arrestin_N						putative arrestin (or s-antigen) domain protein	F:molecular_function; C:cellular_component; P:biological_process
B. dothidea	53_S186_L007_g10039.t1									SP(Sec/SPI)					predicted protein	C:membrane; C:integral component of membrane
B. dothidea	53_S186_L007_g1004.t1										9.B.313	The_7_TMS_Domain-containing_Protein_(7DCP)_Family	_Incompletely_Characterized_Transport_Systems	9.B.313.1.1	hypothetical protein UCRNP2_2948	C:integral component of membrane
B. dothidea	53_S186_L007_g10040.t1								EMP70	SP(Sec/SPI)	8.A.68	The_Endomembrane_protein-70_(EMP70)_Family	_Accessory_Factors_Involved_in_Transport	8.A.68.1.2	endomembrane protein 70	C:integral component of membrane
B. dothidea	53_S186_L007_g10041.t1								Pkinase						kinase-like protein	F:protein kinase activity; F:protein serine/threonine kinase activity; F:ATP binding; P:protein phosphorylation; F:kinase activity; P:phosphorylation
B. dothidea	53_S186_L007_g10042.t1								Abhydrolase_6		1.C.57	The_Clostridial_Cytotoxin_(CCT)_Family	_Channels/Pores	1.C.57.3.4	abhydrolase domain-containing protein 12B	C:membrane
B. dothidea	53_S186_L007_g10043.t1								zf-C2H2_4						homeobox and c2h2 transcription	F:nucleic acid binding
B. dothidea	53_S186_L007_g10044.t1								DUF4139;DUF4140;Nucleoporin_FG		1.I.1	The_Eukaryotic_Nuclear_Pore_Complex_(E-NPC)_Family	_Channels/Pores	1.I.1.1.2	putative mucoidy inhibitor-like protein	F:molecular_function; C:cellular_component; P:proteolysis; P:biological_process; F:serine-type peptidase activity
B. dothidea	53_S186_L007_g10045.t1														ser/Thr protein phosphatase family protein	F:molecular_function; C:cellular_component; P:biological_process; F:hydrolase activity
B. dothidea	53_S186_L007_g10048.t1									SP(Sec/SPI)					hypothetical protein UCRNP2_7480
B. dothidea	53_S186_L007_g10049.t1									SP(Sec/SPI)					hypothetical protein UCRNP2_9403
B. dothidea	53_S186_L007_g1005.t1								IDO						predicted protein	F:binding; P:tryptophan metabolic process; C:membrane; F:oxidoreductase activity
B. dothidea	53_S186_L007_g10050.t1								Fungal_trans						putative transcription factor fungi protein	F:binding
B. dothidea	53_S186_L007_g10051.t1								adh_short						short-chain dehydrogenase	C:cellular_component; F:oxidoreductase activity; P:oxidation-reduction process
B. dothidea	53_S186_L007_g10053.t1								NmrA						NmrA-like family protein
B. dothidea	53_S186_L007_g10054.t1								Dioxygenase_C	SP(Sec/SPI)					putative protocatechuate -dioxygenase beta subunit protein	P:cellular aromatic compound metabolic process; F:ferric iron binding; F:catechol 1,2-dioxygenase activity; P:oxidation-reduction process
B. dothidea	53_S186_L007_g10055.t1									SP(Sec/SPI)					hypothetical protein COCSADRAFT_115299	F:molecular_function; C:cellular_component; P:biological_process
B. dothidea	53_S186_L007_g10056.t1								Amidase;Fungal_trans_2						amidase family protein	C:cellular_component; P:biological_process
B. dothidea	53_S186_L007_g10057.t1								Metallophos	SP(Sec/SPI)					Ser/Thr protein phosphatase family protein	F:sphingomyelin phosphodiesterase activity; C:extracellular space; P:sphingomyelin catabolic process; F:hydrolase activity, acting on glycosyl bonds; F:metal ion binding
B. dothidea	53_S186_L007_g10058.t1								Amidohydro_1						Metallo-dependent hydrolase	C:cellular_component; P:biological_process; C:membrane; C:integral component of membrane; F:hydrolase activity; F:hydrolase activity, acting on carbon-nitrogen (but not peptide) bonds
B. dothidea	53_S186_L007_g10059.t1														putative mss4-like protein
B. dothidea	53_S186_L007_g1006.t1								Amidohydro_1						putative amidohydrolase protein	F:adenosine deaminase activity; F:iron ion binding; C:integral component of membrane; F:oxidoreductase activity, acting on paired donors, with incorporation or reduction of molecular oxygen; F:heme binding; F:S-adenosylhomocysteine deaminase activity; P:transmembrane transport; P:oxidation-reduction process
B. dothidea	53_S186_L007_g10060.t1								PET117						putative cytochrome c oxidase assembly protein	C:mitochondrion; C:integral component of membrane; P:mitochondrial respiratory chain complex IV assembly
B. dothidea	53_S186_L007_g10061.t1								V-ATPase_G		3.A.2	The_H<sup>+</sup>-_or_Na<sup>+</sup>-translocating_F-type,_V-type_and_A-type_ATPase_(F-ATPase)_Superfamily	_Primary_Active_Transporters	3.A.2.2.6	H+-ATPase G subunit	C:vacuolar proton-transporting V-type ATPase complex; F:hydrolase activity; F:ATPase-coupled transmembrane transporter activity; P:proton transmembrane transport
B. dothidea	53_S186_L007_g10062.t1														triacylglycerol lipase	F:hydrolase activity
B. dothidea	53_S186_L007_g10063.t1								MFS_1		2.A.1	The_Major_Facilitator_Superfamily_(MFS)	_Electrochemical_Potential-driven_Transporters	2.A.1.3.73	putative major facilitator superfamily protein	C:integral component of membrane
B. dothidea	53_S186_L007_g10064.t1									SP(Sec/SPI)					putative f-box domain cyclin-like protein
B. dothidea	53_S186_L007_g10065.t1										9.B.313	The_7_TMS_Domain-containing_Protein_(7DCP)_Family	_Incompletely_Characterized_Transport_Systems	9.B.313.1.4	putative integral membrane protein	C:integral component of membrane
B. dothidea	53_S186_L007_g10066.t1								Arrestin_N;Bul1_C						putative arrestin domain-containing protein
B. dothidea	53_S186_L007_g10067.t1	Aflatrem	T1PKS|terpene						2OG-FeII_Oxy;DIOX_N						2-oxoglutarate-dependent ethylene/succinate-forming enzyme	F:metal ion binding; F:dioxygenase activity; P:oxidation-reduction process
B. dothidea	53_S186_L007_g10068.t1	Aflatrem	T1PKS|terpene
B. dothidea	53_S186_L007_g10069.t1	Aflatrem	T1PKS|terpene						Flavoprotein						phenylacrylic acid decarboxylase	F:mRNA binding; C:mitochondrion; F:carboxy-lyase activity; P:cellular response to oxidative stress; P:cinnamic acid catabolic process; P:cofactor biosynthetic process; F:flavin prenyltransferase activity
B. dothidea	53_S186_L007_g1007.t1								L_HMGIC_fpl	SP(Sec/SPI)					hypothetical protein UCRNP2_2945	C:integral component of membrane
B. dothidea	53_S186_L007_g10070.t1	Aflatrem	T1PKS|terpene						UbiD						putative 3-octaprenyl-4-hydroxybenzoate carboxy- protein	C:cytoplasm; P:aromatic amino acid family catabolic process; F:carboxy-lyase activity; P:styrene metabolic process; F:manganese ion binding; P:ferulate metabolic process; F:identical protein binding; P:cinnamic acid catabolic process
B. dothidea	53_S186_L007_g10072.t1	Aflatrem	T1PKS|terpene						MIP;DUF3328		1.A.8	The_Major_Intrinsic_Protein_(MIP)_Family	_Channels/Pores	1.A.8.9.18	Aquaporin-like protein	F:urea transmembrane transporter activity; F:channel activity; C:membrane; C:integral component of membrane; P:transmembrane transport; P:urea transmembrane transport
B. dothidea	53_S186_L007_g10073.t1	Aflatrem	T1PKS|terpene						Rieske;DAO		3.D.3	The_Proton-translocating_Quinol:Cytochrome_c_Reductase_(QCR)_Superfamily	_Primary_Active_Transporters	3.D.3.5.1	FAD dependent oxidoreductase	C:cytoplasm; F:oxidoreductase activity
B. dothidea	53_S186_L007_g10075.t1	Aflatrem	T1PKS|terpene												integral membrane protein	F:molecular_function; C:cellular_component; P:biological_process; C:membrane; C:integral component of membrane; P:terpenoid biosynthetic process; F:lyase activity
B. dothidea	53_S186_L007_g10076.t1	Aflatrem	T1PKS|terpene						FAD_binding_3						FAD-dependent monooxygenase	F:oxidoreductase activity
B. dothidea	53_S186_L007_g10077.t1	Aflatrem	T1PKS|terpene						UbiA						UbiA prenyltransferase	P:ubiquinone biosynthetic process; F:4-hydroxybenzoate octaprenyltransferase activity; C:integral component of mitochondrial inner membrane
B. dothidea	53_S186_L007_g10078.t1	Aflatrem	T1PKS|terpene						polyprenyl_synt		5.B.14	The_Flavin-based_Extracellular_Electron_Transfer_(F-EET)_Family	_Transmembrane_Electron_Carriers	5.B.14.1.1	geranylgeranyl pyrophosphate synthetase AtmG	P:isoprenoid biosynthetic process; C:integral component of membrane; F:transferase activity
B. dothidea	53_S186_L007_g10079.t1	Aflatrem	T1PKS|terpene												predicted protein	F:DNA-binding transcription factor activity, RNA polymerase II-specific; C:nucleus; P:regulation of transcription, DNA-templated; P:regulation of transcription by RNA polymerase II; F:zinc ion binding
B. dothidea	53_S186_L007_g1008.t1								MFS_1		2.A.1	The_Major_Facilitator_Superfamily_(MFS)	_Electrochemical_Potential-driven_Transporters	2.A.1.2.33	MFS general substrate transporter	C:integral component of plasma membrane; P:drug transmembrane transport
B. dothidea	53_S186_L007_g10080.t1	Aflatrem	T1PKS|terpene							SP(Sec/SPI)					hypothetical protein UCRNP2_3278
B. dothidea	53_S186_L007_g10081.t1	Aflatrem	T1PKS|terpene						Methyltransf_11						methyltransferase domain-containing protein	F:transferase activity
B. dothidea	53_S186_L007_g10082.t1	Aflatrem	T1PKS|terpene						HTH_AraC;Ada_Zn_binding						hypothetical protein W97_09155	F:DNA binding; F:DNA-binding transcription factor activity; F:methylated-DNA-[protein]-cysteine S-methyltransferase activity; P:DNA repair; P:regulation of transcription, DNA-templated; F:methyltransferase activity; F:zinc ion binding; P:methylation; F:sequence-specific DNA binding
B. dothidea	53_S186_L007_g10084.t1														hypothetical protein W97_01376	F:molecular_function; C:cellular_component; P:biological_process; C:membrane; C:integral component of membrane
B. dothidea	53_S186_L007_g10085.t1								MFS_1		2.A.1	The_Major_Facilitator_Superfamily_(MFS)	_Electrochemical_Potential-driven_Transporters	2.A.1.3.52	aminotriazole resistance protein	C:integral component of membrane; P:transmembrane transport
B. dothidea	53_S186_L007_g10086.t1														putative a-alpha x4 protein
B. dothidea	53_S186_L007_g10087.t1								Hydantoinase_A;Hydantoinase_B;Hydant_A_N						Hydantoinase B/oxoprolinase	F:nucleotide binding; F:hydrolase activity
B. dothidea	53_S186_L007_g10088.t1								Hydrolase_4						Proline iminopeptidase	P:proteolysis; F:peptidase activity
B. dothidea	53_S186_L007_g10089.t1								Rax2	SP(Sec/SPI)					cellular morphogenesis protein	C:integral component of membrane
B. dothidea	53_S186_L007_g1009.t1								ECR1_N;KH_6						exosome complex exonuclease Rrp4	C:nuclear exosome (RNase complex); C:cytoplasmic exosome (RNase complex); P:exonucleolytic trimming to generate mature 3'-end of 5.8S rRNA from tricistronic rRNA transcript (SSU-rRNA, 5.8S rRNA, LSU-rRNA); C:nuclear chromatin; F:RNA binding; F:exonuclease activity; P:nuclear-transcribed mRNA catabolic process, exonucleolytic, 3'-5'; P:U4 snRNA 3'-end processing; P:nuclear polyadenylation-dependen…
B. dothidea	53_S186_L007_g10090.t1														hypothetical protein UCRNP2_7360
B. dothidea	53_S186_L007_g10091.t1								Peptidase_S9;DPPIV_N		8.A.51	The_Dipeptidyl-aminopeptidase-like_Protein_6_beta_subunit_of_Kv4_channels_(DPP6)_Family	_Accessory_Factors_Involved_in_Transport	8.A.51.1.1	putative dipeptidyl-aminopeptidase B	F:aminopeptidase activity; F:serine-type endopeptidase activity; C:vacuole; P:proteolysis; C:integral component of membrane
B. dothidea	53_S186_L007_g10092.t1								S1;SHS2_Rpb7-N						DNA-directed RNA polymerase II 19 kDa polypeptide	P:nuclear-transcribed mRNA catabolic process, exonucleolytic; C:P-body; F:single-stranded DNA binding; F:single-stranded RNA binding; F:DNA-directed 5'-3' RNA polymerase activity; C:RNA polymerase II, core complex; P:transcription initiation from RNA polymerase II promoter; F:translation initiation factor binding; P:positive regulation of translational initiation; P:positive regulation of nuclear…
B. dothidea	53_S186_L007_g10093.t1								DUF962						DUF962-domain-containing protein	C:integral component of membrane; P:sphingoid catabolic process
B. dothidea	53_S186_L007_g10094.t1								ATP-synt_ab;ATP-synt_ab_C;ATP-synt_ab_N		3.A.2	The_H<sup>+</sup>-_or_Na<sup>+</sup>-translocating_F-type,_V-type_and_A-type_ATPase_(F-ATPase)_Superfamily	_Primary_Active_Transporters	3.A.2.1.11	ATP synthase subunit alpha, mitochondrial	F:ATP binding; P:ATP synthesis coupled proton transport; C:proton-transporting ATP synthase complex, catalytic core F(1); F:proton-transporting ATP synthase activity, rotational mechanism
B. dothidea	53_S186_L007_g10095.t1														hypothetical protein UCRNP2_6067
B. dothidea	53_S186_L007_g10096.t1														hypothetical protein UCRNP2_6068
B. dothidea	53_S186_L007_g10097.t1								Bromo_TP						putative bromodomain associated domain protein	F:protein heterodimerization activity
B. dothidea	53_S186_L007_g10098.t1								TAFII55_N						transcription initiation factor TFIID subunit 7	F:translation initiation factor activity; F:calcium ion binding; C:transcription factor TFIID complex; P:transcription initiation from RNA polymerase II promoter; P:translational initiation
B. dothidea	53_S186_L007_g10099.t1								Carb_kinase						YjeF domain-containing protein	F:ATP binding; C:cytoplasm; F:kinase activity; P:phosphorylation; P:nicotinamide nucleotide metabolic process; F:ATP-dependent NAD(P)H-hydrate dehydratase activity; F:ADP-dependent NAD(P)H-hydrate dehydratase activity
B. dothidea	53_S186_L007_g101.t1								ALAD						delta-aminolevulinic acid dehydratase	F:porphobilinogen synthase activity; C:cytosol; P:heme biosynthetic process; F:zinc ion binding
B. dothidea	53_S186_L007_g1010.t1								PLDc_2						phospholipase D/nuclease	F:catalytic activity
B. dothidea	53_S186_L007_g10100.t1								Sugar_tr		2.A.1	The_Major_Facilitator_Superfamily_(MFS)	_Electrochemical_Potential-driven_Transporters	2.A.1.1.68	sugar transporter protein	P:carbohydrate transport; C:integral component of membrane; F:transmembrane transporter activity; P:transmembrane transport
B. dothidea	53_S186_L007_g10102.t1								SH3_1;Myosin_head;Myosin_TH1		1.I.1	The_Eukaryotic_Nuclear_Pore_Complex_(E-NPC)_Family	_Channels/Pores	1.I.1.1.3	PLK protein kinase	F:motor activity; F:actin binding; F:protein serine/threonine kinase activity; F:ATP binding; P:protein phosphorylation; C:integral component of membrane; C:myosin complex
B. dothidea	53_S186_L007_g10104.t1								OPA3						OPA3 domain-containing protein	C:membrane
B. dothidea	53_S186_L007_g10105.t1														putative opa3 domain-containing protein	F:nucleotide binding; F:motor activity; F:actin binding; F:ATP binding; C:myosin complex
B. dothidea	53_S186_L007_g10106.t1								Ank_2;Ank_4		9.A.3	The_Sorting_Nexin27_(SNX27)-Retromer_Assembly_Apparatus_for_Recycling_Integral_Membrane_Proteins_(SNX27-RetromerAA)_Family	_Incompletely_Characterized_Transport_Systems	9.A.3.1.1	ankyrin repeat protein	F:catalytic activity; C:cellular_component; P:nucleoside metabolic process
B. dothidea	53_S186_L007_g10108.t1								Thiolase_N;Thiolase_C						acetyl-CoA acetyltransferase IB	F:transferase activity, transferring acyl groups other than amino-acyl groups
B. dothidea	53_S186_L007_g10109.t1								GTP_EFTU;EFG_C;GTP_EFTU_D2;EFG_IV;EFG_II;EFTUD2						P-loop containing nucleoside triphosphate hydrolase protein	P:mRNA splicing, via spliceosome; C:Prp19 complex; F:translation elongation factor activity; F:GTPase activity; F:GTP binding; C:U5 snRNP; C:cytosol; P:translational elongation; F:U5 snRNA binding; C:U4/U6 x U5 tri-snRNP complex; C:U2-type catalytic step 2 spliceosome; C:post-mRNA release spliceosomal complex; P:regulation of heterochromatin domain assembly
B. dothidea	53_S186_L007_g1011.t1								SpoU_methylase						RNA methyltransferase, TrmH family	P:RNA methylation; F:RNA binding; C:mitochondrion; P:RNA processing; F:methyltransferase activity; F:RNA methyltransferase activity; F:transferase activity; P:methylation
B. dothidea	53_S186_L007_g10110.t1					GH16	GH16		Glyco_hydro_16	SP(Sec/SPI)					putative endo- -beta- protein	F:hydrolase activity, hydrolyzing O-glycosyl compounds; P:carbohydrate metabolic process
B. dothidea	53_S186_L007_g10112.t1								VRR_NUC						coiled-coil domain-containing protein MTMR15	F:phosphodiesterase I activity; C:nucleus; F:5'-3' exonuclease activity; F:5'-flap endonuclease activity; P:interstrand cross-link repair; F:metal ion binding; F:flap-structured DNA binding; P:nucleic acid phosphodiester bond hydrolysis
B. dothidea	53_S186_L007_g10113.t1								DUF202		9.B.51	The_Uncharacterized_DUF202/YidH_(YidH)_Family	_Incompletely_Characterized_Transport_Systems	9.B.51.1.4	hypothetical protein W97_01344	C:integral component of membrane
B. dothidea	53_S186_L007_g10114.t1														PREDICTED: uncharacterized protein LOC107390702 isoform X3
B. dothidea	53_S186_L007_g10115.t1														predicted protein
B. dothidea	53_S186_L007_g10116.t1								DUF2417						putative mitochondrial integral membrane protein	C:integral component of membrane
B. dothidea	53_S186_L007_g10117.t1														predicted protein
B. dothidea	53_S186_L007_g10118.t1														cytoskeleton-associated protein	C:membrane; C:integral component of membrane
B. dothidea	53_S186_L007_g10119.t1								Cation_efflux		2.A.4	The_Cation_Diffusion_Facilitator_(CDF)_Family	_Electrochemical_Potential-driven_Transporters	2.A.4.2.8	cation efflux protein	C:fungal-type vacuole; F:cation transmembrane transporter activity; C:integral component of membrane; C:organelle membrane; C:intracellular organelle part; P:cellular transition metal ion homeostasis; P:zinc ion import into organelle
B. dothidea	53_S186_L007_g1012.t1								SNF2_N;Helicase_C;zf-PHD-like						chromodomain-helicase-DNA-binding protein 4	F:ion binding; F:organic cyclic compound binding; F:heterocyclic compound binding
B. dothidea	53_S186_L007_g10120.t1								Zip		2.A.5	The_Zinc_(Zn<sup>2+</sup>)-Iron_(Fe<sup>2+</sup>)_Permease_(ZIP)_Family	_Electrochemical_Potential-driven_Transporters	2.A.5.1.14	Zinc/iron permease	C:integral component of membrane; P:metal ion transport; F:metal ion transmembrane transporter activity; P:transmembrane transport
B. dothidea	53_S186_L007_g10121.t1								Helicase_C;ResIII		1.I.1	The_Eukaryotic_Nuclear_Pore_Complex_(E-NPC)_Family	_Channels/Pores	1.I.1.1.3	P-loop containing nucleoside triphosphate hydrolase protein	P:cellular process; F:hydrolase activity; F:organic cyclic compound binding; F:heterocyclic compound binding
B. dothidea	53_S186_L007_g10122.t1									SP(Sec/SPI)					predicted protein
B. dothidea	53_S186_L007_g10123.t1								F_actin_cap_B						F-actin capping protein beta subunit	F:actin binding; C:cytoplasm; C:F-actin capping protein complex; P:barbed-end actin filament capping
B. dothidea	53_S186_L007_g10124.t1								adh_short_C2						NAD(P)-binding protein	F:molecular_function; C:cellular_component; P:biological_process; C:membrane; C:integral component of membrane
B. dothidea	53_S186_L007_g10125.t1									SP(Sec/SPI)
B. dothidea	53_S186_L007_g10126.t1								CPSF_A;MMS1_N						cleavage and polyadenylation specificity factor subunit A	C:nucleus
B. dothidea	53_S186_L007_g10127.t1								LMBR1		9.A.54	The_Lysosomal_Cobalamin_(B<sub>12</sub>)_Transporter_(L-B<sub>12</sub>T)_Family	_Incompletely_Characterized_Transport_Systems	9.A.54.1.3	putative lysosomal cobalamin transporter	C:lysosomal membrane; C:integral component of membrane; F:cobalamin binding
B. dothidea	53_S186_L007_g10128.t1									SP(Sec/SPI)					hypothetical protein UCRNP2_75
B. dothidea	53_S186_L007_g10129.t1								Vta1						DUF605-domain-containing protein
B. dothidea	53_S186_L007_g1013.t1														putative btb poz domain-containing protein
B. dothidea	53_S186_L007_g10130.t1								Thioredoxin	SP(Sec/SPI)	8.A.88	The_calciquestrin_(CASQ)_Family	_Accessory_Factors_Involved_in_Transport	8.A.88.1.3	Disulfide isomerase	C:cell; P:cell redox homeostasis
B. dothidea	53_S186_L007_g10131.t1								Ank_2;Ank_5		8.A.28	The_Ankyrin_(Ankyrin)_Family	_Accessory_Factors_Involved_in_Transport	8.A.28.1.2	serine/threonine-protein phosphatase 6 regulatory ankyrin repeat subunit B-like	C:membrane; C:integral component of membrane
B. dothidea	53_S186_L007_g10133.t1								DHDPS						dihydrodipicolinate synthase	F:lyase activity
B. dothidea	53_S186_L007_g10134.t1								Dynamin_N;Dynamin_M;GED		1.I.1	The_Eukaryotic_Nuclear_Pore_Complex_(E-NPC)_Family	_Channels/Pores	1.I.1.1.3	dynamin GTPase, putative	F:nucleotide binding; F:GTPase activity; F:GTP binding; C:membrane; C:integral component of membrane
B. dothidea	53_S186_L007_g10135.t1								ChaC						putative -like protein	F:gamma-glutamylcyclotransferase activity; P:glutathione catabolic process; F:glutathione specific gamma-glutamylcyclotransferase activity
B. dothidea	53_S186_L007_g10136.t1								Complex1_49kDa		3.D.1	The_H<sup>+</sup>_or_Na<sup>+</sup>-translocating_NADH_Dehydrogenase_(NDH)_Family	_Primary_Active_Transporters	3.D.1.6.1	NADH-ubiquinone oxidoreductase subunit	F:NADH dehydrogenase (ubiquinone) activity; F:quinone binding; F:NAD binding; P:oxidation-reduction process
B. dothidea	53_S186_L007_g10137.t1								RNA_pol_A_bac;RNA_pol_L						DNA-directed RNA polymerase I and III subunit Rpc40, putative	F:RNA polymerase I activity; F:RNA polymerase III activity; F:DNA binding; C:RNA polymerase III complex; C:RNA polymerase I complex; P:transcription, DNA-templated; F:protein dimerization activity
B. dothidea	53_S186_L007_g10138.t1														hypothetical protein UCRNP2_3660
B. dothidea	53_S186_L007_g10139.t1								ATP-synt		3.A.2	The_H<sup>+</sup>-_or_Na<sup>+</sup>-translocating_F-type,_V-type_and_A-type_ATPase_(F-ATPase)_Superfamily	_Primary_Active_Transporters	3.A.2.1.3	putative atp synthase gamma chain protein	P:ATP synthesis coupled proton transport; C:proton-transporting ATP synthase complex, catalytic core F(1); F:proton-transporting ATP synthase activity, rotational mechanism
B. dothidea	53_S186_L007_g1014.t1								PIF1						Mitochondrial DNA helicase (Pif1), putative	C:nuclear chromatin; F:DNA binding; F:DNA helicase activity; P:DNA metabolic process; P:DNA replication; P:cellular response to DNA damage stimulus; P:DNA geometric change
B. dothidea	53_S186_L007_g10140.t1								Topoisom_I;Topoisom_I_N;Topo_C_assoc						DNA topoisomerase 1	F:DNA binding; F:DNA topoisomerase type I activity; C:nucleolus; P:DNA replication; P:DNA topological change; P:chromatin remodeling; P:chromosome segregation; C:replication fork protection complex
B. dothidea	53_S186_L007_g10141.t1								Epimerase						NAD dependent epimerase/dehydratase family protein	F:catalytic activity; F:coenzyme binding
B. dothidea	53_S186_L007_g10142.t1								BAH						putative ebs-bah-phd domain-containing protein	F:chromatin binding; F:metal ion binding
B. dothidea	53_S186_L007_g10143.t1														putative ph domain protein
B. dothidea	53_S186_L007_g10144.t1								Exo_endo_phos	SP(Sec/SPI)					DNase I-like protein	F:endonuclease activity; F:exonuclease activity; P:nucleic acid phosphodiester bond hydrolysis
B. dothidea	53_S186_L007_g10147.t1					GH3	GH3		Glyco_hydro_3;Glyco_hydro_3_C;Fn3-like	SP(Sec/SPI)					glycoside hydrolase family 3 protein	F:beta-glucosidase activity; P:cellulose catabolic process; F:scopolin beta-glucosidase activity
B. dothidea	53_S186_L007_g10148.t1								Vps8						vacuolar assembly/sorting protein-like protein VPS8	F:nucleotide binding; F:microtubule motor activity; F:protein binding; F:ATP binding; C:cytoplasm; C:cytoskeleton; C:kinesin complex; C:microtubule; C:cilium; C:axoneme; P:microtubule-based process; P:microtubule-based movement; F:microtubule binding; F:ATP-dependent microtubule motor activity, plus-end-directed; P:protein transport; C:microtubule cytoskeleton; C:membrane; C:integral component of…
B. dothidea	53_S186_L007_g1015.t1								Ribonuc_L-PSP						YjgH family protein	F:molecular_function; C:cellular_component; P:biological_process
B. dothidea	53_S186_L007_g10150.t1								RCR						putative ubiquitin-protein ligase sel1 protein	C:membrane; C:integral component of membrane
B. dothidea	53_S186_L007_g10151.t1														hypothetical protein UCRNP2_2983
B. dothidea	53_S186_L007_g10152.t1								tRNA-synt_2c;DHHA1;tRNA_SAD						alanyl-tRNA synthetase	F:tRNA binding; F:alanine-tRNA ligase activity; F:ATP binding; C:mitochondrion; F:zinc ion binding; P:mitochondrial alanyl-tRNA aminoacylation
B. dothidea	53_S186_L007_g10153.t1														predicted protein
B. dothidea	53_S186_L007_g10154.t1								Dynamin_N;Dynamin_M		1.I.1	The_Eukaryotic_Nuclear_Pore_Complex_(E-NPC)_Family	_Channels/Pores	1.I.1.1.3	dynamin GTPase	F:nucleotide binding; C:cytoplasm; C:membrane; F:hydrolase activity; P:membrane organization
B. dothidea	53_S186_L007_g10156.t1	Leucinostatins	T1PKS|NRPS						ADH_zinc_N;ADH_N						alcohol dehydrogenase, putative	F:zinc ion binding; F:oxidoreductase activity; F:hydrolase activity; F:metal ion binding; P:oxidation-reduction process
B. dothidea	53_S186_L007_g10157.t1	Leucinostatins	T1PKS|NRPS						Zn_clus						predicted protein	F:binding; P:regulation of transcription by RNA polymerase II
B. dothidea	53_S186_L007_g1016.t1					GH79	GH79		Glyco_hydro_79C	SP(Sec/SPI)					glycoside hydrolase family 79 protein	F:molecular_function; F:beta-glucuronidase activity; C:cellular_component; C:extracellular region; P:biological_process; F:hydrolase activity
B. dothidea	53_S186_L007_g10162.t1	Leucinostatins	T1PKS|NRPS												predicted protein	F:iron ion binding; C:membrane; C:integral component of membrane; F:oxidoreductase activity, acting on paired donors, with incorporation or reduction of molecular oxygen; F:heme binding; P:oxidation-reduction process
B. dothidea	53_S186_L007_g10164.t1	Leucinostatins	T1PKS|NRPS						LigB						putative extradiol ring-cleavage dioxygenase class iii protein subunit b protein	P:cellular aromatic compound metabolic process; F:ferrous iron binding; F:dioxygenase activity; P:oxidation-reduction process
B. dothidea	53_S186_L007_g10165.t1	Leucinostatins	T1PKS|NRPS						FAD_binding_3						Aromatic-ring hydroxylase-like protein	F:monooxygenase activity; C:integral component of membrane; P:oxidation-reduction process; F:FAD binding
B. dothidea	53_S186_L007_g10166.t1	Leucinostatins	T1PKS|NRPS						Sugar_tr;MFS_1	SP(Sec/SPI)	2.A.1	The_Major_Facilitator_Superfamily_(MFS)	_Electrochemical_Potential-driven_Transporters	2.A.1.1.82	putative hexose transporter protein	F:transporter activity; P:carbohydrate transport; C:membrane; C:integral component of membrane; F:transmembrane transporter activity; P:transmembrane transport
B. dothidea	53_S186_L007_g10167.t1	Leucinostatins	T1PKS|NRPS						Fungal_trans_2						Zn(2)-C6 fungal-type DNA-binding domain protein	F:DNA-binding transcription factor activity, RNA polymerase II-specific; F:molecular_function; F:DNA binding; C:cellular_component; C:nucleus; P:regulation of transcription, DNA-templated; P:regulation of transcription by RNA polymerase II; P:biological_process; F:zinc ion binding
B. dothidea	53_S186_L007_g10169.t1	Leucinostatins	T1PKS|NRPS						PhyH						phytanoyl-CoA dioxygenase family protein	F:dioxygenase activity; P:oxidation-reduction process
B. dothidea	53_S186_L007_g1017.t1								ADH_zinc_N						isopropanol dehydrogenase	C:cellular_component; P:oxidation-reduction process
B. dothidea	53_S186_L007_g10171.t1	Leucinostatins	T1PKS|NRPS						ketoacyl-synt;PP-binding;Acyl_transf_1;Ketoacyl-synt_C;Methyltransf_12;KR;ADH_zinc_N_2;PS-DH;KAsynt_C_assoc						polyketide synthase	F:oxidoreductase activity; F:transferase activity; F:phosphopantetheine binding; P:oxidation-reduction process
B. dothidea	53_S186_L007_g10172.t1	Leucinostatins	T1PKS|NRPS						Thioesterase						Esterase-like protein	P:biosynthetic process; F:hydrolase activity; F:hydrolase activity, acting on ester bonds
B. dothidea	53_S186_L007_g10174.t1	Leucinostatins	T1PKS|NRPS						Lactamase_B_2						Zn-dependent hydrolase/oxidoreductase family protein, putative	F:zinc ion binding; P:cellular nitrogen compound metabolic process; F:N-acylphosphatidylethanolamine-specific phospholipase D activity; P:organonitrogen compound metabolic process
B. dothidea	53_S186_L007_g10175.t1	Leucinostatins	T1PKS|NRPS												predicted protein	F:binding; C:integral component of membrane
B. dothidea	53_S186_L007_g10176.t1	Leucinostatins	T1PKS|NRPS						bZIP_1						basic-Leucine zipper transcription factor	P:immune system process; P:antigen processing and presentation of peptide antigen via MHC class I; F:DNA-binding transcription factor activity; P:regulation of transcription, DNA-templated; P:immune response; C:membrane; C:integral component of membrane; P:antigen processing and presentation; C:MHC class I protein complex
B. dothidea	53_S186_L007_g10177.t1	Leucinostatins	T1PKS|NRPS						HAD_2						haloacid dehalogenase	F:hydrolase activity
B. dothidea	53_S186_L007_g10178.t1	Leucinostatins	T1PKS|NRPS						Aldolase_II						class II aldolase/adducin domain-containing protein	F:structural molecule activity; C:cytoskeleton; F:spectrin binding; C:plasma membrane raft; F:actin filament binding; P:barbed-end actin filament capping; P:actin filament bundle assembly
B. dothidea	53_S186_L007_g10179.t1	Leucinostatins	T1PKS|NRPS						ABC_tran;ABC_membrane;ABC1		3.A.1	The_ATP-binding_Cassette_(ABC)_Superfamily	_Primary_Active_Transporters	3.A.1.208.40	ABC multidrug transporter	F:nucleotide binding; C:membrane; F:hydrolase activity
B. dothidea	53_S186_L007_g1018.t1								ORMDL						protein ORM1	C:endoplasmic reticulum membrane; C:integral component of membrane
B. dothidea	53_S186_L007_g10180.t1	Leucinostatins	T1PKS|NRPS						2OG-Fe_Oxy_2						TqaL protein	F:dioxygenase activity; P:oxidation-reduction process
B. dothidea	53_S186_L007_g10181.t1	Leucinostatins	T1PKS|NRPS						ketoacyl-synt;Ketoacyl-synt_C						fatty acid synthase alpha subunit FasA	P:fatty acid biosynthetic process; F:oxidoreductase activity, acting on the CH-OH group of donors, NAD or NADP as acceptor; F:transferase activity
B. dothidea	53_S186_L007_g10182.t1	Leucinostatins	T1PKS|NRPS												nucleoside-diphosphate-sugar epimerase	F:molecular_function; C:cellular_component; P:biological_process
B. dothidea	53_S186_L007_g10183.t1	Leucinostatins	T1PKS|NRPS						AMP-binding;PP-binding;Condensation;NAD_binding_4		4.C.1	The_Fatty_Acid_Transporter_(FAT)_Family	_Group_Translocators	4.C.1.1.16	nonribosomal peptide synthase	F:ligase activity; F:phosphopantetheine binding
B. dothidea	53_S186_L007_g10184.t1	Leucinostatins	T1PKS|NRPS						2OG-FeII_Oxy;DIOX_N						Gibberellin 20-oxidase	F:oxidoreductase activity; F:metal ion binding; P:oxidation-reduction process
B. dothidea	53_S186_L007_g10186.t1	Leucinostatins	T1PKS|NRPS						4HBT						thioesterase superfamily protein	F:molecular_function; C:cellular_component; P:biological_process
B. dothidea	53_S186_L007_g10187.t1	Leucinostatins	T1PKS|NRPS						Epimerase						NAD(P)-binding protein	F:catalytic activity; F:coenzyme binding
B. dothidea	53_S186_L007_g10188.t1	Leucinostatins	T1PKS|NRPS												Alpha beta hydrolase fold protein	F:molecular_function; C:cellular_component; P:biological_process; F:hydrolase activity
B. dothidea	53_S186_L007_g10189.t1	Leucinostatins	T1PKS|NRPS						FA_desaturase						delta-12 fatty acid desaturase	P:lipid metabolic process; C:integral component of membrane
B. dothidea	53_S186_L007_g1019.t1								Ino80_Iec3						hypothetical protein UCRNP2_818	P:chromatin remodeling; C:Ino80 complex
B. dothidea	53_S186_L007_g10192.t1								SUR7						predicted protein	C:plasma membrane; C:membrane; C:integral component of membrane; P:plasma membrane fusion involved in cytogamy
B. dothidea	53_S186_L007_g10193.t1								Ank_2		8.A.28	The_Ankyrin_(Ankyrin)_Family	_Accessory_Factors_Involved_in_Transport	8.A.28.1.2	Pfs, NB-ARC and Ankyrin domain protein	F:catalytic activity; P:nucleoside metabolic process; C:membrane; C:integral component of membrane
B. dothidea	53_S186_L007_g10195.t1								HET						HET-domain-containing protein
B. dothidea	53_S186_L007_g10196.t1								Sugar_tr;MR_MLE_C		2.A.1	The_Major_Facilitator_Superfamily_(MFS)	_Electrochemical_Potential-driven_Transporters	2.A.1.1.73	sugar transporter	P:cellular amino acid catabolic process; C:integral component of membrane; P:carbohydrate catabolic process; F:transmembrane transporter activity; F:L-fuconate dehydratase activity; P:transmembrane transport
B. dothidea	53_S186_L007_g10197.t1								MFS_1		2.A.1	The_Major_Facilitator_Superfamily_(MFS)	_Electrochemical_Potential-driven_Transporters	2.A.1.3.52	integral membrane protein	C:membrane
B. dothidea	53_S186_L007_g10198.t1								Asn_synthase;GATase_7						asparagine synthase (glutamine-hydrolyzing)	F:nucleotide binding; F:hydrolase activity, hydrolyzing O-glycosyl compounds; P:carbohydrate metabolic process; P:cellular amino acid biosynthetic process; F:ligase activity; P:alpha-amino acid metabolic process
B. dothidea	53_S186_L007_g10199.t1														putative serine arginine repetitive matrix protein 1 protein	C:nucleus; F:phosphopantetheine binding
B. dothidea	53_S186_L007_g102.t1								S36_mt						Ribosomal protein S36, mitochondrial	F:oxoglutarate dehydrogenase (succinyl-transferring) activity; C:ribosome; P:2-oxoglutarate metabolic process; C:mitochondrial oxoglutarate dehydrogenase complex
B. dothidea	53_S186_L007_g1020.t1								CorA						putative mg2+ transporter zinc transport protein	C:integral component of membrane; P:metal ion transport; F:metal ion transmembrane transporter activity; P:transmembrane transport
B. dothidea	53_S186_L007_g10200.t1								DUF382;PSP						splicing factor 3b	P:mRNA splicing, via spliceosome; C:U2 snRNP; C:catalytic step 2 spliceosome
B. dothidea	53_S186_L007_g10201.t1								PUF						ARM repeat-containing protein	F:RNA binding
B. dothidea	53_S186_L007_g10202.t1					AA9	AA9		Glyco_hydro_61	SP(Sec/SPI)					putative glycosyl hydrolase family 61 protein	F:hydrolase activity
B. dothidea	53_S186_L007_g10203.t1								COesterase	SP(Sec/SPI)	8.A.117	The_Neuroligin_(Nlg)_Family	_Accessory_Factors_Involved_in_Transport	8.A.117.1.2	putative carboxylesterase protein	F:hydrolase activity
B. dothidea	53_S186_L007_g10205.t1								EHN						epoxide hydrolase	F:catalytic activity
B. dothidea	53_S186_L007_g10206.t1								Nucleotid_trans						hypothetical protein UCRNP2_9096	C:membrane
B. dothidea	53_S186_L007_g10207.t1								DUF445						hypothetical protein UCRNP2_3728	C:P-body; F:molecular_function; C:cellular_component; P:biological_process; P:deadenylation-independent decapping of nuclear-transcribed mRNA
B. dothidea	53_S186_L007_g10208.t1														hypothetical protein PV09_09580	F:molecular_function; F:iron ion binding; C:nucleus; C:cytoplasm; C:cytosol; F:oxidoreductase activity, acting on paired donors, with incorporation or reduction of molecular oxygen; F:heme binding; P:mRNA cis splicing, via spliceosome; P:oxidation-reduction process
B. dothidea	53_S186_L007_g10209.t1								UPF0061						UPF0061-domain-containing protein	C:integral component of membrane
B. dothidea	53_S186_L007_g1021.t1								DLH						dienelactone hydrolase family protein	C:cellular_component; P:biological_process; F:hydrolase activity
B. dothidea	53_S186_L007_g10210.t1								dCMP_cyt_deam_1		9.B.317	The_Complex_I_Integral_Membrane_Chaparone,_TMEM126_(TMEM126)_Family	_Incompletely_Characterized_Transport_Systems	9.B.317.1.6	cytidine deaminase-like protein	P:tRNA wobble adenosine to inosine editing; F:catalytic activity; F:tRNA-specific adenosine-34 deaminase activity; C:tRNA-specific adenosine-34 deaminase complex
B. dothidea	53_S186_L007_g10211.t1								Peptidase_M20;M20_dimer						N-carbamoyl-L-amino acid hydrolase	F:hydrolase activity, acting on carbon-nitrogen (but not peptide) bonds, in linear amidines
B. dothidea	53_S186_L007_g10212.t1								PALP;Peptidase_M20;M20_dimer						acetylornithine deacetylase	P:proteolysis; F:metallopeptidase activity; F:hydrolase activity
B. dothidea	53_S186_L007_g10213.t1								MFS_1		2.A.1	The_Major_Facilitator_Superfamily_(MFS)	_Electrochemical_Potential-driven_Transporters	2.A.1.3.73	MFS general substrate transporter	C:membrane
B. dothidea	53_S186_L007_g10214.t1														interspersed repeat antigen	F:histone deacetylase activity; C:membrane; C:integral component of membrane; P:histone deacetylation; F:hydrolase activity; F:NAD-dependent histone deacetylase activity (H3-K14 specific); P:histone H3 deacetylation
B. dothidea	53_S186_L007_g10215.t1								ER_lumen_recept		9.B.191	The_Endoplasmic_Reticulum_Retention_Receptor_(KDELR)_Family	_Incompletely_Characterized_Transport_Systems	9.B.191.1.1	er lumen protein retaining receptor	P:protein retention in ER lumen; P:endoplasmic reticulum to Golgi vesicle-mediated transport; P:protein transport; C:integral component of endoplasmic reticulum membrane; F:HDEL sequence binding
B. dothidea	53_S186_L007_g10216.t1								AAA_16;ORC5_C						origin recognition complex subunit Orc5	C:origin recognition complex; C:nucleus; P:DNA replication
B. dothidea	53_S186_L007_g10219.t1														hypothetical protein CCM_01955
B. dothidea	53_S186_L007_g1022.t1														C-x8-C-x5-C-x3-H type zinc finger protein	F:molecular_function; C:cellular_component; P:biological_process; F:metal ion binding
B. dothidea	53_S186_L007_g10220.t1		NRPS-like												predicted protein
B. dothidea	53_S186_L007_g10222.t1		NRPS-like							SP(Sec/SPI)					quinoprotein amine dehydrogenase beta chain-like protein	F:molecular_function; C:cellular_component; P:biological_process
B. dothidea	53_S186_L007_g10223.t1		NRPS-like						Kelch_6	SP(Sec/SPI)					galactose oxidase	F:molecular_function; C:cellular_component
B. dothidea	53_S186_L007_g10225.t1		NRPS-like												phytanoyl- dioxygenase	F:molecular_function; C:cellular_component; P:biological_process
B. dothidea	53_S186_L007_g10227.t1		NRPS-like						2-Hacid_dh;2-Hacid_dh_C						putative glycerate-and formate-dehydrogenase protein	C:cytosol; F:hydroxypyruvate reductase activity; F:glyoxylate reductase (NADP) activity; F:protein homodimerization activity; F:NAD binding; P:oxidation-reduction process
B. dothidea	53_S186_L007_g10228.t1		NRPS-like						AMP-binding;PP-binding;NAD_binding_4						NRPS-like enzyme	F:catalytic activity; P:metabolic process; F:phosphopantetheine binding
B. dothidea	53_S186_L007_g10229.t1		NRPS-like												C6 transcription factor	F:DNA-binding transcription factor activity, RNA polymerase II-specific; C:nucleus; P:regulation of transcription, DNA-templated; P:regulation of transcription by RNA polymerase II; F:zinc ion binding
B. dothidea	53_S186_L007_g10230.t1		NRPS-like						Zn_clus						C6 transcription factor	F:DNA-binding transcription factor activity, RNA polymerase II-specific; C:nucleus; P:regulation of transcription, DNA-templated; P:regulation of transcription by RNA polymerase II; F:zinc ion binding
B. dothidea	53_S186_L007_g10232.t1		NRPS-like						PEP_mutase						methylisocitrate lyase	F:kinase activity; P:phosphorylation; F:isomerase activity; F:methylisocitrate lyase activity
B. dothidea	53_S186_L007_g10233.t1		NRPS-like						NUDIX						nudix family hydrolase	C:membrane; F:hydrolase activity
B. dothidea	53_S186_L007_g10234.t1														serine-rich protein	F:molecular_function; C:cellular_component; P:biological_process; C:membrane; C:integral component of membrane
B. dothidea	53_S186_L007_g10235.t1								Cyt-b5;FMN_dh						L-lactate dehydrogenase	F:FMN binding; F:oxidoreductase activity; F:heme binding; F:metal ion binding; P:oxidation-reduction process
B. dothidea	53_S186_L007_g10236.t1								DUF2196						c2H2-type zinc-finger domain-containing protein
B. dothidea	53_S186_L007_g10237.t1														Tetratricopeptide-like helical	C:cytoplasm; P:tyrosine catabolic process; P:melanin biosynthetic process from tyrosine
B. dothidea	53_S186_L007_g10238.t1								Glyoxalase;Glyoxalase_4						4-hydroxyphenylpyruvate dioxygenase	F:4-hydroxyphenylpyruvate dioxygenase activity; P:tyrosine catabolic process; F:metal ion binding; P:oxidation-reduction process
B. dothidea	53_S186_L007_g10240.t1														hypothetical protein Z518_03273
B. dothidea	53_S186_L007_g10242.t1								HIG_1_N						putative mitochondrial hypoxia responsive domain containing protein	C:integral component of mitochondrial inner membrane; P:mitochondrial respiratory chain complex IV assembly
B. dothidea	53_S186_L007_g10244.t1														hypothetical protein MYCFIDRAFT_203985	C:fungal-type vacuole membrane; C:extracellular space; P:macroautophagy
B. dothidea	53_S186_L007_g10245.t1								DUF202;SPX;VTC		4.E.1	The_Vacuolar_(Acidocalcisome)_Polyphosphate_Polymerase_(V-PPP)_Family	_Group_Translocators	4.E.1.1.2	SPX-domain-containing protein	C:fungal-type vacuole membrane; C:integral component of membrane; C:vacuolar transporter chaperone complex
B. dothidea	53_S186_L007_g10246.t1								Response_reg;HisKA;HATPase_c		9.B.238	The_Uncharacterized__Bacterial_5_TMS_Protein-1_(UBP1)_Family	_Incompletely_Characterized_Transport_Systems	9.B.238.3.1	Hsp90-like protein	P:signal transduction; F:kinase activity; P:phosphorylation
B. dothidea	53_S186_L007_g10247.t1								Abp2						ARS binding protein Abp2	F:DNA replication origin binding
B. dothidea	53_S186_L007_g10249.t1								RRM_1;CTD_bind						putative rna binding protein	F:RNA binding
B. dothidea	53_S186_L007_g1025.t1								adh_short						3-oxoacyl-(acyl-carrier-protein) reductase	F:oxidoreductase activity; P:oxidation-reduction process
B. dothidea	53_S186_L007_g10251.t1								Mito_carr		2.A.29	The_Mitochondrial_Carrier_(MC)_Family	_Electrochemical_Potential-driven_Transporters	2.A.29.29.1	mitochondrial DNA replication protein YHM2	P:mitochondrial genome maintenance; F:DNA binding; F:tricarboxylate secondary active transmembrane transporter activity; P:regulation of transcription by RNA polymerase II; P:mitochondrial citrate transmembrane transport; P:alpha-ketoglutarate transport; C:integral component of membrane; C:mitochondrial nucleoid
B. dothidea	53_S186_L007_g10252.t1								Sugar_tr		2.A.1	The_Major_Facilitator_Superfamily_(MFS)	_Electrochemical_Potential-driven_Transporters	2.A.1.1.117	high affinity glucose transporter	F:coproporphyrinogen oxidase activity; F:carbohydrate:proton symporter activity; C:integral component of plasma membrane; P:porphyrin-containing compound biosynthetic process; P:carbohydrate transmembrane transport; P:oxidation-reduction process; P:proton transmembrane transport
B. dothidea	53_S186_L007_g10253.t1					GT39			PMT;MIR;PMT_4TMC		9.B.142	The_Integral_membrane_Glycosyltransferase_family_39_(GT39)_Family	_Incompletely_Characterized_Transport_Systems	9.B.142.5.4	glycosyltransferase family 39 protein	F:dolichyl-phosphate-mannose-protein mannosyltransferase activity; C:integral component of membrane; P:fungal-type cell wall organization; P:protein O-linked mannosylation; P:ER-associated misfolded protein catabolic process; C:dolichyl-phosphate-mannose-protein mannosyltransferase Pmt1p-Pmt2p dimer complex
B. dothidea	53_S186_L007_g10254.t1								AAA_12						putative helicase MOV-10 isoform X1	F:RNA binding; F:helicase activity; F:ATP binding; F:hydrolase activity; F:5'-3' RNA helicase activity; P:posttranscriptional gene silencing by RNA
B. dothidea	53_S186_L007_g10255.t1								DUF1708						putative morphogenesis protein
B. dothidea	53_S186_L007_g10256.t1								SRF-TF						SRF-type transcription factor RlmA	F:DNA binding
B. dothidea	53_S186_L007_g10257.t1								EF-hand_8		3.A.5	The_General_Secretory_Pathway_(Sec)_Family	_Primary_Active_Transporters	3.A.5.9.1	putative peflin protein	F:calcium ion binding
B. dothidea	53_S186_L007_g10258.t1														predicted protein	P:cysteine biosynthetic process from serine
B. dothidea	53_S186_L007_g10259.t1								PCNA_N;PCNA_C						proliferating cell nuclear antigen	P:meiotic mismatch repair; C:chromosome, telomeric region; C:nuclear chromatin; F:DNA binding; C:nucleoplasm; P:leading strand elongation; P:nucleotide-excision repair; P:chromatin silencing at telomere; F:DNA polymerase processivity factor activity; P:chromatin silencing at silent mating-type cassette; P:establishment of mitotic sister chromatid cohesion; P:maintenance of DNA trinucleotide repea…
B. dothidea	53_S186_L007_g1026.t1														hypothetical protein UCRNP2_4051
B. dothidea	53_S186_L007_g10260.t1								Phos_pyr_kin						pyridoxal kinase	F:pyridoxal kinase activity; P:pyridoxal 5'-phosphate salvage; P:phosphorylation
B. dothidea	53_S186_L007_g10261.t1								dUTPase						dUTP diphosphatase	F:magnesium ion binding; F:dUTP diphosphatase activity; P:dUMP biosynthetic process; P:dUTP catabolic process
B. dothidea	53_S186_L007_g10262.t1								CAP_GLY;BLOC1_2;CLIP1_ZNF						putative cap-gly domain-containing protein	P:G protein-coupled receptor signaling pathway
B. dothidea	53_S186_L007_g10263.t1									SP(Sec/SPI)					hypothetical protein UCRNP2_2688
B. dothidea	53_S186_L007_g10264.t1								Methyltransf_11						hypothetical protein W97_01161	C:cellular_component; P:mRNA processing; F:methyltransferase activity; P:methylation
B. dothidea	53_S186_L007_g10265.t1								Ribul_P_3_epim						Ribulose-phosphate 3-epimerase	F:ribulose-phosphate 3-epimerase activity; C:cytosol; P:pentose-phosphate shunt, non-oxidative branch; P:pentose catabolic process; P:cellular carbohydrate metabolic process; F:metal ion binding
B. dothidea	53_S186_L007_g10266.t1								ELMO_CED12;DUF3361;PH_12						ELMO/CED-12 family protein
B. dothidea	53_S186_L007_g10267.t1								DUF1752						protein phosphatase type 1 complex subunit Hex2/Reg1	P:regulation of carbohydrate metabolic process; P:protein catabolic process in the vacuole; P:cellular response to glucose starvation
B. dothidea	53_S186_L007_g10268.t1								LSM						U6 snRNA-associated Sm-like protein LSm2	P:mRNA splicing, via spliceosome; C:P-body; C:spliceosomal complex; C:U6 snRNP; F:poly(U) RNA binding; C:U4/U6 x U5 tri-snRNP complex
B. dothidea	53_S186_L007_g10269.t1								Phosphodiest						Phosphodiest-domain-containing protein	C:integral component of membrane; F:pyrophosphatase activity
B. dothidea	53_S186_L007_g1027.t1									SP(Sec/SPI)					predicted protein	F:molecular_function; C:cellular_component; C:membrane; C:integral component of membrane
B. dothidea	53_S186_L007_g10270.t1								eIF-3_zeta						eukaryotic translation initiation factor 3 subunit D	P:formation of cytoplasmic translation initiation complex; P:cap-dependent translational initiation; F:translation initiation factor activity; C:eukaryotic translation initiation factor 3 complex; C:eukaryotic 43S preinitiation complex; C:eukaryotic 48S preinitiation complex; F:mRNA cap binding
B. dothidea	53_S186_L007_g10271.t1								adh_short_C2						NAD(P)-binding protein
B. dothidea	53_S186_L007_g10272.t1								Glyoxalase						glyoxalase family protein	F:dioxygenase activity; P:oxidation-reduction process
B. dothidea	53_S186_L007_g10273.t1								HLH						putative hlh transcription factor protein	F:protein dimerization activity
B. dothidea	53_S186_L007_g10274.t1								dCMP_cyt_deam_1						cytidine deaminase	F:cytidine deaminase activity; C:cytoplasm; F:zinc ion binding; P:cytidine deamination; P:cellular component assembly
B. dothidea	53_S186_L007_g10275.t1								Ank_2		8.A.28	The_Ankyrin_(Ankyrin)_Family	_Accessory_Factors_Involved_in_Transport	8.A.28.1.1	ankyrin repeat containing protein	F:catalytic activity; P:signal transduction; P:nucleoside metabolic process; C:membrane; C:integral component of membrane
B. dothidea	53_S186_L007_g10276.t1														putative amino acid permease protein
B. dothidea	53_S186_L007_g1028.t1								Gln-synt_C						glutamine synthetase	F:ligase activity; P:cellular metabolic process; P:organonitrogen compound metabolic process
B. dothidea	53_S186_L007_g10280.t1								Aldo_ket_red		8.A.5	The_Voltage-gated_K<sup>+</sup>_Channel_&beta;-subunit_(Kv&beta;)_Family	_Accessory_Factors_Involved_in_Transport	8.A.5.1.1	putative voltage-gated potassium channel beta-2 subunit protein
B. dothidea	53_S186_L007_g10281.t1								2OG-FeII_Oxy;DIOX_N						2OG-Fe(II) oxygenase superfamily protein	F:metal ion binding; F:dioxygenase activity; P:oxidation-reduction process
B. dothidea	53_S186_L007_g10282.t1								PhyH						putative phytanoyl- dioxygenase protein	F:dioxygenase activity; P:oxidation-reduction process
B. dothidea	53_S186_L007_g10283.t1								Peptidase_S15;PepX_C						x-pro dipeptidyl-peptidase c-terminal non-catalytic domain-containing protein	P:proteolysis; F:dipeptidyl-peptidase activity
B. dothidea	53_S186_L007_g10284.t1								MFS_1		2.A.1	The_Major_Facilitator_Superfamily_(MFS)	_Electrochemical_Potential-driven_Transporters	2.A.1.2.33	MFS general substrate transporter	C:fungal-type vacuole membrane; F:transporter activity; C:integral component of plasma membrane; P:drug transmembrane transport
B. dothidea	53_S186_L007_g10285.t1														C2H2 type zinc finger domain-containing protein	F:DNA-binding transcription factor activity, RNA polymerase II-specific; F:nucleic acid binding; F:DNA binding; C:nucleus; P:transcription, DNA-templated; P:regulation of transcription, DNA-templated; P:regulation of transcription by RNA polymerase II; F:zinc ion binding; F:metal ion binding
B. dothidea	53_S186_L007_g10286.t1								Oxidored_FMN						NADH:flavin oxidoreductase/NADH oxidase family protein	F:FMN binding; F:oxidoreductase activity; P:oxidation-reduction process
B. dothidea	53_S186_L007_g10287.t1								EthD						putative dimeric alpha-beta barrel protein	F:molecular_function; C:cellular_component; P:biological_process; C:membrane; C:integral component of membrane
B. dothidea	53_S186_L007_g10288.t1								DUF1989						Meiotic chromosome segregation protein
B. dothidea	53_S186_L007_g10289.t1								ADH_zinc_N;ADH_N						alcohol dehydrogenase GroES-like domain-containing protein	C:cellular_component; F:oxidoreductase activity; P:oxidation-reduction process
B. dothidea	53_S186_L007_g1029.t1								Aldedh						aldehyde dehydrogenase family protein	F:aldehyde dehydrogenase (NAD) activity; F:succinate-semialdehyde dehydrogenase (NAD+) activity; P:glutamine metabolic process; C:integral component of membrane; P:oxidation-reduction process
B. dothidea	53_S186_L007_g10290.t1														ethyl tert-butyl ether degradation
B. dothidea	53_S186_L007_g10291.t1								adh_short						short-chain dehydrogenase/reductase	F:oxidoreductase activity; P:oxidation-reduction process
B. dothidea	53_S186_L007_g10292.t1								NDUFB10		3.D.1	The_H<sup>+</sup>_or_Na<sup>+</sup>-translocating_NADH_Dehydrogenase_(NDH)_Family	_Primary_Active_Transporters	3.D.1.6.2	putative nadh-ubiquinone oxidoreductase 12 kda subunit protein	C:mitochondrial respiratory chain complex I
B. dothidea	53_S186_L007_g10293.t1														pH-response regulator protein palC	C:membrane; C:cell part
B. dothidea	53_S186_L007_g10294.t1								Acyltransferase;Acyltransf_C						1-acyl-sn-glycerol-3-phosphate acyltransferase	C:membrane; F:transferase activity
B. dothidea	53_S186_L007_g10295.t1								bZIP_1						hypothetical protein W97_01199	F:DNA-binding transcription factor activity; P:regulation of transcription, DNA-templated
B. dothidea	53_S186_L007_g10296.t1														putative neurofilament protein h form h2 protein	C:cell; F:electron transfer activity; F:protein disulfide oxidoreductase activity; P:electron transport chain; P:cell redox homeostasis
B. dothidea	53_S186_L007_g10297.t1								AA_permease_2		2.A.3	The_Amino_Acid-Polyamine-Organocation_(APC)_Family	_Electrochemical_Potential-driven_Transporters	2.A.3.4.3	amino acid transporter	C:integral component of membrane; F:transmembrane transporter activity; P:transmembrane transport
B. dothidea	53_S186_L007_g10298.t1														predicted protein
B. dothidea	53_S186_L007_g10299.t1								SUR7		1.H.1	The_Claudin_Tight_Junction_(Claudin1)_Family	_Channels/Pores	1.H.1.4.3	putative sur7 protein	C:plasma membrane; C:integral component of membrane; P:fungal-type cell wall organization; C:membrane raft; C:cell cortex of cell tip
B. dothidea	53_S186_L007_g103.t1								Med18						RNA polymerase II mediator complex subunit Srb5	C:nucleus
B. dothidea	53_S186_L007_g1030.t1								adh_short_C2						short-chain dehydrogenase/reductase family protein	F:oxidoreductase activity; P:oxidation-reduction process
B. dothidea	53_S186_L007_g10300.t1														predicted protein
B. dothidea	53_S186_L007_g10301.t1								DUF2945						hypothetical protein UCRNP2_5606	F:DNA binding
B. dothidea	53_S186_L007_g10302.t1								HET		1.I.1	The_Eukaryotic_Nuclear_Pore_Complex_(E-NPC)_Family	_Channels/Pores	1.I.1.1.3	ran GTPase activating protein 1	F:GTPase activator activity; C:cytoplasm; C:nuclear membrane; P:positive regulation of GTPase activity; P:positive regulation of protein export from nucleus
B. dothidea	53_S186_L007_g10303.t1								COX17						cytochrome c oxidase assembly protein subunit 17	C:mitochondrial intermembrane space; C:cytosol; P:copper ion transport; P:aerobic respiration; P:protein maturation by copper ion transfer; F:copper chaperone activity; P:protein farnesylation; P:mitochondrial respiratory chain complex IV assembly; F:cuprous ion binding
B. dothidea	53_S186_L007_g10305.t1								Ofd1_CTDD;2OG-FeII_Oxy_4						putative fe ii 2-oxoglutarate-dependent dioxygenase protein	F:iron ion binding; C:cytoplasm; P:regulation of translational termination; P:peptidyl-proline hydroxylation; F:L-ascorbic acid binding; F:peptidyl-proline dioxygenase activity; P:oxidation-reduction process
B. dothidea	53_S186_L007_g10307.t1								TauD						Clavaminate synthase-like protein	F:dioxygenase activity; P:oxidation-reduction process
B. dothidea	53_S186_L007_g10308.t1								CBFD_NFYB_HMF						CCAAT-binding factor complex subunit HapC	C:nucleus; P:regulation of transcription, DNA-templated; F:sequence-specific DNA binding; F:protein heterodimerization activity
B. dothidea	53_S186_L007_g10309.t1								Cmc1						UPF0287-domain-containing protein	F:DNA-binding transcription factor activity; C:mitochondrial inner membrane; P:regulation of transcription, DNA-templated
B. dothidea	53_S186_L007_g1031.t1								Fungal_trans_2						C6 transcription factor	F:DNA-binding transcription factor activity, RNA polymerase II-specific; F:DNA binding; C:nucleus; P:regulation of transcription, DNA-templated; P:regulation of transcription by RNA polymerase II; F:zinc ion binding; F:hydrolase activity, acting on ester bonds
B. dothidea	53_S186_L007_g10310.t1								Peptidase_M28	SP(Sec/SPI)					leucyl aminopeptidase	F:aminopeptidase activity; C:extracellular region; P:proteolysis; F:metal ion binding
B. dothidea	53_S186_L007_g10312.t1								3Beta_HSD						C-3 sterol dehydrogenase/C-4 decarboxylase family protein	F:C-3 sterol dehydrogenase (C-4 sterol decarboxylase) activity; F:3-beta-hydroxy-delta5-steroid dehydrogenase activity; F:protein kinase activity; F:ATP binding; C:endoplasmic reticulum; P:protein phosphorylation; P:ergosterol biosynthetic process; C:membrane; P:oxidation-reduction process
B. dothidea	53_S186_L007_g10313.t1														predicted protein	F:molecular_function; C:cellular_component; P:biological_process; C:membrane; C:integral component of membrane
B. dothidea	53_S186_L007_g10317.t1														putative glutathione s-transferase protein	F:aminoacyl-tRNA ligase activity; F:transferase activity
B. dothidea	53_S186_L007_g10318.t1								ZapB;TPR_MLP1_2		1.I.1	The_Eukaryotic_Nuclear_Pore_Complex_(E-NPC)_Family	_Channels/Pores	1.I.1.1.2	nuclear pore complex protein An-Mlp1	C:nuclear pore; P:protein import into nucleus; P:mitotic spindle assembly checkpoint; F:structural constituent of nuclear pore
B. dothidea	53_S186_L007_g10319.t1								TFIIE_beta						transcription initiation factor TFIIE, beta subunit	F:DNA binding; F:translation initiation factor activity; C:transcription factor TFIIE complex; P:transcription initiation from RNA polymerase II promoter; P:translational initiation
B. dothidea	53_S186_L007_g1032.t1								DUF3632						hypothetical protein PTT_00358
B. dothidea	53_S186_L007_g10320.t1									SP(Sec/SPI)
B. dothidea	53_S186_L007_g10321.t1					CE4			Polysacc_deac_1						polysaccharide deacetylase	P:carbohydrate metabolic process; F:hydrolase activity, acting on carbon-nitrogen (but not peptide) bonds
B. dothidea	53_S186_L007_g10322.t1								Amidase		3.A.9	The_Chloroplast_Envelope_Protein_Translocase_(CEPT_or_Tic-Toc)_Family	_Primary_Active_Transporters	3.A.9.1.1	amidase	F:amidase activity
B. dothidea	53_S186_L007_g10323.t1								MFS_1		2.A.1	The_Major_Facilitator_Superfamily_(MFS)	_Electrochemical_Potential-driven_Transporters	2.A.1.3.73	MFS general substrate transporter	C:integral component of membrane; P:transmembrane transport
B. dothidea	53_S186_L007_g10324.t1								Sulfatase;DUF4976						arylsulfatase	F:alanine-tRNA ligase activity; F:ATP binding; P:alanyl-tRNA aminoacylation; F:sulfuric ester hydrolase activity; C:membrane
B. dothidea	53_S186_L007_g10325.t1								tRNA-synt_2c;tRNA_SAD						alanyl-tRNA synthetase	F:alanine-tRNA ligase activity; F:ATP binding; P:alanyl-tRNA aminoacylation; P:regulation of translational fidelity; F:sulfuric ester hydrolase activity
B. dothidea	53_S186_L007_g10326.t1								Oxidored_FMN;Nuc_sug_transp		2.A.7	The_Drug/Metabolite_Transporter_(DMT)_Superfamily	_Electrochemical_Potential-driven_Transporters	2.A.7.12.16	12-oxophytodienoate reductase	F:FMN binding; F:12-oxophytodienoate reductase activity; P:oxidation-reduction process
B. dothidea	53_S186_L007_g10327.t1								DEAD;Helicase_C;Sec63						P-loop containing nucleoside triphosphate hydrolase protein	C:membrane; F:organic cyclic compound binding; F:heterocyclic compound binding
B. dothidea	53_S186_L007_g10328.t1								V_ATPase_I		3.A.2	The_H<sup>+</sup>-_or_Na<sup>+</sup>-translocating_F-type,_V-type_and_A-type_ATPase_(F-ATPase)_Superfamily	_Primary_Active_Transporters	3.A.2.2.4	vacuolar ATP synthase 98 kDa subunit	C:vacuolar proton-transporting V-type ATPase, V0 domain; C:fungal-type vacuole membrane; F:GTP binding; P:ion transport; P:vacuolar acidification; C:integral component of membrane; C:vacuolar proton-transporting V-type ATPase complex; F:proton-transporting ATPase activity, rotational mechanism; F:ATPase binding
B. dothidea	53_S186_L007_g10329.t1								Nucleoporin2;Nup96;Nucleoporin_FG		1.I.1	The_Eukaryotic_Nuclear_Pore_Complex_(E-NPC)_Family	_Channels/Pores	1.I.1.1.2	putative nucleoporin sonb protein	C:nuclear pore; P:nucleocytoplasmic transport; F:structural constituent of nuclear pore
B. dothidea	53_S186_L007_g1033.t1									SP(Sec/SPI)					guanyl-specific ribonuclease f1	F:RNA binding; F:endoribonuclease activity; F:ribonuclease activity; P:RNA phosphodiester bond hydrolysis; P:RNA phosphodiester bond hydrolysis, endonucleolytic
B. dothidea	53_S186_L007_g10330.t1								EF-hand_1;EF-hand_7		1.I.1	The_Eukaryotic_Nuclear_Pore_Complex_(E-NPC)_Family	_Channels/Pores	1.I.1.1.1	putative cell division control protein	F:calcium ion binding; C:spindle pole body; P:cell division
B. dothidea	53_S186_L007_g10331.t1								Complex1_51K;SLBB;NADH_4Fe-4S		3.D.1	The_H<sup>+</sup>_or_Na<sup>+</sup>-translocating_NADH_Dehydrogenase_(NDH)_Family	_Primary_Active_Transporters	3.D.1.6.1	NADH-ubiquinone oxidoreductase 51 kDa subunit	C:mitochondrial inner membrane; F:NADH dehydrogenase (ubiquinone) activity; F:FMN binding; F:metal ion binding; F:NAD binding; F:4 iron, 4 sulfur cluster binding; P:oxidation-reduction process; C:respirasome
B. dothidea	53_S186_L007_g10332.t1										1.G.20	The_Hantavirus_Gc_Envelope_Fusion_Glycoprotein_(Gc-EFG)_Family	_Channels/Pores	1.G.20.2.1	predicted protein
B. dothidea	53_S186_L007_g10333.t1					GH78			Bac_rhamnosid6H;Bac_rhamnosid_C						glycoside hydrolase family 78 protein	F:catalytic activity
B. dothidea	53_S186_L007_g10334.t1								Amidase						amidase signature enzyme	F:amidase activity
B. dothidea	53_S186_L007_g10335.t1									SP(Sec/SPI)
B. dothidea	53_S186_L007_g10336.t1								GFA						putative duf636 domain protein	F:carbon-sulfur lyase activity
B. dothidea	53_S186_L007_g10337.t1								PMSR						peptide-methionine (S)-S-oxide reductase	F:peptide-methionine (S)-S-oxide reductase activity; P:oxidation-reduction process
B. dothidea	53_S186_L007_g10338.t1								JAB;MitMem_reg						26S proteasome regulatory subunit rpn11	F:thiol-dependent ubiquitin-specific protease activity; F:metallopeptidase activity; C:proteasome regulatory particle, lid subcomplex; P:protein deubiquitination; P:proteasome-mediated ubiquitin-dependent protein catabolic process; F:proteasome binding
B. dothidea	53_S186_L007_g10339.t1								Hist_deacetyl						histone deacetylase RpdA/Rpd3	P:negative regulation of transcription by RNA polymerase II; F:transcription coregulator activity; F:histone deacetylase activity; P:negative regulation of chromatin silencing; P:asexual sporulation resulting in formation of a cellular spore; P:mitotic cell cycle phase transition; P:positive regulation of transcription by RNA polymerase II; F:metal ion binding; P:regulation of DNA metabolic proce…
B. dothidea	53_S186_L007_g1034.t1									SP(Sec/SPI)					hypothetical protein FOXG_21060
B. dothidea	53_S186_L007_g10340.t1														putative twin-arginine translocation pathway signal sequence protein
B. dothidea	53_S186_L007_g10341.t1								2-Hacid_dh;2-Hacid_dh_C						D-isomer specific 2-hydroxyacid dehydrogenase	F:oxidoreductase activity, acting on the CH-OH group of donors, NAD or NADP as acceptor; F:NAD binding; P:oxidation-reduction process
B. dothidea	53_S186_L007_g10342.t1								tRNA-synt_2d						phenylalanyl-tRNA synthetase alpha chain	F:tRNA binding; F:aminoacyl-tRNA editing activity; F:phenylalanine-tRNA ligase activity; F:ATP binding; C:cytosol; P:phenylalanyl-tRNA aminoacylation; C:phenylalanine-tRNA ligase complex; P:aminoacyl-tRNA metabolism involved in translational fidelity
B. dothidea	53_S186_L007_g10343.t1														hypothetical protein UCRNP2_4763	C:membrane; C:integral component of membrane
B. dothidea	53_S186_L007_g10344.t1								DUF3405						hypothetical protein UCRNP2_4764	C:integral component of membrane
B. dothidea	53_S186_L007_g10345.t1								SET						SET domain-containing protein
B. dothidea	53_S186_L007_g10346.t1								FMO-like						putative sterigmatocystin biosynthesis monooxygenase stcW	F:N,N-dimethylaniline monooxygenase activity; F:flavin adenine dinucleotide binding; F:NADP binding; P:oxidation-reduction process
B. dothidea	53_S186_L007_g10348.t1								Peptidase_M19						membrane dipeptidase	P:proteolysis; F:metallopeptidase activity; F:dipeptidase activity; P:glycine betaine catabolic process; P:choline catabolic process; F:metal ion binding
B. dothidea	53_S186_L007_g10349.t1									SP(Sec/SPI)					predicted protein	C:membrane
B. dothidea	53_S186_L007_g1035.t1														hypothetical protein EPUS_08835	C:membrane; C:integral component of membrane
B. dothidea	53_S186_L007_g10350.t1								Alk_phosphatase						alkaline phosphatase	C:fungal-type vacuole membrane; F:alkaline phosphatase activity; P:protein dephosphorylation; C:integral component of membrane; P:nicotinamide nucleotide metabolic process; F:fructose-2,6-bisphosphate 6-phosphatase activity
B. dothidea	53_S186_L007_g10351.t1								RNA_pol_Rpc34						DNA-directed RNA polymerase III subunit Rpc34	F:DNA-directed 5'-3' RNA polymerase activity; C:RNA polymerase III complex; P:transcription by RNA polymerase III
B. dothidea	53_S186_L007_g10352.t1								Transp_cyt_pur		2.A.39	The_Nucleobase:Cation_Symporter-1_(NCS1)_Family	_Electrochemical_Potential-driven_Transporters	2.A.39.2.4	purine-cytosine permease	C:plasma membrane; C:integral component of membrane; F:transmembrane transporter activity; P:transmembrane transport
B. dothidea	53_S186_L007_g10353.t1								GIT_SHD						cell polarity protein	C:cell cortex part
B. dothidea	53_S186_L007_g10354.t1								PHD;ING						PHD finger domain protein	F:histone acetyltransferase activity; P:chromatin organization; F:methylated histone binding; C:NuA4 histone acetyltransferase complex
B. dothidea	53_S186_L007_g10355.t1								Hist_deacetyl						histone deacetylase HOS2	C:histone deacetylase complex; F:NAD-dependent histone deacetylase activity (H3-K14 specific); P:positive regulation of transcription by RNA polymerase II; F:metal ion binding; P:histone H3 deacetylation; P:histone H4 deacetylation
B. dothidea	53_S186_L007_g10358.t1								ADH_zinc_N;ADH_N						NAD P-binding protein	F:oxidoreductase activity; F:ligase activity; P:cellular nitrogen compound metabolic process; P:macromolecule metabolic process; P:primary metabolic process; P:oxidation-reduction process
B. dothidea	53_S186_L007_g10359.t1								MFS_1		2.A.1	The_Major_Facilitator_Superfamily_(MFS)	_Electrochemical_Potential-driven_Transporters	2.A.1.2.86	MFS general substrate transporter	C:integral component of membrane; P:transmembrane transport
B. dothidea	53_S186_L007_g1036.t1														hypothetical protein PEX2_007440	C:membrane; C:integral component of membrane
B. dothidea	53_S186_L007_g10361.t1								Zn_clus;Fungal_trans;Peptidase_S28	SP(Sec/SPI)					serine carboxypeptidase s28	F:carboxypeptidase activity; P:regulation of transcription, DNA-templated; P:proteolysis; F:serine-type peptidase activity; F:dipeptidyl-peptidase activity; F:metal ion binding
B. dothidea	53_S186_L007_g10362.t1														putative polyketide synthase protein
B. dothidea	53_S186_L007_g10363.t1								Rick_17kDa_Anti						hypothetical protein UCRNP2_4784
B. dothidea	53_S186_L007_g10364.t1														DUF455 domain protein	P:RNA metabolic process; F:nucleotidyltransferase activity
B. dothidea	53_S186_L007_g10365.t1								cNMP_binding;F-box-like;cNMPbd_u2		1.A.1	The_Voltage-gated_Ion_Channel_(VIC)_Superfamily	_Channels/Pores	1.A.1.5.17	cyclic nucleotide-binding domain-containing protein
B. dothidea	53_S186_L007_g10366.t1								RNase_PH						ribosomal protein S5 domain 2-like protein	C:nuclear exosome (RNase complex); C:cytoplasmic exosome (RNase complex); F:exonuclease activity; C:nucleolus; C:ribosome; P:rRNA catabolic process; P:nuclear-transcribed mRNA catabolic process, exonucleolytic, 3'-5'; P:U4 snRNA 3'-end processing; P:nuclear mRNA surveillance; P:polyadenylation-dependent snoRNA 3'-end processing; P:nucleic acid phosphodiester bond hydrolysis
B. dothidea	53_S186_L007_g10368.t1														putative cell division control protein dna repair exonuclease protein	F:exonuclease activity; P:GPI anchor biosynthetic process; C:integral component of membrane; P:cell division; P:nucleic acid phosphodiester bond hydrolysis
B. dothidea	53_S186_L007_g10369.t1					AA1_3			Cu-oxidase;Cu-oxidase_2;Cu-oxidase_3		2.A.108	The_Iron/Lead_Transporter_(ILT)_Family	_Electrochemical_Potential-driven_Transporters	2.A.108.1.7	putative laccase-1 precursor protein	F:copper ion binding; F:oxidoreductase activity; P:oxidation-reduction process
B. dothidea	53_S186_L007_g1037.t1								Sugar_tr		2.A.1	The_Major_Facilitator_Superfamily_(MFS)	_Electrochemical_Potential-driven_Transporters	2.A.1.1.38	putative sugar transporter stl1 protein	P:carbohydrate transport; C:integral component of membrane; F:transmembrane transporter activity; P:transmembrane transport
B. dothidea	53_S186_L007_g10370.t1								UDPG_MGDP_dh;UDPG_MGDP_dh_N						nucleotide sugar dehydrogenase	P:metabolic process; F:oxidoreductase activity
B. dothidea	53_S186_L007_g10371.t1								Chitin_synth_2						glycosyltransferase family 2 protein	C:integral component of membrane; F:transferase activity, transferring hexosyl groups
B. dothidea	53_S186_L007_g10372.t1								Glyco_hydro_18	SP(Sec/SPI)					glycoside hydrolase family 18 protein	F:hydrolase activity, hydrolyzing O-glycosyl compounds; P:carbohydrate metabolic process
B. dothidea	53_S186_L007_g10373.t1					GH43_6	GH43_6		Glyco_hydro_43	SP(Sec/SPI)					glycoside hydrolase family 43 protein	F:binding; C:extracellular region; P:arabinan catabolic process; F:arabinan endo-1,5-alpha-L-arabinosidase activity; P:hemicellulose catabolic process
B. dothidea	53_S186_L007_g10374.t1								SH3_1						SH3 domain-containing protein
B. dothidea	53_S186_L007_g10375.t1								Ssu72						RNA polymerase II subunit A domain phosphatase SSU72	C:mRNA cleavage and polyadenylation specificity factor complex; P:termination of RNA polymerase II transcription; P:mRNA polyadenylation; F:RNA polymerase II CTD heptapeptide repeat phosphatase activity; P:dephosphorylation of RNA polymerase II C-terminal domain
B. dothidea	53_S186_L007_g10376.t1					GH18			Glyco_hydro_18		9.B.29	The_small_4-5_TMS_Putative_Permease_(4-5PP)_Family	_Incompletely_Characterized_Transport_Systems	9.B.29.2.7	Glycosyl hydrolases family 18 protein	F:hydrolase activity, hydrolyzing O-glycosyl compounds; P:carbohydrate metabolic process; F:chitin binding; P:metabolic process; F:hydrolase activity; F:hydrolase activity, acting on glycosyl bonds
B. dothidea	53_S186_L007_g10377.t1								LysM	SP(Sec/SPI)					LysM domain-containing protein
B. dothidea	53_S186_L007_g10378.t1														predicted protein	F:molecular_function; C:cellular_component; P:biological_process
B. dothidea	53_S186_L007_g10379.t1														hypothetical protein SNOG_12030
B. dothidea	53_S186_L007_g10380.t1		betalactone						Biotin_carb_N;Biotin_lipoyl;Biotin_carb_C;CPSase_L_D2		3.B.1	The_Na<sup>+</sup>-transporting_Carboxylic_Acid_Decarboxylase_(NaT-DC)_Family	_Primary_Active_Transporters	3.B.1.1.5	pyruvate carboxylase subunit A	F:binding
B. dothidea	53_S186_L007_g10381.t1		betalactone						Acyl-CoA_dh_1;Acyl-CoA_dh_M;Acyl-CoA_dh_N						acyl-CoA dehydrogenase	F:DNA-binding transcription factor activity, RNA polymerase II-specific; F:DNA binding; F:acyl-CoA dehydrogenase activity; C:nucleus; P:regulation of transcription by RNA polymerase II; F:zinc ion binding; F:flavin adenine dinucleotide binding; P:oxidation-reduction process
B. dothidea	53_S186_L007_g10382.t1		betalactone						Carboxyl_trans		3.B.1	The_Na<sup>+</sup>-transporting_Carboxylic_Acid_Decarboxylase_(NaT-DC)_Family	_Primary_Active_Transporters	3.B.1.1.2	propionyl-CoA carboxylase beta chain	F:ligase activity
B. dothidea	53_S186_L007_g10384.t1		betalactone						ECH_1						probable enoyl-CoA hydratase, mitochondrial	F:enoyl-CoA hydratase activity; P:fatty acid beta-oxidation; F:isomerase activity
B. dothidea	53_S186_L007_g10385.t1		betalactone						ECH_1;HMGL-like						hydroxymethylglutaryl-CoA lyase	F:hydroxymethylglutaryl-CoA lyase activity; F:methylcrotonoyl-CoA carboxylase activity; F:methylglutaconyl-CoA hydratase activity; P:leucine catabolic process; P:lipid metabolic process; P:ketone body biosynthetic process
B. dothidea	53_S186_L007_g10386.t1		betalactone						ADH_zinc_N;ADH_N						putative alcohol dehydrogenase protein	F:zinc ion binding; F:oxidoreductase activity; P:oxidation-reduction process
B. dothidea	53_S186_L007_g10387.t1		betalactone						COesterase		8.A.117	The_Neuroligin_(Nlg)_Family	_Accessory_Factors_Involved_in_Transport	8.A.117.1.3	putative carboxylesterase family protein	F:structural constituent of ribosome; C:ribosome; P:translation; F:hydrolase activity
B. dothidea	53_S186_L007_g10388.t1		betalactone						Epimerase						putative nadph-dependent methylglyoxal reductase gre2 protein	F:catalytic activity; F:coenzyme binding
B. dothidea	53_S186_L007_g10389.t1														putative sulfatase protein	F:catalytic activity; F:sulfuric ester hydrolase activity
B. dothidea	53_S186_L007_g10391.t1														putative sulfatase protein	F:catalytic activity; F:sulfuric ester hydrolase activity; F:oxidoreductase activity; P:oxidation-reduction process
B. dothidea	53_S186_L007_g10392.t1									SP(Sec/SPI)					extracellular dioxygenase	F:iron ion binding; F:oxidoreductase activity, acting on single donors with incorporation of molecular oxygen, incorporation of two atoms of oxygen; P:oxidation-reduction process
B. dothidea	53_S186_L007_g10393.t1								Aldo_ket_red		8.A.5	The_Voltage-gated_K<sup>+</sup>_Channel_&beta;-subunit_(Kv&beta;)_Family	_Accessory_Factors_Involved_in_Transport	8.A.5.1.6	norsolorinic acid reductase	C:membrane
B. dothidea	53_S186_L007_g10394.t1														putative nacht and ankyrin domain containing protein	C:membrane; C:integral component of membrane; C:eisosome; P:eisosome assembly
B. dothidea	53_S186_L007_g10395.t1								FAD_binding_3	SP(Sec/SPI)					FAD binding domain protein	F:monooxygenase activity; C:cellular_component; C:membrane; C:integral component of membrane; F:oxidoreductase activity; F:salicylate 1-monooxygenase activity; P:oxidation-reduction process; F:FAD binding
B. dothidea	53_S186_L007_g10396.t1								Fungal_trans						predicted protein	F:binding
B. dothidea	53_S186_L007_g10397.t1								ABC_tran;ABC2_membrane;PDR_CDR		3.A.1	The_ATP-binding_Cassette_(ABC)_Superfamily	_Primary_Active_Transporters	3.A.1.205.4	ATP-binding cassette transporter	F:ATP binding; C:plasma membrane; C:integral component of membrane; F:ATPase activity; F:ATPase-coupled transmembrane transporter activity; P:transmembrane transport
B. dothidea	53_S186_L007_g10398.t1								MFS_1		2.A.1	The_Major_Facilitator_Superfamily_(MFS)	_Electrochemical_Potential-driven_Transporters	2.A.1.2.77	MFS general substrate transporter	C:fungal-type vacuole membrane; C:integral component of plasma membrane; P:drug transmembrane transport
B. dothidea	53_S186_L007_g10399.t1					GT90			Glyco_transf_90						glycosyltransferase family 90 protein	C:membrane; C:integral component of membrane; F:transferase activity
B. dothidea	53_S186_L007_g104.t1								PNK3P						polynucleotide kinase 3'-phosphatase	F:double-stranded DNA binding; F:polynucleotide 3'-phosphatase activity; F:ATP-dependent polydeoxyribonucleotide 5'-hydroxyl-kinase activity; P:nucleotide phosphorylation; F:nucleoside monophosphate kinase activity; P:DNA 3' dephosphorylation involved in DNA repair
B. dothidea	53_S186_L007_g1040.t1								zf-U1						U1 small nuclear ribonucleoprotein C	C:commitment complex; P:spliceosomal snRNP assembly; P:mRNA 5'-splice site recognition; F:mRNA binding; C:U1 snRNP; F:zinc ion binding; F:U1 snRNA binding; C:U2-type prespliceosome
B. dothidea	53_S186_L007_g10400.t1								Helicase_RecD;DUF1726;GNAT_acetyltr_2;tRNA_bind_2						N-acetyltransferas-like protein	F:ATP binding; C:nucleolus; C:preribosome, small subunit precursor; P:tRNA acetylation; P:rRNA acetylation involved in maturation of SSU-rRNA; F:rRNA cytidine N-acetyltransferase activity
B. dothidea	53_S186_L007_g10401.t1										9.B.313	The_7_TMS_Domain-containing_Protein_(7DCP)_Family	_Incompletely_Characterized_Transport_Systems	9.B.313.1.2	integral membrane family protein	C:integral component of membrane
B. dothidea	53_S186_L007_g10402.t1								Fungal_trans						Zn(II)2Cys6 transcription factor	F:DNA binding; P:regulation of transcription by RNA polymerase II
B. dothidea	53_S186_L007_g10403.t1								CN_hydrolase						Cyanide hydratase	F:nitrilase activity; P:cyanide catabolic process; F:cyanide hydratase activity; F:indole-3-acetonitrile nitrile hydratase activity
B. dothidea	53_S186_L007_g10404.t1														hypothetical protein ARB_00540
B. dothidea	53_S186_L007_g10405.t1									SP(Sec/SPI)
B. dothidea	53_S186_L007_g10407.t1								Dioxygenase_C	SP(Sec/SPI)					putative protocatechuate -dioxygenase beta subunit protein	P:cellular aromatic compound metabolic process; F:ferric iron binding; F:oxidoreductase activity, acting on single donors with incorporation of molecular oxygen, incorporation of two atoms of oxygen; P:oxidation-reduction process
B. dothidea	53_S186_L007_g10408.t1								ADH_zinc_N;ADH_N						chlorophyll synthesis pathway protein BchC	F:zinc ion binding; C:integral component of membrane; F:oxidoreductase activity; F:transmembrane transporter activity; P:transmembrane transport; P:oxidation-reduction process
B. dothidea	53_S186_L007_g10409.t1										2.A.1	The_Major_Facilitator_Superfamily_(MFS)	_Electrochemical_Potential-driven_Transporters	2.A.1.7.25	putative integral membrane protein	C:integral component of membrane
B. dothidea	53_S186_L007_g1041.t1														predicted protein
B. dothidea	53_S186_L007_g10410.t1					GH43_1			Glyco_hydro_43						xylan 1,4-beta-xylosidase	P:carbohydrate metabolic process; F:xylan 1,4-beta-xylosidase activity
B. dothidea	53_S186_L007_g10411.t1								UbiA						UbiA prenyltransferase	C:membrane; C:integral component of membrane; F:transferase activity; F:transferase activity, transferring alkyl or aryl (other than methyl) groups
B. dothidea	53_S186_L007_g10412.t1														hypothetical protein EPUS_04807
B. dothidea	53_S186_L007_g10414.t1														hypothetical protein W97_02119	C:membrane; C:integral component of membrane
B. dothidea	53_S186_L007_g10415.t1								ADH_zinc_N;ADH_N						zeta-crystallin	F:binding; P:regulation of transcription, DNA-templated
B. dothidea	53_S186_L007_g10416.t1									SP(Sec/SPI)					putative cellulose-binding family ii protein	C:extracellular region; P:carbohydrate metabolic process; F:cellulose binding
B. dothidea	53_S186_L007_g10417.t1														putative zn2+-binding protein melusin contains chord domain protein
B. dothidea	53_S186_L007_g1042.t1								Isochorismatase;GST_C_2;2OG-FeII_Oxy_2						putative isochorismatase family protein family protein	F:catalytic activity
B. dothidea	53_S186_L007_g10420.t1								Peptidase_M13;Peptidase_M13_N						putative endothelin-converting enzyme protein	F:metallopeptidase activity
B. dothidea	53_S186_L007_g10421.t1								Iso_dh;Transferase;TRP;TRP_N		1.A.4	The_Transient_Receptor_Potential_Ca<sup>2+</sup>_Channel_(TRP-CC)_Family	_Channels/Pores	1.A.4.9.3	tartrate dehydrogenase	F:magnesium ion binding; C:membrane; F:oxidoreductase activity, acting on the CH-OH group of donors, NAD or NADP as acceptor; F:tartrate decarboxylase activity; F:NAD binding; P:oxidation-reduction process
B. dothidea	53_S186_L007_g10424.t1														putative c6 zinc finger domain containing protein	F:DNA-binding transcription factor activity, RNA polymerase II-specific; C:nucleus; P:regulation of transcription by RNA polymerase II; F:zinc ion binding
B. dothidea	53_S186_L007_g10425.t1								Zn_clus;Fungal_trans						putative fungal specific transcription factor domain-containing protein	F:DNA-binding transcription factor activity, RNA polymerase II-specific; F:DNA binding; C:nucleus; P:regulation of transcription by RNA polymerase II; F:zinc ion binding
B. dothidea	53_S186_L007_g10426.t1								Amidohydro_1						putative amidohydrolase domain containing protein	F:hydrolase activity, acting on carbon-nitrogen (but not peptide) bonds
B. dothidea	53_S186_L007_g10427.t1								COesterase		8.A.117	The_Neuroligin_(Nlg)_Family	_Accessory_Factors_Involved_in_Transport	8.A.117.1.3	putative carboxylesterase family protein	F:hydrolase activity
B. dothidea	53_S186_L007_g10428.t1								Abhydrolase_1;FAD_binding_3						putative hydrolase	F:catalytic activity
B. dothidea	53_S186_L007_g10429.t1								COesterase		8.A.117	The_Neuroligin_(Nlg)_Family	_Accessory_Factors_Involved_in_Transport	8.A.117.1.1	acetylcholinesterase isoform X1	F:hydrolase activity
B. dothidea	53_S186_L007_g1043.t1								SRAP						DUF159-domain-containing protein
B. dothidea	53_S186_L007_g10430.t1								DUF3433						hypothetical protein UCRNP2_9899	C:membrane
B. dothidea	53_S186_L007_g10431.t1								NmrA						NmrA family transcriptional regulator
B. dothidea	53_S186_L007_g10432.t1								Tyrosinase	SP(Sec/SPI)					putative tyrosinase central domain protein	F:oxidoreductase activity; F:metal ion binding; P:oxidation-reduction process
B. dothidea	53_S186_L007_g10433.t1								CAP	SP(Sec/SPI)	8.B.9	The_Triflin_Toxin_(Triflin_or_CRISP)_Family	_Accessory_Factors_Involved_in_Transport	8.B.9.1.3	putative allergen v5 tpx-1-related protein	C:extracellular region; P:sterol transport; F:sterol binding
B. dothidea	53_S186_L007_g10434.t1								Kdo						putative kinase suppressor of ras 2 protein	F:protein kinase activity; F:ATP binding; P:protein phosphorylation; F:kinase activity; P:phosphorylation
B. dothidea	53_S186_L007_g10435.t1								K_oxygenase						putative flavin-containing monooxygenase protein	F:monooxygenase activity; P:oxidation-reduction process
B. dothidea	53_S186_L007_g10436.t1								FMN_dh	SP(Sec/SPI)					cytochrome b2	F:FMN binding; F:oxidoreductase activity; P:oxidation-reduction process
B. dothidea	53_S186_L007_g10438.t1								ABC_tran;ABC2_membrane;PDR_CDR;ABC_trans_N		3.A.1	The_ATP-binding_Cassette_(ABC)_Superfamily	_Primary_Active_Transporters	3.A.1.205.3	ABC-2 type transporter	F:ATP binding; C:integral component of membrane; F:ATPase activity; F:ATPase-coupled transmembrane transporter activity; P:transmembrane transport
B. dothidea	53_S186_L007_g10439.t1									SP(Sec/SPI)					hypothetical protein UCRNP2_6936
B. dothidea	53_S186_L007_g1044.t1														putative tpr domain-containing protein	C:integral component of membrane
B. dothidea	53_S186_L007_g10441.t1					GH1			Glyco_hydro_1		8.A.49	The_Klotho_Auxiliary_Protein_(Klotho)_Family	_Accessory_Factors_Involved_in_Transport	8.A.49.1.2	glycoside hydrolase family 1 protein	F:hydrolase activity
B. dothidea	53_S186_L007_g10442.t1								CHAT						tetratricopeptide repeat protein	F:zinc ion binding; F:oxidoreductase activity; F:metal ion binding; P:oxidation-reduction process
B. dothidea	53_S186_L007_g10444.t1								Aldo_ket_red		8.A.5	The_Voltage-gated_K<sup>+</sup>_Channel_&beta;-subunit_(Kv&beta;)_Family	_Accessory_Factors_Involved_in_Transport	8.A.5.1.4	Pyridoxal reductase	F:molecular_function; P:biological_process
B. dothidea	53_S186_L007_g10445.t1								GMC_oxred_C						glucose oxidase	F:oxidoreductase activity
B. dothidea	53_S186_L007_g10446.t1														hypothetical protein AURDEDRAFT_147021
B. dothidea	53_S186_L007_g10447.t1									SP(Sec/SPI)					hypothetical protein AURDEDRAFT_173402	P:proteolysis; F:metallopeptidase activity
B. dothidea	53_S186_L007_g10448.t1								AA_permease_2		2.A.3	The_Amino_Acid-Polyamine-Organocation_(APC)_Family	_Electrochemical_Potential-driven_Transporters	2.A.3.4.6	amino acid transporter	C:integral component of membrane; F:transmembrane transporter activity; P:transmembrane transport
B. dothidea	53_S186_L007_g1045.t1								NmrA						isoflavone reductase	C:membrane; C:integral component of membrane
B. dothidea	53_S186_L007_g10450.t1					AA3_2|AA3_2	AA3_2|AA3_2		GMC_oxred_N;GMC_oxred_C	SP(Sec/SPI)					putative gmc oxidoreductase protein	F:oxidoreductase activity, acting on CH-OH group of donors; F:flavin adenine dinucleotide binding; P:oxidation-reduction process
B. dothidea	53_S186_L007_g10451.t1								AAA						putative aaa family atpase protein	F:DNA-binding transcription factor activity, RNA polymerase II-specific; F:ATP binding; C:nucleus; P:regulation of transcription, DNA-templated; P:regulation of transcription by RNA polymerase II; F:zinc ion binding; F:hydrolase activity
B. dothidea	53_S186_L007_g10452.t1														C2H2 transcription factor	F:nucleic acid binding; F:DNA binding; C:nucleus; P:transcription, DNA-templated; F:zinc ion binding; C:membrane; C:integral component of membrane
B. dothidea	53_S186_L007_g10453.t1								ABM						Antibiotic biosynthesis monooxygenase	F:monooxygenase activity; P:oxidation-reduction process
B. dothidea	53_S186_L007_g10454.t1								ADH_N						alcohol dehydrogenase	P:metabolic process; F:oxidoreductase activity; F:metal ion binding
B. dothidea	53_S186_L007_g10455.t1								Aminotran_3		9.B.313	The_7_TMS_Domain-containing_Protein_(7DCP)_Family	_Incompletely_Characterized_Transport_Systems	9.B.313.1.2	acetylornithine aminotransferase	F:transaminase activity; F:pyridoxal phosphate binding
B. dothidea	53_S186_L007_g10456.t1								SBP56						putative 56kda selenium binding protein	F:selenium binding
B. dothidea	53_S186_L007_g10457.t1								MFS_1						MFS general substrate transporter	C:integral component of membrane
B. dothidea	53_S186_L007_g10458.t1								HET						HET-domain-containing protein
B. dothidea	53_S186_L007_g10459.t1					AA1_3	AA1_3		Cu-oxidase;Cu-oxidase_2;Cu-oxidase_3	SP(Sec/SPI)	2.A.108	The_Iron/Lead_Transporter_(ILT)_Family	_Electrochemical_Potential-driven_Transporters	2.A.108.1.4	multicopper oxidase	F:copper ion binding; F:oxidoreductase activity; P:oxidation-reduction process
B. dothidea	53_S186_L007_g1046.t1								NDUFA12						putative nadh:ubiquinone oxidoreductase subunit protein	C:mitochondrial inner membrane; F:NADH dehydrogenase (ubiquinone) activity; F:electron transfer activity; P:electron transport chain; C:respirasome
B. dothidea	53_S186_L007_g10460.t1									SP(Sec/SPI)					putative cytochrome p450 protein
B. dothidea	53_S186_L007_g10461.t1								DHO_dh						dihydroorotate dehydrogenase	P:pyrimidine nucleotide biosynthetic process; F:oxidoreductase activity, acting on the CH-CH group of donors
B. dothidea	53_S186_L007_g10462.t1								ADH_N						alcohol dehydrogenase	F:alcohol dehydrogenase (NAD) activity; C:cytoplasm; P:ethanol metabolic process; P:NADH oxidation; F:zinc ion binding; C:integral component of membrane; F:hydrolase activity
B. dothidea	53_S186_L007_g10463.t1								4HBT						thioesterase family protein	C:membrane; F:kinase activity; P:cellular metabolic process
B. dothidea	53_S186_L007_g10465.t1														putative phd finger domain-containing protein	F:metal ion binding
B. dothidea	53_S186_L007_g10466.t1								Ion_trans;GPHH		1.A.1	The_Voltage-gated_Ion_Channel_(VIC)_Superfamily	_Channels/Pores	1.A.1.11.17	calcium-channel protein CCH1	C:voltage-gated sodium channel complex; F:voltage-gated calcium channel activity; F:voltage-gated sodium channel activity; F:calcium ion binding; C:voltage-gated calcium channel complex; P:regulation of ion transmembrane transport; P:calcium ion transmembrane transport; P:membrane depolarization during action potential
B. dothidea	53_S186_L007_g10467.t1														hypothetical protein UCRNP2_5591
B. dothidea	53_S186_L007_g10468.t1														zinc finger protein 513-like
B. dothidea	53_S186_L007_g10469.t1					GH31			Glyco_hydro_31						glycoside hydrolase family 31 protein	F:hydrolase activity, hydrolyzing O-glycosyl compounds; P:carbohydrate metabolic process; F:carbohydrate binding
B. dothidea	53_S186_L007_g1047.t1								CH						putative calponin protein
B. dothidea	53_S186_L007_g10470.t1								Form_Nir_trans		1.A.16	The_Formate-Nitrite_Transporter_(FNT)_Family	_Channels/Pores	1.A.16.2.2	formate/nitrite transporter family protein, putative	C:integral component of plasma membrane; F:formate transmembrane transporter activity; F:high-affinity secondary active nitrite transmembrane transporter activity; P:nitrate transport; P:nitrite transport; P:formate transport; P:transmembrane transport
B. dothidea	53_S186_L007_g10471.t1								UPF0029						putative formate nitrite transporter family protein	C:integral component of membrane; F:transmembrane transporter activity; P:transmembrane transport
B. dothidea	53_S186_L007_g10472.t1								HAT;TPR_17;TPR_19						pre-mRNA-splicing factor CLF1	P:cis assembly of pre-catalytic spliceosome; C:chromatin; C:Prp19 complex; F:chromatin binding; F:DNA replication origin binding; P:DNA replication initiation; C:U2-type prespliceosome; C:U2-type catalytic step 1 spliceosome; C:U2-type catalytic step 2 spliceosome; C:U2-type post-mRNA release spliceosomal complex
B. dothidea	53_S186_L007_g10473.t1		NRPS						Nop;Prp31_C						Prp31 C terminal domain-containing protein	P:spliceosomal tri-snRNP complex assembly; C:U4 snRNP; P:mRNA cis splicing, via spliceosome; C:U4/U6 x U5 tri-snRNP complex
B. dothidea	53_S186_L007_g10474.t1		NRPS												hypothetical protein CC84DRAFT_1160181
B. dothidea	53_S186_L007_g10475.t1		NRPS						CBFD_NFYB_HMF						histone-fold-containing protein	C:nucleus; F:protein heterodimerization activity
B. dothidea	53_S186_L007_g10476.t1		NRPS						DUF1749						siderophore biosynthesis lipase/esterase, putative	F:hydrolase activity
B. dothidea	53_S186_L007_g10477.t1		NRPS						MFS_1		2.A.1	The_Major_Facilitator_Superfamily_(MFS)	_Electrochemical_Potential-driven_Transporters	2.A.1.16.8	siderophore iron transporter mirB	C:integral component of plasma membrane; P:cellular response to iron ion starvation; P:transmembrane transport
B. dothidea	53_S186_L007_g10478.t1		NRPS						ABC_tran;ABC_membrane		3.A.1	The_ATP-binding_Cassette_(ABC)_Superfamily	_Primary_Active_Transporters	3.A.1.201.1	ABC multidrug transporter SitT	F:ATP binding; P:drug transmembrane transport; F:ATPase-coupled xenobiotic transmembrane transporter activity; C:integral component of membrane; F:ATPase activity; F:ATPase-coupled transmembrane transporter activity; P:xenobiotic transport
B. dothidea	53_S186_L007_g10479.t1		NRPS						Acetyltransf_8						acetyltransferase SidF	F:N-acyltransferase activity
B. dothidea	53_S186_L007_g10480.t1		NRPS						ECH_1						Enoyl-CoA hydratase/isomerase family protein	F:enoyl-CoA hydratase activity; C:mitochondrion; P:fatty acid beta-oxidation; F:isomerase activity
B. dothidea	53_S186_L007_g10481.t1		NRPS						AMP-binding;PP-binding;Condensation		4.C.1	The_Fatty_Acid_Transporter_(FAT)_Family	_Group_Translocators	4.C.1.1.4	nonribosomal siderophore peptide synthase Sid2	F:catalytic activity; C:cytoplasm; P:ergosterol biosynthetic process; P:cellular response to iron ion starvation; F:phosphopantetheine binding; P:amino acid activation for nonribosomal peptide biosynthetic process; P:N',N'',N'''-triacetylfusarinine C biosynthetic process
B. dothidea	53_S186_L007_g10482.t1		NRPS												pantetheine-phosphate adenylyltransferase family protein	F:catalytic activity; F:dephospho-CoA kinase activity; P:biosynthetic process; P:coenzyme A biosynthetic process; P:phosphorylation; F:transferase activity; F:nucleotidyltransferase activity
B. dothidea	53_S186_L007_g10483.t1		NRPS						GLTT	SP(Sec/SPI)	3.A.7	The_Type_IV_(Conjugal_DNA-Protein_Transfer_or_VirB)_Secretory_Pathway_(IVSP)_Family	_Primary_Active_Transporters	3.A.7.9.1	putative a2 protein	C:membrane part; C:cell part
B. dothidea	53_S186_L007_g10484.t1										8.A.110	The_Junctophilin_(JP)_Family	_Accessory_Factors_Involved_in_Transport	8.A.110.1.3	predicted protein
B. dothidea	53_S186_L007_g10485.t1								Zn_clus						putative c6 finger domain protein	F:DNA-binding transcription factor activity, RNA polymerase II-specific; C:nucleus; P:regulation of transcription by RNA polymerase II; F:zinc ion binding
B. dothidea	53_S186_L007_g10486.t1								2-Hacid_dh_C						glyoxylate reductase	C:cytosol; P:glyoxylate catabolic process; F:hydroxypyruvate reductase activity; F:glyoxylate reductase (NADP) activity; F:protein homodimerization activity; F:glyoxylate reductase activity; F:NAD binding; P:oxidation-reduction process
B. dothidea	53_S186_L007_g10487.t1								AA_permease		2.A.3	The_Amino_Acid-Polyamine-Organocation_(APC)_Family	_Electrochemical_Potential-driven_Transporters	2.A.3.10.14	amino acid permease	P:amino acid transport; C:integral component of membrane; F:transmembrane transporter activity; P:transmembrane transport
B. dothidea	53_S186_L007_g10488.t1								adh_short						oxidoreductase, short-chain dehydrogenase/reductase family	F:iron ion binding; F:oxidoreductase activity, acting on paired donors, with incorporation or reduction of molecular oxygen; F:heme binding; P:oxidation-reduction process
B. dothidea	53_S186_L007_g10489.t1														epoxide hydrolase	F:hydrolase activity
B. dothidea	53_S186_L007_g1049.t1														hypothetical protein UCRNP2_7144	C:nascent polypeptide-associated complex
B. dothidea	53_S186_L007_g10491.t1								ADH_zinc_N						alcohol dehydrogenase	C:integral component of membrane; F:oxidoreductase activity; P:oxidation-reduction process
B. dothidea	53_S186_L007_g10492.t1								Palm_thioest	SP(Sec/SPI)					palmitoyl protein thioesterase	P:protein depalmitoylation; C:lysosome; F:palmitoyl-(protein) hydrolase activity
B. dothidea	53_S186_L007_g10493.t1								Zn_clus;Fungal_trans						Zn(II)2Cys6 transcription factor	P:regulation of transcription, DNA-templated; C:membrane; F:metal ion binding
B. dothidea	53_S186_L007_g10494.t1								FAD_binding_2						FAD binding domain-containing protein
B. dothidea	53_S186_L007_g10495.t1								Glyoxal_oxid_N;DUF1929						galactose oxidase	F:chitin binding; C:membrane; C:integral component of membrane
B. dothidea	53_S186_L007_g10496.t1								CHCH		3.A.8	The_Mitochondrial_Protein_Translocase_(MPT)_Family	_Primary_Active_Transporters	3.A.8.1.1	intermembrane space import and assembly protein 40	C:mitochondrial intermembrane space; F:protein disulfide oxidoreductase activity; C:membrane; P:protein maturation by protein folding; P:protein import into mitochondrial intermembrane space
B. dothidea	53_S186_L007_g10497.t1								DUF5353		9.B.235	The_Mitochondrial_Outer_Membrane_Protein-14_(Om14)_Family	_Incompletely_Characterized_Transport_Systems	9.B.235.1.8	pyruvate dehydrogenase dihydrolipoamide acetyltransferase component	C:integral component of membrane
B. dothidea	53_S186_L007_g10499.t1					GH20	GH20		Glyco_hydro_20;Glyco_hydro_20b	SP(Sec/SPI)					Glycosyl hydrolase family 20	F:beta-N-acetylhexosaminidase activity; P:carbohydrate metabolic process
B. dothidea	53_S186_L007_g105.t1														putative only prolin and serin are matching in the corresponding protein
B. dothidea	53_S186_L007_g10500.t1														hypothetical protein UCRNP2_8716
B. dothidea	53_S186_L007_g10501.t1								Chromosome_seg;DUF4210						hypothetical protein CC84DRAFT_1164368
B. dothidea	53_S186_L007_g10502.t1					GH106	GH106		Glyco_hydro_2_N;Glyco_hydro_106	SP(Sec/SPI)					putative secreted protein
B. dothidea	53_S186_L007_g10503.t1								FAD_binding_3						monooxygenase FAD-binding protein	F:monooxygenase activity; C:cellular_component; C:membrane; C:integral component of membrane; F:oxidoreductase activity; P:oxidation-reduction process; F:FAD binding
B. dothidea	53_S186_L007_g10504.t1								MFS_1		2.A.1	The_Major_Facilitator_Superfamily_(MFS)	_Electrochemical_Potential-driven_Transporters	2.A.1.2.86	Major facilitator superfamily transporter	C:membrane; C:integral component of membrane; P:transmembrane transport
B. dothidea	53_S186_L007_g10505.t1														hypothetical protein H072_2636	C:membrane; C:integral component of membrane
B. dothidea	53_S186_L007_g10506.t1								MCM;MCM_N;MCM_OB						DNA replication licensing factor mcm3	F:DNA binding; F:helicase activity; F:ATP binding; C:nucleus; P:DNA replication initiation; C:MCM complex
B. dothidea	53_S186_L007_g10508.t1								SnoaL_2	SP(Sec/SPI)					Snoal-like polyketide cyclase family protein	F:molecular_function; C:cellular_component; P:biological_process; C:membrane; C:integral component of membrane
B. dothidea	53_S186_L007_g10509.t1								NmrA						putative -like family protein	F:molecular_function; C:cellular_component; P:biological_process; F:oxidoreductase activity; F:2'-hydroxyisoflavone reductase activity; P:oxidation-reduction process
B. dothidea	53_S186_L007_g1051.t1								Gln-synt_C;Gln-synt_N						glutamine synthetase	F:glutamate-ammonia ligase activity; F:ATP binding; P:glutamine biosynthetic process; P:ammonia assimilation cycle
B. dothidea	53_S186_L007_g10510.t1								HET						putative cytochrome p450 pisatin protein	F:iron ion binding; F:oxidoreductase activity, acting on paired donors, with incorporation or reduction of molecular oxygen; F:heme binding; P:oxidation-reduction process
B. dothidea	53_S186_L007_g10511.t1														2OG-Fe(II) oxygenase superfamily domain-containing protein
B. dothidea	53_S186_L007_g10512.t1										9.B.313	The_7_TMS_Domain-containing_Protein_(7DCP)_Family	_Incompletely_Characterized_Transport_Systems	9.B.313.1.3	cation-transporting atpase 4	C:membrane
B. dothidea	53_S186_L007_g10513.t1								Amidase						amidase family protein	F:hydrolase activity
B. dothidea	53_S186_L007_g10514.t1								Dioxygenase_C	SP(Sec/SPI)					protocatechuate 3	F:iron ion binding; F:oxidoreductase activity, acting on single donors with incorporation of molecular oxygen, incorporation of two atoms of oxygen; P:oxidation-reduction process
B. dothidea	53_S186_L007_g10515.t1								Lactamase_B						metallo-beta-lactamase superfamily protein	F:hydrolase activity
B. dothidea	53_S186_L007_g10516.t1								NmrA						NmrA-like family protein	F:oxidoreductase activity, acting on the aldehyde or oxo group of donors, NAD or NADP as acceptor; F:NAD binding; P:oxidation-reduction process
B. dothidea	53_S186_L007_g10517.t1								MFS_1		2.A.1	The_Major_Facilitator_Superfamily_(MFS)	_Electrochemical_Potential-driven_Transporters	2.A.1.2.86	MFS general substrate transporter	C:integral component of plasma membrane; P:drug transmembrane transport
B. dothidea	53_S186_L007_g10518.t1								2-Hacid_dh;2-Hacid_dh_C						D-3-phosphoglycerate dehydrogenase	C:cytosol; F:hydroxypyruvate reductase activity; F:glyoxylate reductase (NADP) activity; F:protein homodimerization activity; F:NAD binding; P:oxidation-reduction process
B. dothidea	53_S186_L007_g10519.t1								2OG-FeII_Oxy;DIOX_N						2OG-Fe(II)oxygenase superfamily protein	F:metal ion binding; F:dioxygenase activity; P:oxidation-reduction process
B. dothidea	53_S186_L007_g1052.t1								RCR	SP(Sec/SPI)					hypothetical protein UCRNP2_3626	C:membrane; C:integral component of membrane
B. dothidea	53_S186_L007_g10520.t1								AAA		9.B.307	The_FtsH_AAA(+)_Zinc_Metaloprotease_(FtsH)_Family	_Incompletely_Characterized_Transport_Systems	9.B.307.1.2	P-loop containing nucleoside triphosphate hydrolase protein	F:ATP binding
B. dothidea	53_S186_L007_g10521.t1								TauD						alpha-ketoglutarate dependent xanthine dioxygenase	F:dioxygenase activity; P:oxidation-reduction process
B. dothidea	53_S186_L007_g10522.t1								TauD						alpha-ketoglutarate dependent xanthine dioxygenase	F:dioxygenase activity; P:oxidation-reduction process
B. dothidea	53_S186_L007_g10523.t1														putative c6 zinc finger domain containing protein	F:ion binding
B. dothidea	53_S186_L007_g10525.t1					GT31			Fringe						glycosyltransferase family 31 protein	C:integral component of membrane; F:transferase activity, transferring glycosyl groups
B. dothidea	53_S186_L007_g10526.t1								Chitin_synth_2		4.D.1	The_Putative_Vectorial_Glycosyl_Polymerization_(VGP)_Family	_Group_Translocators	4.D.1.1.10	hyaluronan synthase	P:cellular process; C:integral component of membrane; F:transferase activity
B. dothidea	53_S186_L007_g10527.t1														hypothetical protein LY89DRAFT_680019
B. dothidea	53_S186_L007_g10528.t1								Methyltransf_25						methyltransferase domain-containing protein	F:transferase activity
B. dothidea	53_S186_L007_g1053.t1								Tfb5						RNA polymerase II transcription factor B subunit 5	C:transcription factor TFIIH core complex; C:transcription factor TFIIH holo complex; C:cytosol; P:nucleotide-excision repair; P:phosphorylation of RNA polymerase II C-terminal domain
B. dothidea	53_S186_L007_g10530.t1								ADH_zinc_N;PP-binding;Acyl_transf_1;ADH_N;Methyltransf_12;KR;PS-DH						Thiolase-like protein	P:metabolic process; F:transferase activity
B. dothidea	53_S186_L007_g10531.t1														putative duf300 domain protein	C:membrane; C:integral component of membrane
B. dothidea	53_S186_L007_g10532.t1														integral membrane protein
B. dothidea	53_S186_L007_g10534.t1								Aldo_ket_red		8.A.5	The_Voltage-gated_K<sup>+</sup>_Channel_&beta;-subunit_(Kv&beta;)_Family	_Accessory_Factors_Involved_in_Transport	8.A.5.1.6	aldo-keto reductase yakc	C:cellular_component; P:biological_process; F:oxidoreductase activity; P:oxidation-reduction process
B. dothidea	53_S186_L007_g10535.t1								MFS_1		2.A.1	The_Major_Facilitator_Superfamily_(MFS)	_Electrochemical_Potential-driven_Transporters	2.A.1.16.7	siderochrome-iron transporter	C:integral component of plasma membrane; P:ion transport; P:iron ion homeostasis; P:transmembrane transport
B. dothidea	53_S186_L007_g10536.t1								MFS_1		2.A.1	The_Major_Facilitator_Superfamily_(MFS)	_Electrochemical_Potential-driven_Transporters	2.A.1.3.73	MFS drug transporter	F:catalytic activity; C:integral component of plasma membrane; P:signal transduction; P:primary metabolic process; P:transmembrane transport; P:organic substance metabolic process
B. dothidea	53_S186_L007_g10538.t1														glycoside hydrolase family 79 protein	F:molecular_function; F:beta-glucuronidase activity; C:cellular_component; C:extracellular region; P:biological_process; P:metabolic process; F:hydrolase activity; F:hydrolase activity, acting on glycosyl bonds
B. dothidea	53_S186_L007_g10539.t1														putative upf0643 protein	F:molecular_function; C:cellular_component; P:biological_process
B. dothidea	53_S186_L007_g1054.t1								GFA						putative glutathione-dependent formaldehyde-activating protein	F:carbon-sulfur lyase activity
B. dothidea	53_S186_L007_g10540.t1										2.A.1	The_Major_Facilitator_Superfamily_(MFS)	_Electrochemical_Potential-driven_Transporters	2.A.1.48.4	MFS general substrate transporter	C:integral component of membrane
B. dothidea	53_S186_L007_g10541.t1										9.B.313	The_7_TMS_Domain-containing_Protein_(7DCP)_Family	_Incompletely_Characterized_Transport_Systems	9.B.313.1.4	putative cfem domain-containing protein	C:integral component of membrane
B. dothidea	53_S186_L007_g10542.t1								Ceramidase						alkaline ceramidase family protein	P:ceramide metabolic process; C:integral component of membrane; F:hydrolase activity, acting on carbon-nitrogen (but not peptide) bonds, in linear amides
B. dothidea	53_S186_L007_g10543.t1								Transketolase_N;Transket_pyr;Transketolase_C						transketolase	F:transketolase activity; F:metal ion binding
B. dothidea	53_S186_L007_g10544.t1								DUF543						DUF543-domain-containing protein	C:MICOS complex
B. dothidea	53_S186_L007_g10545.t1								Urb2						putative nucleolar 27s pre-rrna processing urb2 npa2 protein	F:molecular_function; C:cellular_component; C:nucleolus; P:biological_process; P:ribosome biogenesis
B. dothidea	53_S186_L007_g10546.t1														hypothetical protein UCRNP2_8543	F:molecular_function; C:cellular_component; P:biological_process
B. dothidea	53_S186_L007_g10547.t1								Xan_ur_permease		2.A.40	The_Nucleobase/Ascorbate_Transporter_(NAT)_or_Nucleobase:Cation_Symporter-2_(NCS2)_Family	_Electrochemical_Potential-driven_Transporters	2.A.40.7.1	purine transporter	F:purine nucleobase transmembrane transporter activity; C:plasma membrane; P:adenine transport; P:guanine transport; C:integral component of membrane; P:transmembrane transport
B. dothidea	53_S186_L007_g10548.t1								Ebp2						Ebp2-domain-containing protein	C:nucleolus; P:rRNA processing; C:preribosome, large subunit precursor; C:nuclear periphery; P:ribosomal large subunit biogenesis
B. dothidea	53_S186_L007_g10549.t1								Transp_cyt_pur		2.A.39	The_Nucleobase:Cation_Symporter-1_(NCS1)_Family	_Electrochemical_Potential-driven_Transporters	2.A.39.3.7	uracil permease	C:plasma membrane; F:nucleobase transmembrane transporter activity; P:nucleobase transport; C:integral component of membrane; P:transmembrane transport
B. dothidea	53_S186_L007_g1055.t1								WD40		8.A.92	The_G-Protein_Î±Î_Î__Complex_(GPC)_Family	_Accessory_Factors_Involved_in_Transport	8.A.92.1.4	WD40 repeat-like protein	F:magnesium ion binding; P:positive regulation of protein phosphorylation; F:catalytic activity; F:protein kinase C binding; C:nucleus; C:cytosolic small ribosomal subunit; F:thiamine pyrophosphate binding; P:cellular response to amino acid starvation; P:cellular response to drug; F:ribosome binding; P:positive regulation of cleistothecium development; P:rescue of stalled ribosome; P:cellular res…
B. dothidea	53_S186_L007_g10550.t1								Fungal_trans_2						acriflavine sensitivity control protein acr-2	F:DNA-binding transcription factor activity, RNA polymerase II-specific; C:nucleus; P:regulation of transcription, DNA-templated; P:regulation of transcription by RNA polymerase II; F:zinc ion binding
B. dothidea	53_S186_L007_g10551.t1								Cupin_2						cupin domain-containing protein	F:molecular_function; C:cellular_component; P:biological_process
B. dothidea	53_S186_L007_g10552.t1								PEP_mutase						carboxyphosphonoenolpyruvate phosphonomutase, putative	F:kinase activity; P:phosphorylation; F:hydrolase activity; F:methylisocitrate lyase activity
B. dothidea	53_S186_L007_g10554.t1														predicted protein	C:membrane; C:integral component of membrane
B. dothidea	53_S186_L007_g10555.t1								MFS_1		2.A.1	The_Major_Facilitator_Superfamily_(MFS)	_Electrochemical_Potential-driven_Transporters	2.A.1.3.73	putative mfs transporter protein	C:membrane; C:integral component of membrane; P:transmembrane transport
B. dothidea	53_S186_L007_g10557.t1								Transferase						putative anthranilate n-benzoyltransferase protein	F:transferase activity, transferring acyl groups other than amino-acyl groups
B. dothidea	53_S186_L007_g10558.t1								ELO						elongation of fatty acids protein 3	F:fatty acid elongase activity; P:fatty acid elongation, saturated fatty acid; P:sphingolipid biosynthetic process; C:integral component of endoplasmic reticulum membrane; P:fatty acid elongation, monounsaturated fatty acid; P:fatty acid elongation, polyunsaturated fatty acid; P:very long-chain fatty acid biosynthetic process; F:3-oxo-arachidoyl-CoA synthase activity; F:3-oxo-cerotoyl-CoA synthas…
B. dothidea	53_S186_L007_g10559.t1								Ank_2		8.A.28	The_Ankyrin_(Ankyrin)_Family	_Accessory_Factors_Involved_in_Transport	8.A.28.1.1	putative ankyrin repeat domain-containing protein 31	C:nucleus; P:regulation of biological process
B. dothidea	53_S186_L007_g1056.t1								ECH_1						enoyl-CoA hydratase/isomerase family protein	C:mitochondrion; F:delta3,5-delta2,4-dienoyl-CoA isomerase activity
B. dothidea	53_S186_L007_g10560.t1									SP(Sec/SPI)					putative gpi-anchored cell wall organization protein ecm33 protein	C:integral component of membrane
B. dothidea	53_S186_L007_g10561.t1									SP(Sec/SPI)					predicted protein
B. dothidea	53_S186_L007_g10562.t1								Thioredoxin;WD40;ERp29		8.A.88	The_calciquestrin_(CASQ)_Family	_Accessory_Factors_Involved_in_Transport	8.A.88.1.3	WD40 repeat-like protein	F:Rab GTPase binding
B. dothidea	53_S186_L007_g10563.t1								Ribonuc_red_sm						ribonucleoside-diphosphate reductase subunit M2	C:nucleus; C:ribonucleoside-diphosphate reductase complex; P:dCDP biosynthetic process; F:ferrous iron binding; F:zinc ion binding; C:integral component of membrane; P:CDP metabolic process; F:protein heterodimerization activity; F:CDP reductase activity; P:oxidation-reduction process
B. dothidea	53_S186_L007_g10564.t1								ADH_zinc_N;ADH_N						NAD(P)-binding protein	F:zinc ion binding; F:oxidoreductase activity; P:oxidation-reduction process
B. dothidea	53_S186_L007_g10565.t1														zonadhesin-like isoform X2	C:membrane; C:integral component of membrane
B. dothidea	53_S186_L007_g10567.t1														hypothetical protein UCRNP2_8680
B. dothidea	53_S186_L007_g10568.t1														hypothetical protein UCRNP2_8680
B. dothidea	53_S186_L007_g10569.t1														C2H2 transcription factor, putative	F:nucleic acid binding
B. dothidea	53_S186_L007_g1057.t1								Med1						putative mediator complex subunit med1 metazoa fungi protein	F:transcription coregulator activity; P:regulation of transcription by RNA polymerase II; C:mediator complex
B. dothidea	53_S186_L007_g10570.t1														predicted protein	P:cellular response to oxidative stress
B. dothidea	53_S186_L007_g10571.t1								TIP120						TIP120-domain-containing protein	C:nucleus; P:SCF complex assembly; P:protein ubiquitination
B. dothidea	53_S186_L007_g10572.t1								PLAC8						PLAC8-domain-containing protein	F:molecular_function; C:cellular_component; P:biological_process; C:membrane; C:integral component of membrane
B. dothidea	53_S186_L007_g10573.t1								Isochorismatase	SP(Sec/SPI)					Isochorismatase hydrolase	F:hydrolase activity
B. dothidea	53_S186_L007_g10574.t1														PTH11-type GPCR protein	C:integral component of membrane
B. dothidea	53_S186_L007_g10575.t1								Abhydrolase_6	SP(Sec/SPI)					hypothetical protein UCRNP2_8533	F:molecular_function; P:biological_process; F:hydrolase activity
B. dothidea	53_S186_L007_g10576.t1								FAD_binding_2						putative fumarate reductase flavoprotein subunit protein	F:oxidoreductase activity; P:oxidation-reduction process
B. dothidea	53_S186_L007_g10577.t1								DIT1_PvcA						pyoverdine dityrosine biosynthesis	F:amidase activity; F:transferase activity
B. dothidea	53_S186_L007_g10578.t1								Peptidase_S10	SP(Sec/SPI)					carboxypeptidase s1	C:fungal-type vacuole; F:serine-type carboxypeptidase activity; C:extracellular region; P:regulation of transcription, DNA-templated; P:phytochelatin biosynthetic process; P:proteolysis involved in cellular protein catabolic process
B. dothidea	53_S186_L007_g10579.t1								AA_permease		2.A.3	The_Amino_Acid-Polyamine-Organocation_(APC)_Family	_Electrochemical_Potential-driven_Transporters	2.A.3.10.22	amino acid permease	P:amino acid transport; C:integral component of membrane; F:transmembrane transporter activity; P:transmembrane transport
B. dothidea	53_S186_L007_g1058.t1										2.A.1	The_Major_Facilitator_Superfamily_(MFS)	_Electrochemical_Potential-driven_Transporters	2.A.1.7.25	predicted protein	F:molecular_function; C:cellular_component; P:biological_process; C:membrane; C:integral component of membrane
B. dothidea	53_S186_L007_g10580.t1		NRPS												l-threonine 3-dehydrogenase	F:zinc ion binding; F:oxidoreductase activity; P:oxidation-reduction process
B. dothidea	53_S186_L007_g10581.t1		NRPS						FAD_binding_3						FAD binding domain protein	F:monooxygenase activity; C:membrane; C:integral component of membrane; F:lyase activity; P:oxidation-reduction process; F:FAD binding
B. dothidea	53_S186_L007_g10582.t1		NRPS								1.C.104	The_Heterokaryon_Incompatibility_Prion/Amyloid_Protein_(HET-s)_Family	_Channels/Pores	1.C.104.2.1	protein kinase, catalytic domain-containing protein	F:protein kinase activity; F:ATP binding; P:protein phosphorylation; F:kinase activity; P:phosphorylation; F:hydrolase activity
B. dothidea	53_S186_L007_g10584.t1		NRPS							SP(Sec/SPI)					hypothetical protein T310_7212
B. dothidea	53_S186_L007_g10585.t1		NRPS						ABC_tran;ABC_membrane		3.A.1	The_ATP-binding_Cassette_(ABC)_Superfamily	_Primary_Active_Transporters	3.A.1.201.7	ABC multidrug transporter Mdr1	F:ATP binding; C:integral component of membrane; F:ATPase activity; P:cellular response to drug; F:ATPase-coupled transmembrane transporter activity; C:cell part; P:transmembrane transport
B. dothidea	53_S186_L007_g10586.t1		NRPS						AMP-binding;PP-binding;Condensation		4.C.1	The_Fatty_Acid_Transporter_(FAT)_Family	_Group_Translocators	4.C.1.1.4	nonribosomal peptide synthase	F:ligase activity; F:phosphopantetheine binding
B. dothidea	53_S186_L007_g10587.t1		NRPS						NPP1	SP(Sec/SPI)					NPP1 domain protein	F:molecular_function; C:cellular_component; P:biological_process
B. dothidea	53_S186_L007_g10588.t1		NRPS												conserved Plasmodium protein	F:GTPase activity; C:mitochondrial outer membrane; P:mitochondrial fusion; C:integral component of membrane
B. dothidea	53_S186_L007_g10589.t1		NRPS						Ysc84						DUF500-domain-containing protein	C:ruffle membrane; F:phosphatidylinositol binding; P:regulation of ruffle assembly
B. dothidea	53_S186_L007_g1059.t1								FAD_binding_3						putative fad binding domain protein	C:membrane; F:FAD binding
B. dothidea	53_S186_L007_g10590.t1		NRPS						COesterase	SP(Sec/SPI)	8.A.117	The_Neuroligin_(Nlg)_Family	_Accessory_Factors_Involved_in_Transport	8.A.117.1.3	carboxylesterase, putative	F:hydrolase activity
B. dothidea	53_S186_L007_g10592.t1									SP(Sec/SPI)					hypothetical protein UCRNP2_10003	F:molecular_function; C:cellular_component; P:biological_process
B. dothidea	53_S186_L007_g10593.t1								F420_oxidored;P5CR_dimer						pyrroline-5-carboxylate reductase	F:pyrroline-5-carboxylate reductase activity; C:membrane; P:oxidation-reduction process; P:L-proline biosynthetic process
B. dothidea	53_S186_L007_g10594.t1									SP(Sec/SPI)
B. dothidea	53_S186_L007_g10595.t1								CTK3;CTK3_C						CTD kinase subunit gamma	P:rRNA processing; C:integral component of membrane; F:kinase activity; F:snoRNA binding; P:positive regulation of DNA-templated transcription, elongation; P:positive regulation of transcription by RNA polymerase I; C:CTDK-1 complex; P:phosphorylation of RNA polymerase II C-terminal domain serine 2 residues; P:positive regulation of induction of conjugation with cellular fusion by regulation of t…
B. dothidea	53_S186_L007_g10596.t1								Ribosomal_L12;Ribosomal_L12_N						putative mitochondrial 54S ribosomal protein MNP1	F:structural constituent of ribosome; C:ribosome; P:translation
B. dothidea	53_S186_L007_g10597.t1								AAA_5		3.D.4	The_Proton-translocating_Cytochrome_Oxidase_(COX)_Superfamily	_Primary_Active_Transporters	3.D.4.10.1	midasin	P:cellular process; P:ribosome biogenesis
B. dothidea	53_S186_L007_g10598.t1								Glyco_hydro_88						predicted protein	F:catalytic activity
B. dothidea	53_S186_L007_g10599.t1														predicted protein	C:membrane
B. dothidea	53_S186_L007_g106.t1														hypothetical protein UCRNP2_6041
B. dothidea	53_S186_L007_g1060.t1								NACHT;Helo_like_N						ankyrin repeat protein	C:eisosome; P:eisosome assembly
B. dothidea	53_S186_L007_g10600.t1								Cation_efflux;ZT_dimer		2.A.4	The_Cation_Diffusion_Facilitator_(CDF)_Family	_Electrochemical_Potential-driven_Transporters	2.A.4.5.2	cation diffusion facilitator 1	F:cation transmembrane transporter activity; C:integral component of membrane; P:cation transmembrane transport
B. dothidea	53_S186_L007_g10601.t1								MFS_1		2.A.1	The_Major_Facilitator_Superfamily_(MFS)	_Electrochemical_Potential-driven_Transporters	2.A.1.2.63	MFS general substrate transporter	C:integral component of membrane; P:transmembrane transport
B. dothidea	53_S186_L007_g10602.t1								PAN_4	SP(Sec/SPI)					hypothetical protein UCRNP2_6852
B. dothidea	53_S186_L007_g10603.t1								AA_permease_2		2.A.3	The_Amino_Acid-Polyamine-Organocation_(APC)_Family	_Electrochemical_Potential-driven_Transporters	2.A.3.4.2	amino acid transporter	C:integral component of membrane; F:transmembrane transporter activity; P:transmembrane transport
B. dothidea	53_S186_L007_g10604.t1								TIP49						RuvB-like helicase 1	P:box C/D snoRNP assembly; C:Swr1 complex; F:DNA helicase activity; F:ATP binding; P:DNA repair; P:chromatin remodeling; P:regulation of transcription by RNA polymerase II; P:histone acetylation; C:Ino80 complex; P:DNA duplex unwinding; C:NuA4 histone acetyltransferase complex; C:R2TP complex
B. dothidea	53_S186_L007_g10605.t1								Bromodomain;BET						Bromodomain-containing protein
B. dothidea	53_S186_L007_g10606.t1								Utp12						NUC189-domain-containing protein
B. dothidea	53_S186_L007_g10608.t1									SP(Sec/SPI)					putative beta gamma crystallin protein
B. dothidea	53_S186_L007_g10609.t1														hypothetical protein UCRNP2_7349
B. dothidea	53_S186_L007_g1061.t1								PhyH						phytanoyl-CoA dioxygenase family protein	P:terpenoid biosynthetic process; F:metal ion binding; F:dioxygenase activity; P:oxidation-reduction process; P:fumagillin biosynthetic process
B. dothidea	53_S186_L007_g10611.t1								SnoaL_2						hypothetical protein Z518_09441
B. dothidea	53_S186_L007_g10612.t1								K_oxygenase;NAD_binding_8						FAD/NAD(P)-binding domain-containing protein	F:nucleotide binding; F:monooxygenase activity; F:coenzyme binding; P:oxidation-reduction process
B. dothidea	53_S186_L007_g10613.t1								LisH						putative wd repeat protein	C:histone deacetylase complex; F:transcription corepressor activity; F:N,N-dimethylaniline monooxygenase activity; P:regulation of transcription by RNA polymerase II; P:histone deacetylation; C:Set3 complex; F:flavin adenine dinucleotide binding; F:NADP binding; P:oxidation-reduction process; P:negative regulation of nucleic acid-templated transcription
B. dothidea	53_S186_L007_g10614.t1								DUF1751						cytochrome C oxidase subunit I	P:retrograde vesicle-mediated transport, Golgi to endoplasmic reticulum; C:integral component of membrane
B. dothidea	53_S186_L007_g10615.t1								HMGL-like		3.B.1	The_Na<sup>+</sup>-transporting_Carboxylic_Acid_Decarboxylase_(NaT-DC)_Family	_Primary_Active_Transporters	3.B.1.1.6	hydroxymethylglutaryl-CoA lyase	F:hydroxymethylglutaryl-CoA lyase activity; C:cytosol; P:leucine catabolic process; P:lipid metabolic process; P:ketone body biosynthetic process
B. dothidea	53_S186_L007_g10616.t1								Diphthamide_syn						diphthamide biosynthesis protein 1	F:transferase activity; P:peptidyl-diphthamide biosynthetic process from peptidyl-histidine
B. dothidea	53_S186_L007_g10617.t1								PMI_typeI						mannose-6-phosphate isomerase	F:mannose-6-phosphate isomerase activity; P:carbohydrate metabolic process; F:zinc ion binding; P:GDP-mannose biosynthetic process
B. dothidea	53_S186_L007_g10618.t1					GT34			Glyco_transf_34						glycosyltransferase family 34 protein	C:Golgi membrane; C:integral component of membrane; F:transferase activity, transferring glycosyl groups; P:glycosylation
B. dothidea	53_S186_L007_g10619.t1								adh_short						putative short-chain dehydrogenase reductase superfamily protein
B. dothidea	53_S186_L007_g10620.t1								adh_short						NAD(P)-binding protein	C:integral component of membrane; F:oxidoreductase activity; P:oxidation-reduction process
B. dothidea	53_S186_L007_g10621.t1								DNA_binding_1						DNA binding methylated-DNA--cysteine S-methyltransferase	F:transferase activity
B. dothidea	53_S186_L007_g10622.t1								Lyase_aromatic						phenylalanine ammonia-lyase	C:cytoplasm; P:L-phenylalanine catabolic process; P:cinnamic acid biosynthetic process; F:phenylalanine ammonia-lyase activity
B. dothidea	53_S186_L007_g10623.t1								SART-1						DNA binding protein SART-1	P:mRNA splicing, via spliceosome
B. dothidea	53_S186_L007_g10624.t1								Ribosomal_L28						putative 54s ribosomal protein l24 protein	F:structural constituent of ribosome; C:mitochondrial large ribosomal subunit; P:translation
B. dothidea	53_S186_L007_g10625.t1								PTH2						PTH2-domain-containing protein	F:aminoacyl-tRNA hydrolase activity; C:cytosol; C:integral component of membrane
B. dothidea	53_S186_L007_g10626.t1								DUF4448	SP(Sec/SPI)					predicted protein	F:molecular_function; C:cellular_component; P:biological_process; C:membrane; C:integral component of membrane
B. dothidea	53_S186_L007_g10627.t1									SP(Sec/SPI)					hypothetical protein UCRNP2_725	C:membrane
B. dothidea	53_S186_L007_g10628.t1								L51_S25_CI-B8						putative 50s ribosomal protein mrp49 protein	F:structural constituent of ribosome; C:mitochondrion; C:ribosome
B. dothidea	53_S186_L007_g10629.t1								GET2						hypothetical protein CC77DRAFT_1099136	C:membrane; C:integral component of membrane; F:protein membrane anchor; P:protein insertion into ER membrane
B. dothidea	53_S186_L007_g1063.t1														short-chain dehydrogenase
B. dothidea	53_S186_L007_g10631.t1								BING4CT						BING4CT-domain-containing protein	F:molecular_function
B. dothidea	53_S186_L007_g10632.t1								AAA		3.A.25	The_Symbiont-specific_ERAD-like_Machinery_(SELMA)_Family	_Primary_Active_Transporters	3.A.25.2.1	AAA-domain-containing protein	F:ATP binding
B. dothidea	53_S186_L007_g10633.t1					GH5_5	GH5_5		Cellulase	SP(Sec/SPI)					glycoside hydrolase family 5 protein	F:cellulase activity; P:glucan catabolic process
B. dothidea	53_S186_L007_g10634.t1								HAD;AAA_17;UPRTase						uracil phosphoribosyltransferase	P:nucleoside metabolic process; C:membrane; F:transferase activity, transferring glycosyl groups
B. dothidea	53_S186_L007_g10635.t1								AA_permease		2.A.3	The_Amino_Acid-Polyamine-Organocation_(APC)_Family	_Electrochemical_Potential-driven_Transporters	2.A.3.10.12	amino acid transporter	P:transport
B. dothidea	53_S186_L007_g10637.t1								Pkinase						predicted protein	F:molecular_function; C:cellular_component; P:biological_process; C:membrane; C:integral component of membrane
B. dothidea	53_S186_L007_g10638.t1								zf-C2H2_jaz						putative zinc finger protein	F:nucleic acid binding; F:metal ion binding
B. dothidea	53_S186_L007_g10639.t1								Disintegrin;Reprolysin_5	SP(Sec/SPI)	8.A.77	The_Sheddase_(Sheddase)_Family	_Accessory_Factors_Involved_in_Transport	8.A.77.1.3	ADAM 8 precursor	F:metalloendopeptidase activity; P:proteolysis; C:integral component of membrane
B. dothidea	53_S186_L007_g1064.t1								DUF1989						glucose 1-dehydrogenase	F:catalytic activity; P:carbohydrate metabolic process; F:hydrolase activity, acting on carbon-nitrogen (but not peptide) bonds
B. dothidea	53_S186_L007_g10641.t1								WD40		3.A.20	The_Peroxisomal_Protein_Importer_(PPI)_Family	_Primary_Active_Transporters	3.A.20.1.2	WD40 repeat-like protein
B. dothidea	53_S186_L007_g10642.t1					AA3_2			GMC_oxred_N;GMC_oxred_C						alcohol oxidase	F:oxidoreductase activity, acting on CH-OH group of donors; F:flavin adenine dinucleotide binding; P:oxidation-reduction process
B. dothidea	53_S186_L007_g10643.t1								ABC_tran;ABC2_membrane;PDR_CDR;ABC_trans_N		3.A.1	The_ATP-binding_Cassette_(ABC)_Superfamily	_Primary_Active_Transporters	3.A.1.205.2	ABC multidrug transporter, putative	F:nucleotide binding; C:plasma membrane; F:hydrolase activity; P:cellular response to drug; F:ATPase-coupled transmembrane transporter activity; P:transmembrane transport
B. dothidea	53_S186_L007_g10644.t1								HET	SP(Sec/SPI)					hypothetical protein UCRNP2_7813
B. dothidea	53_S186_L007_g10645.t1								Kelch_5	SP(Sec/SPI)					Kelch repeat protein	C:integral component of membrane
B. dothidea	53_S186_L007_g10646.t1								HET						hypothetical protein VDAG_09514
B. dothidea	53_S186_L007_g10647.t1								CwfJ_C_2;CwfJ_C_1						cell cycle control protein (Cwf19), putative	F:molecular_function; P:biological_process
B. dothidea	53_S186_L007_g10648.t1								ATP_bind_1						ATP binding protein, putative	F:GTPase activity; F:GTP binding; C:nucleus; C:cytoplasm; P:protein import into nucleus; P:mitotic sister chromatid cohesion; F:ATPase activity
B. dothidea	53_S186_L007_g10649.t1								JAB						eukaryotic translation initiation factor 3 subunit H	P:formation of cytoplasmic translation initiation complex; F:translation initiation factor activity; C:eukaryotic translation initiation factor 3 complex; C:eukaryotic 43S preinitiation complex; C:eukaryotic 48S preinitiation complex
B. dothidea	53_S186_L007_g1065.t1														hypothetical protein SAPIO_CDS1649
B. dothidea	53_S186_L007_g10651.t1								Glyco_hydro_71	SP(Sec/SPI)					putative glycoside hydrolase family 71 protein	F:hydrolase activity
B. dothidea	53_S186_L007_g10652.t1								GST_C_2;GST_N_3		1.A.12	The_Intracellular_Chloride_Channel_(CLIC)_Family	_Channels/Pores	1.A.12.2.1	glutathione transferase	C:membrane; F:transferase activity
B. dothidea	53_S186_L007_g10653.t1								zf-C2H2						putative c2h2 transcription factor protein	F:nucleic acid binding
B. dothidea	53_S186_L007_g10654.t1								Tannase						feruloyl esterase B precursor	F:molecular_function; C:cellular_component; P:biological_process; F:hydrolase activity
B. dothidea	53_S186_L007_g10655.t1										2.A.1	The_Major_Facilitator_Superfamily_(MFS)	_Electrochemical_Potential-driven_Transporters	2.A.1.7.25	MFS transporter, FHS family, L-fucose permease	C:membrane; C:integral component of membrane; P:transmembrane transport
B. dothidea	53_S186_L007_g10656.t1								MMR_HSR1;YchF-GTPase_C						GTP-binding protein YchF	F:ATP binding; F:GTP binding; C:cytoplasm; F:ATPase activity; F:ribosome binding; F:ribosomal large subunit binding
B. dothidea	53_S186_L007_g10657.t1								Peptidase_C97						UPF0326 protein hag1
B. dothidea	53_S186_L007_g10658.t1								Ribosomal_S11						mitochondrial ribosomal protein subunit S18	F:structural constituent of ribosome; C:ribosome; P:translation
B. dothidea	53_S186_L007_g10659.t1								Tim44		3.A.8	The_Mitochondrial_Protein_Translocase_(MPT)_Family	_Primary_Active_Transporters	3.A.8.1.1	mitochondrial inner membrane translocase subunit TIM44	C:mitochondrial inner membrane; P:protein import into mitochondrial matrix; F:chaperone binding
B. dothidea	53_S186_L007_g1066.t1								AAA						aaa family ATPase	F:ATP binding; F:hydrolase activity
B. dothidea	53_S186_L007_g10660.t1														hypothetical protein NFIA_005080
B. dothidea	53_S186_L007_g10661.t1								PAS_9						putative k+-channel erg-like protein
B. dothidea	53_S186_L007_g10662.t1														predicted protein
B. dothidea	53_S186_L007_g10663.t1														putative stomatin family protein	C:membrane
B. dothidea	53_S186_L007_g10664.t1								Band_7;Band_7_C		8.A.21	The_Stomatin/Podocin/Band_7/Nephrosis.2/SPFH_(Stomatin)_Family	_Accessory_Factors_Involved_in_Transport	8.A.21.2.2	putative stomatin family protein	C:membrane
B. dothidea	53_S186_L007_g10665.t1								Abhydrolase_3						putative alpha beta hydrolase fold-3 protein	F:hydrolase activity
B. dothidea	53_S186_L007_g10666.t1					GT2_Glyco_tranf_2_3			Beta-lactamase;Glyco_tranf_2_3		4.D.3	The_Glycan_Glucosyl_Transferase_(OpgH)_Family	_Group_Translocators	4.D.3.1.13	glycosyl transferase	C:membrane
B. dothidea	53_S186_L007_g10667.t1								Zn_clus;Fungal_trans						binuclear zinc transcription factor	P:regulation of transcription, DNA-templated; F:metal ion binding
B. dothidea	53_S186_L007_g10668.t1								Arf		3.A.30	The_Endoplasmic_Reticulum_Surface_Retrieval_Pathway_(ER-SURF)	_Primary_Active_Transporters	3.A.30.1.1	ADP-ribosylation factor	F:GTP binding; C:Golgi apparatus; C:plasma membrane; P:intracellular protein transport; P:Golgi to plasma membrane transport
B. dothidea	53_S186_L007_g10669.t1								zf-U1						U1 zinc finger domain-containing protein	P:metabolic process; F:metal ion binding; F:organic cyclic compound binding; F:heterocyclic compound binding
B. dothidea	53_S186_L007_g10670.t1								Tim54		3.A.8	The_Mitochondrial_Protein_Translocase_(MPT)_Family	_Primary_Active_Transporters	3.A.8.1.1	mitochondrial import inner membrane translocase subunit tim54	C:membrane
B. dothidea	53_S186_L007_g10671.t1								WD40;Hira;HIRA_B		8.A.92	The_G-Protein_Î±Î_Î__Complex_(GPC)_Family	_Accessory_Factors_Involved_in_Transport	8.A.92.1.1	protein HIR1	P:mitotic sister chromatid segregation; C:HIR complex; C:nuclear chromatin; F:DNA binding; F:transcription corepressor activity; P:DNA replication-independent nucleosome assembly; P:chromatin silencing at centromere; F:nucleosome binding; P:regulation of chromatin silencing
B. dothidea	53_S186_L007_g10672.t1														hypothetical protein W97_00666	C:membrane; C:integral component of membrane
B. dothidea	53_S186_L007_g10673.t1								Rhomboid		9.B.104	The_Rhomboid_Protease_(Rhomboid)_Family	_Incompletely_Characterized_Transport_Systems	9.B.104.1.6	Rhomboid family protein	F:serine-type endopeptidase activity; P:proteolysis; C:integral component of membrane
B. dothidea	53_S186_L007_g10674.t1														hypothetical protein UCRNP2_7194	P:proteasome regulatory particle assembly
B. dothidea	53_S186_L007_g10675.t1														hypothetical protein UCRNP2_7195
B. dothidea	53_S186_L007_g10676.t1								DUF866						DUF866-domain-containing protein
B. dothidea	53_S186_L007_g10678.t1								Mob1_phocein						kinase activator protein	F:kinase activity; P:phosphorylation
B. dothidea	53_S186_L007_g10679.t1								Leo1						putative leo1-like protein	P:transcription elongation from RNA polymerase II promoter; P:histone modification; C:Cdc73/Paf1 complex
B. dothidea	53_S186_L007_g10680.t1								Aa_trans		2.A.18	The_Amino_Acid/Auxin_Permease_(AAAP)_Family	_Electrochemical_Potential-driven_Transporters	2.A.18.4.2	neutral amino acid permease, putative	P:amino acid transmembrane transport; F:aminomethyltransferase activity; P:glycine catabolic process; F:amino acid transmembrane transporter activity; C:integral component of membrane; P:methylation
B. dothidea	53_S186_L007_g10681.t1								PEMT						methylene-fatty-acyl-phospholipid synthase	F:phosphatidyl-N-methylethanolamine N-methyltransferase activity; C:endoplasmic reticulum membrane; P:phosphatidylcholine biosynthetic process; C:integral component of membrane; C:mitochondrial membrane; P:methylation; F:phosphatidyl-N-dimethylethanolamine N-methyltransferase activity
B. dothidea	53_S186_L007_g10682.t1								Tubulin;Tubulin_C						tubulin beta chain	F:GTPase activity; F:structural constituent of cytoskeleton; F:GTP binding; C:spindle microtubule; C:cytoplasmic microtubule; P:cytoplasmic microtubule organization; C:tubulin complex; P:intracellular distribution of mitochondria; P:establishment or maintenance of cell polarity regulating cell shape; P:mitotic spindle assembly; P:positive regulation of intracellular protein transport; P:nuclear m…
B. dothidea	53_S186_L007_g10683.t1								Peptidase_M49						dipeptidyl-peptidase III	C:cytoplasm; P:proteolysis; F:metallopeptidase activity; F:dipeptidyl-peptidase activity; F:metal ion binding
B. dothidea	53_S186_L007_g10684.t1								SLD3						putative dna replication regulator sld3 protein	C:nuclear chromatin; F:molecular_function; C:cellular_component; P:DNA replication initiation; P:biological_process; C:DNA replication preinitiation complex
B. dothidea	53_S186_L007_g10685.t1														putative cell wall anchored protein	F:molecular_function; C:cellular_component; P:biological_process; C:membrane; C:integral component of membrane
B. dothidea	53_S186_L007_g10686.t1									SP(Sec/SPI)					hypothetical protein COCC4DRAFT_45429
B. dothidea	53_S186_L007_g10687.t1								adh_short						WW domain-containing oxidoreductase isoform 1	C:membrane
B. dothidea	53_S186_L007_g10688.t1														predicted protein
B. dothidea	53_S186_L007_g10689.t1														putative duf300 domain protein	F:GTPase activity; C:mitochondrial outer membrane; P:mitochondrial fusion; C:membrane; C:integral component of membrane
B. dothidea	53_S186_L007_g1069.t1					AA3_2	AA3_2		GMC_oxred_N;GMC_oxred_C	SP(Sec/SPI)					choline dehydrogenase	F:oxidoreductase activity, acting on CH-OH group of donors; F:flavin adenine dinucleotide binding; P:oxidation-reduction process
B. dothidea	53_S186_L007_g10690.t1								Sulfatase						arylsulfatase precursor	F:sulfuric ester hydrolase activity
B. dothidea	53_S186_L007_g10691.t1					GH105	GH105		Glyco_hydro_88	SP(Sec/SPI)					cell wall glycosyl hydrolase YteR	F:hydrolase activity
B. dothidea	53_S186_L007_g10692.t1									SP(Sec/SPI)					hypothetical protein UCRNP2_562
B. dothidea	53_S186_L007_g10693.t1								F-box-like						putative chromatin modification-related protein eaf7 protein
B. dothidea	53_S186_L007_g10694.t1								DUF218						putative duf218 domain protein	F:molecular_function; C:cellular_component; P:biological_process
B. dothidea	53_S186_L007_g10695.t1														putative methionine synthase vitamin-b12 independent protein	P:metabolic process
B. dothidea	53_S186_L007_g10697.t1								MFS_1		2.A.1	The_Major_Facilitator_Superfamily_(MFS)	_Electrochemical_Potential-driven_Transporters	2.A.1.2.86	putative major facilitator superfamily protein	C:fungal-type vacuole membrane; F:transporter activity; C:integral component of plasma membrane; P:drug transmembrane transport
B. dothidea	53_S186_L007_g10699.t1								TauD;DIT1_PvcA						pyoverdine/dityrosine biosynthesis protein	F:oxidoreductase activity; P:oxidation-reduction process
B. dothidea	53_S186_L007_g107.t1														putative c2h2 transcription factor protein	F:nucleic acid binding
B. dothidea	53_S186_L007_g10700.t1								FAD_binding_3						monooxygenase, putative	F:FAD binding
B. dothidea	53_S186_L007_g10701.t1								2OG-FeII_Oxy;DIOX_N						putative flavonol synthase protein	F:oxidoreductase activity; F:metal ion binding; P:oxidation-reduction process
B. dothidea	53_S186_L007_g10703.t1								Sugar_tr		2.A.1	The_Major_Facilitator_Superfamily_(MFS)	_Electrochemical_Potential-driven_Transporters	2.A.1.19.38	membrane transporter	C:integral component of membrane; F:transmembrane transporter activity; P:transmembrane transport
B. dothidea	53_S186_L007_g10704.t1								ESSS						putative nadh-ubiquinone oxidoreductase protein	C:integral component of membrane
B. dothidea	53_S186_L007_g10705.t1									SP(Sec/SPI)					hypothetical protein UCRNP2_568	C:integral component of membrane
B. dothidea	53_S186_L007_g10706.t1								Abhydrolase_6						predicted protein	F:hydrolase activity
B. dothidea	53_S186_L007_g10707.t1								Ribosomal_L6e						60S ribosomal protein L6	F:structural constituent of ribosome; C:ribosome; P:translation
B. dothidea	53_S186_L007_g10708.t1								Proteasom_Rpn13;RPN13_C						putative 26s proteasome complex ubiquitin receptor subunit rpn13 protein	C:proteasome complex; C:nucleus; C:cytoplasm
B. dothidea	53_S186_L007_g10709.t1								CDC27						putative dna polymerase subunit cdc27 protein	C:nucleus; P:DNA replication
B. dothidea	53_S186_L007_g1071.t1								DUF3450						microtubule-associated protein 1A-like
B. dothidea	53_S186_L007_g10710.t1								RRM_1;TFCD_C						beta-tubulin cofactor d	F:binding; P:protein folding; P:cellular component organization
B. dothidea	53_S186_L007_g10711.t1								ATP-synt_D		3.A.2	The_H<sup>+</sup>-_or_Na<sup>+</sup>-translocating_F-type,_V-type_and_A-type_ATPase_(F-ATPase)_Superfamily	_Primary_Active_Transporters	3.A.2.2.3	V-type proton ATPase subunit D	P:vacuolar acidification; C:vacuolar proton-transporting V-type ATPase complex; F:ATPase-coupled transmembrane transporter activity; F:proton-transporting ATPase activity, rotational mechanism; P:proton transmembrane transport
B. dothidea	53_S186_L007_g10712.t1								TPR_15						pre-mRNA-splicing factor syf1	P:generation of catalytic spliceosome for first transesterification step; C:Prp19 complex; C:U2-type catalytic step 2 spliceosome; C:post-mRNA release spliceosomal complex
B. dothidea	53_S186_L007_g10713.t1														predicted protein	C:integral component of membrane; P:transmembrane transport
B. dothidea	53_S186_L007_g10714.t1								Helicase_C;Arrestin_N;S1;HA2;OB_NTP_bind;AAA_22		1.A.53	The_Hepatitis_C_Virus_P7_Viroporin_Cation-selective_Channel_(HCV-P7)_Family	_Channels/Pores	1.A.53.1.4	pre-mRNA-splicing factor ATP-dependent RNA helicase prp22	P:spliceosomal complex disassembly; F:RNA binding; F:helicase activity; F:ATP binding; C:U2-type spliceosomal complex; C:catalytic step 2 spliceosome; C:post-mRNA release spliceosomal complex
B. dothidea	53_S186_L007_g10715.t1								Na_Ca_ex		2.A.19	The_Ca<sup>2+</sup>:Cation_Antiporter_(CaCA)_Family	_Electrochemical_Potential-driven_Transporters	2.A.19.2.8	calcium/proton exchanger	C:vacuolar membrane; P:calcium ion transport; F:antiporter activity; C:integral component of membrane; P:transmembrane transport
B. dothidea	53_S186_L007_g10716.t1								SNF2_N;Helicase_C;zf-RING_5						DNA repair protein rad5	F:ATP binding; C:integral component of membrane
B. dothidea	53_S186_L007_g10717.t1								Fungal_trans						pathway-specific nitrogen regulator	P:regulation of transcription, DNA-templated; F:metal ion binding
B. dothidea	53_S186_L007_g10718.t1								Glutaredoxin						putative glutaredoxin domain protein	C:cell; F:electron transfer activity; F:protein disulfide oxidoreductase activity; P:electron transport chain; P:cell redox homeostasis
B. dothidea	53_S186_L007_g10719.t1														hypothetical protein UCRNP2_10040	P:cellular glucose homeostasis; F:hexokinase activity; F:ATP binding; F:glucose binding; C:cell; P:glycolytic process; C:integral component of membrane; P:carbohydrate phosphorylation
B. dothidea	53_S186_L007_g1072.t1								MFS_MOT1		2.A.53	The_Sulfate_Permease_(SulP)_Family	_Electrochemical_Potential-driven_Transporters	2.A.53.5.1	sulfate transporter	F:molybdate ion transmembrane transporter activity; P:molybdate ion transport; C:integral component of membrane
B. dothidea	53_S186_L007_g10720.t1										1.I.1	The_Eukaryotic_Nuclear_Pore_Complex_(E-NPC)_Family	_Channels/Pores	1.I.1.1.2	nuclear pore complex subunit	F:molecular_function
B. dothidea	53_S186_L007_g10721.t1								ATP_bind_1						ATP binding protein, putative	F:GTPase activity; F:GTP binding; F:FMN binding
B. dothidea	53_S186_L007_g10722.t1								Pyridox_oxase_2						putative atp binding protein	F:FMN binding
B. dothidea	53_S186_L007_g10723.t1														hypothetical protein UCRNP2_10043
B. dothidea	53_S186_L007_g10726.t1					GH92	GH92		Glyco_hydro_92	SP(Sec/SPI)	1.C.96	The_Haemolytic_Lectin,_CEL-III_(CEL-III)_Family	_Channels/Pores	1.C.96.1.3	alpha-1,2-mannosidase, putative	F:peptide-N4-(N-acetyl-beta-glucosaminyl)asparagine amidase activity; C:nucleus; C:cytosol; P:protein quality control for misfolded or incompletely synthesized proteins; P:glycoprotein catabolic process; P:protein deglycosylation; C:integral component of membrane; F:carbohydrate binding
B. dothidea	53_S186_L007_g10727.t1								ADH_zinc_N;ADH_N						alcohol dehydrogenase	F:oxidoreductase activity; P:oxidation-reduction process
B. dothidea	53_S186_L007_g10728.t1								Hexokinase_1;Hexokinase_2						hexokinase family protein	P:cellular glucose homeostasis; F:glucokinase activity; C:cytosol; P:glycolytic process; F:fructokinase activity; F:mannokinase activity; F:small molecule binding
B. dothidea	53_S186_L007_g10729.t1								GILT						putative gamma interferon inducible lysosomal thiol reductase gilt protein	C:integral component of membrane
B. dothidea	53_S186_L007_g10730.t1								DUF1681						adaptin ear-binding coat-associated protein 1 NECAP-1	C:membrane
B. dothidea	53_S186_L007_g10731.t1								HAD						putative phosphoserine phosphatase protein	P:dephosphorylation; F:phosphatase activity
B. dothidea	53_S186_L007_g10732.t1								She9_MDM33						putative mitochondrion biogenesis protein	C:mitochondrial inner membrane; C:integral component of membrane
B. dothidea	53_S186_L007_g10733.t1								Ammonium_transp		1.A.11	The_Ammonium_Transporter_Channel_(Amt)_Family	_Channels/Pores	1.A.11.3.3	ammonium transporter	C:integral component of plasma membrane; F:ammonium transmembrane transporter activity; P:nitrogen utilization; P:ammonium transmembrane transport
B. dothidea	53_S186_L007_g10734.t1								AAA;LON_substr_bdg;Lon_C						ATP-dependent protease La	F:ATP-dependent peptidase activity; F:serine-type endopeptidase activity; F:ATP binding; C:peroxisomal matrix; P:protein quality control for misfolded or incompletely synthesized proteins; P:protein processing; P:protein import into peroxisome matrix
B. dothidea	53_S186_L007_g10735.t1								Spindle_Spc25						kinetochore protein spc25	C:kinetochore; P:cellular process
B. dothidea	53_S186_L007_g10736.t1								Helicase_C;HA2;OB_NTP_bind;AAA_30		1.A.53	The_Hepatitis_C_Virus_P7_Viroporin_Cation-selective_Channel_(HCV-P7)_Family	_Channels/Pores	1.A.53.1.4	ATP dependent RNA helicase, putative	F:nucleic acid binding; F:helicase activity; F:ATP binding
B. dothidea	53_S186_L007_g10737.t1								CUE						putative cue domain-containing protein	F:protein binding
B. dothidea	53_S186_L007_g10738.t1								Arginase	SP(Sec/SPI)					agmatinase 1	F:agmatinase activity; F:metal ion binding
B. dothidea	53_S186_L007_g10739.t1								Cyt-b5						progesterone binding protein	P:regulation of ergosterol biosynthetic process
B. dothidea	53_S186_L007_g10741.t1					AA3_2	AA3_2		GMC_oxred_N;GMC_oxred_C	SP(Sec/SPI)					Gmc oxidoreductase	F:oxidoreductase activity, acting on CH-OH group of donors; F:flavin adenine dinucleotide binding; P:oxidation-reduction process
B. dothidea	53_S186_L007_g10743.t1														Nucleic acid-binding protein	P:resolution of meiotic recombination intermediates; F:single-stranded DNA binding; F:single-stranded DNA 3'-5' exodeoxyribonuclease activity; P:nucleic acid phosphodiester bond hydrolysis
B. dothidea	53_S186_L007_g10744.t1								Inos-1-P_synth;NAD_binding_5						myo-inositol-1-phosphate synthase	F:inositol-3-phosphate synthase activity; P:inositol biosynthetic process; P:phospholipid biosynthetic process
B. dothidea	53_S186_L007_g10745.t1					GH3			Glyco_hydro_3;Glyco_hydro_3_C;PA14;Fn3-like						glycoside hydrolase family 3 protein	F:hydrolase activity, hydrolyzing O-glycosyl compounds; P:carbohydrate metabolic process
B. dothidea	53_S186_L007_g10746.t1					GH92			Glyco_hydro_92		1.C.96	The_Haemolytic_Lectin,_CEL-III_(CEL-III)_Family	_Channels/Pores	1.C.96.1.3	glycoside hydrolase family 92 protein	F:peptide-N4-(N-acetyl-beta-glucosaminyl)asparagine amidase activity; C:nucleus; C:cytosol; P:protein quality control for misfolded or incompletely synthesized proteins; P:glycoprotein catabolic process; P:protein deglycosylation; F:carbohydrate binding
B. dothidea	53_S186_L007_g10747.t1								Methyltransf_23						S-adenosyl-L-methionine-dependent methyltransferase	P:cellular response to osmotic stress
B. dothidea	53_S186_L007_g10748.t1								SAM35;GST_C_6;GST_N_4						mitochondrial outer membrane protein (Sam35), putative
B. dothidea	53_S186_L007_g10749.t1									SP(Sec/SPI)
B. dothidea	53_S186_L007_g1075.t1								Oxysterol_BP;PH_8		2.D.1	The_PI4P/PS_Counter_Transporter_(P/P-CT)_Family	_Electrochemical_Potential-driven_Transporters	2.D.1.1.6	oxysterol binding protein	C:cytosol; C:plasma membrane; P:exocytosis; P:endocytosis; F:sterol transporter activity; P:maintenance of cell polarity; F:sterol binding; P:piecemeal microautophagy of the nucleus; P:ER to Golgi ceramide transport; C:perinuclear endoplasmic reticulum
B. dothidea	53_S186_L007_g10750.t1								A_deaminase						Metallo-dependent hydrolase	F:adenosine deaminase activity; P:adenosine catabolic process; P:inosine biosynthetic process
B. dothidea	53_S186_L007_g10751.t1														predicted protein	C:integral component of membrane
B. dothidea	53_S186_L007_g10752.t1								RNase_PH						putative exosome complex subunit rrp46 protein	C:nuclear exosome (RNase complex); C:cytoplasmic exosome (RNase complex); C:nucleolus; P:rRNA catabolic process; P:nuclear-transcribed mRNA catabolic process, exonucleolytic, 3'-5'; P:U4 snRNA 3'-end processing; P:nuclear mRNA surveillance; P:polyadenylation-dependent snoRNA 3'-end processing
B. dothidea	53_S186_L007_g10753.t1								NmrA						isoflavone reductase family protein	F:molecular_function; C:cellular_component; P:biological_process; F:oxidoreductase activity; F:transferase activity; P:oxidation-reduction process
B. dothidea	53_S186_L007_g10754.t1								Ras		9.A.3	The_Sorting_Nexin27_(SNX27)-Retromer_Assembly_Apparatus_for_Recycling_Integral_Membrane_Proteins_(SNX27-RetromerAA)_Family	_Incompletely_Characterized_Transport_Systems	9.A.3.1.1	ras-related protein-like protein	F:GTPase activity; F:GTP binding
B. dothidea	53_S186_L007_g10755.t1								EamA;DUF3955		2.A.7	The_Drug/Metabolite_Transporter_(DMT)_Superfamily	_Electrochemical_Potential-driven_Transporters	2.A.7.24.5	vacuolar membrane protein	C:integral component of membrane
B. dothidea	53_S186_L007_g10756.t1								TruB_N;TruB_C_2						pseudouridine synthase	P:pseudouridine synthesis; F:catalytic activity; P:RNA processing
B. dothidea	53_S186_L007_g10757.t1								DNMT1-RFD						predicted protein	F:DNA binding
B. dothidea	53_S186_L007_g10758.t1								Fungal_trans						protein kinase subdomain-containing protein	F:DNA-binding transcription factor activity, RNA polymerase II-specific; F:DNA binding; C:nucleus; P:transcription, DNA-templated; P:regulation of transcription, DNA-templated; P:regulation of transcription by RNA polymerase II; F:zinc ion binding; F:kinase activity; P:phosphorylation; P:secondary metabolic process; F:metal ion binding
B. dothidea	53_S186_L007_g10759.t1								GFA						DUF636 domain protein	F:carbon-sulfur lyase activity
B. dothidea	53_S186_L007_g1076.t1								Btz						hypothetical protein UCRNP2_1773	F:molecular_function; C:cellular_component; P:biological_process; F:zinc ion binding
B. dothidea	53_S186_L007_g10760.t1								Band_7;YdfA_immunity		8.A.21	The_Stomatin/Podocin/Band_7/Nephrosis.2/SPFH_(Stomatin)_Family	_Accessory_Factors_Involved_in_Transport	8.A.21.2.3	putative prohibitin protein	C:membrane
B. dothidea	53_S186_L007_g10761.t1								UcrQ						ubiquinol-cytochrome c reductase subunit 8	F:ubiquinol-cytochrome-c reductase activity; C:membrane; P:electron transport chain
B. dothidea	53_S186_L007_g10762.t1									SP(Sec/SPI)					hypothetical protein UCRNP2_10134
B. dothidea	53_S186_L007_g10763.t1														hypothetical protein UCRNP2_10133	C:membrane; C:integral component of membrane
B. dothidea	53_S186_L007_g10765.t1								ThrE;ThrE_2		2.A.79	The_Threonine/Serine_Exporter_(ThrE)_Family	_Electrochemical_Potential-driven_Transporters	2.A.79.1.10	DUF1212-domain-containing protein	C:integral component of membrane; F:hydrolase activity
B. dothidea	53_S186_L007_g10766.t1								G-alpha;zf-CHC2		8.A.92	The_G-Protein_Î±Î_Î__Complex_(GPC)_Family	_Accessory_Factors_Involved_in_Transport	8.A.92.1.3	guanine nucleotide-binding protein subunit alpha	F:G protein-coupled receptor binding; F:GTPase activity; F:GTP binding; C:heterotrimeric G-protein complex; P:adenylate cyclase-modulating G protein-coupled receptor signaling pathway; F:G-protein beta/gamma-subunit complex binding; F:metal ion binding
B. dothidea	53_S186_L007_g10767.t1								HAD						2,3-diketo-5-methylthio-1-phosphopentane phosphatase	P:dephosphorylation; F:phosphatase activity
B. dothidea	53_S186_L007_g10768.t1								C2;PS_Dcarbxylase		2.A.25	The_Alanine_or_Glycine:Cation_Symporter_(AGCS)_Family	_Electrochemical_Potential-driven_Transporters	2.A.25.1.6	phosphatidylserine decarboxylase proenzyme	C:Golgi membrane; F:phosphatidylserine decarboxylase activity; F:calcium ion binding; C:Golgi stack; P:phosphatidylethanolamine biosynthetic process; C:endosome membrane; P:protein autoprocessing
B. dothidea	53_S186_L007_g10769.t1								MIS13						kinetochore protein Mis13	C:MIS12/MIND type complex; P:chromosome segregation; P:cell division
B. dothidea	53_S186_L007_g1077.t1								Sec1		1.F.1	The_Synaptosomal_Vesicle_Fusion_Pore_(SVF-Pore)_Family	_Channels/Pores	1.F.1.1.3	Golgi transport protein Sly1, putative	P:vesicle docking involved in exocytosis
B. dothidea	53_S186_L007_g10771.t1														predicted protein	F:RNA binding; C:nucleus; P:rRNA processing; C:membrane; C:integral component of membrane
B. dothidea	53_S186_L007_g10772.t1								POT1;POT1PC						telomere-binding alpha subunit central domain-containing protein	P:telomere maintenance; C:nuclear chromosome, telomeric region; F:DNA binding; F:single-stranded telomeric DNA binding
B. dothidea	53_S186_L007_g10773.t1								Arm;IBB;Arm_3		1.I.1	The_Eukaryotic_Nuclear_Pore_Complex_(E-NPC)_Family	_Channels/Pores	1.I.1.1.3	ARM repeat-containing protein	C:nucleus; C:cytoplasm; P:protein import into nucleus; F:nuclear import signal receptor activity
B. dothidea	53_S186_L007_g10774.t1								MAP65_ASE1						Microtubule associated protein (Ase1)	P:microtubule cytoskeleton organization; F:microtubule binding
B. dothidea	53_S186_L007_g10775.t1		T1PKS												predicted protein
B. dothidea	53_S186_L007_g10776.t1		T1PKS						PTPLA						PTPLA-domain-containing protein	C:endoplasmic reticulum membrane; P:fatty acid biosynthetic process; C:integral component of membrane; F:very-long-chain 3-hydroxyacyl-CoA dehydratase activity; F:3-hydroxy-arachidoyl-CoA dehydratase activity; F:3-hydroxy-behenoyl-CoA dehydratase activity; F:3-hydroxy-lignoceroyl-CoA dehydratase activity
B. dothidea	53_S186_L007_g10777.t1		T1PKS												RING finger domain-containing protein	P:mRNA splicing, via spliceosome; C:Prp19 complex; F:ubiquitin-protein transferase activity; P:DNA repair; C:membrane; C:integral component of membrane; P:protein ubiquitination; C:SUMO-targeted ubiquitin ligase complex; F:ubiquitin protein ligase activity
[truncated: 236,316+ more rows]

## Sheet: Table 4
Additional file 1 Table 4. Databases and methods used to annotate protein-coding genes in the species
[truncated: 9 more rows]

## Sheet: Table 5
Additional file 1 Table5. Abundance of the different CAZymes types in the species analyzed
[truncated: 8 more rows]

[truncated: 5 more sheets: Table 6, Table 7, Table 8, Table 9, Table 10]
